# Supplementary material
Source: Royal Society of Chemistry journal article supplement (doi:10.1039/d6ob00204h)

# Phosphine-Mediated [2+1] Cyclization of Coumarins for the Efficient Construction of cyclopropa[*c*]coumarin Scaffolds

Min Xiang<sup>a\*</sup>, Xing-Xing Dai<sup>a</sup>, Guang-Wei Wang<sup>a</sup>, Yun-Qing Jia<sup>a\*</sup> and Li-Wen Shen<sup>a\*</sup>

<sup>a</sup>Department of Chemistry and Chemical Engineering, Zunyi Normal University, Zunyi 563002,  
China

E-mail: [xiangm612@163.com](mailto:xiangm612@163.com)

[815266909@qq.com](mailto:815266909@qq.com)

[shenlw1994@163.com](mailto:shenlw1994@163.com)

## Supporting Information

### Table of Contents

|                                                                                                             |    |
|-------------------------------------------------------------------------------------------------------------|----|
| 1. General experimental information .....                                                                   | 1  |
| 2. General experimental procedures for synthesis of compounds <b>3</b> .....                                | 1  |
| 3. Table S1. Optimization of Reaction Condition for <b>1a</b> and <b>4a<sup>a</sup></b> . ....              | 10 |
| 4. General experimental procedures for synthesis of compounds <b>5</b> .....                                | 10 |
| 5. Scale-up experiment .....                                                                                | 14 |
| 6. X-ray crystal data for compound <b>3v</b> .....                                                          | 15 |
| 7. X-ray crystal data for compound <b>5g</b> .....                                                          | 16 |
| 8. The copies of <sup>1</sup> H NMR and <sup>13</sup> C NMR for compounds <b>3a-3x</b> , <b>5a-5h</b> ..... | 17 |

## 1. General experimental information

Reagents were purchased from commercial sources and were used as received unless mentioned otherwise. Reactions were monitored by TLC.  $^1\text{H}$  NMR and  $^{13}\text{C}$  NMR spectra were recorded in  $\text{CDCl}_3$  or  $\text{DMSO-}d_6$ .  $^1\text{H}$  NMR chemical shifts are reported in ppm relative to tetramethylsilane (TMS) with the solvent resonance employed as the internal standard ( $\text{CDCl}_3$  at 7.26 ppm,  $\text{DMSO-}d_6$  at 2.50 ppm). Data are reported as follows: chemical shift, multiplicity (s = singlet, br s = broad singlet, d = doublet, t = triplet, q = quartet, m = multiplet), coupling constants (Hz) and integration.  $^{13}\text{C}$  NMR chemical shifts are reported in ppm from tetramethylsilane (TMS) with the solvent resonance as the internal standard ( $\text{CDCl}_3$  at 77.16 ppm,  $\text{DMSO-}d_6$  at 39.52 ppm). Melting points products were recorded on a Büchi Melting Point B-545. The HRMS were recorded by Thermo Scientific LTQ Orbitrap XL.

## 2. General experimental procedures for synthesis of compounds 3.

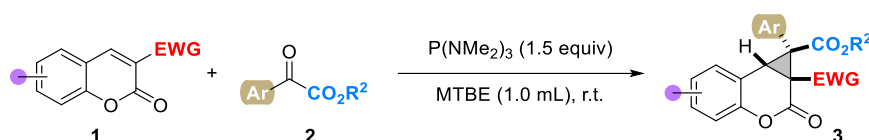

In an ordinary vial charged with a magnetic stirring bar, coumarins **1** (0.1 mmol, 1.0 equiv), benzoylformates **2** (0.15 mmol, 1.5 equiv),  $\text{P}(\text{NMe}_2)_3$  (0.15 mmol, 1.5 equiv) and MTBE (1.0 mL) was added. The reaction was performed without the requirement of anhydrous or inert atmosphere conditions, and then the mixture was stirred at r.t. for 10 h. the products **3** were isolated by flash chromatography on silica gel.

### 1a-ethyl 1-methyl 2-oxo-1-phenyl-1,7b-dihydrocyclopropa[c]chromene-1,1a(2H)-dicarboxylate (3a)

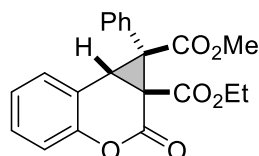

It was purified by flash chromatography (petroleum ether /EtOAc, 10:1) to afford white solid (31.8 mg, 87% yield); m.p. 164.4-166.8 °C.

$^1\text{H}$  NMR (600 MHz,  $\text{CDCl}_3$ )  $\delta$  7.57 – 7.51 (m, 1H), 7.22 – 7.15 (m, 3H), 7.15 – 7.09 (m, 2H), 7.04 – 6.91 (m, 2H), 6.65 – 6.59 (m, 1H), 4.33 (qd,  $J = 7.2, 2.5$  Hz, 2H), 4.05 (s, 1H), 3.70 (s, 3H), 1.35 (t,  $J = 7.1$  Hz, 3H).

$^{13}\text{C}$  NMR (151 MHz,  $\text{CDCl}_3$ )  $\delta$  169.8, 164.9, 160.4, 149.9, 130.6, 129.9, 129.4, 128.8, 128.7, 128.5, 125.1, 116.7, 116.6, 62.9, 53.8, 43.8, 42.5, 35.3, 14.1.

HRMS (ESI) Calcd. for  $\text{C}_{21}\text{H}_{18}\text{O}_6\text{Na}^+$  ( $\text{M}+\text{Na}$ ) $^+$  389.0996, found 389.0992.

### dimethyl 2-oxo-1-phenyl-1,7b-dihydrocyclopropa[c]chromene-1,1a(2H)-dicarboxylate (3b)

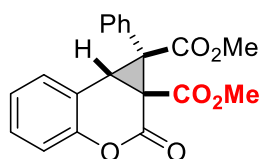

It was purified by flash chromatography (petroleum ether /EtOAc, 5:1) to afford white solid (28.5 mg, 81% yield); m.p. 153.7-155.6 °C.

<sup>1</sup>H NMR (600 MHz, CDCl<sub>3</sub>) δ 7.57 – 7.52 (m, 1H), 7.23 – 7.15 (m, 3H), 7.15 – 7.10 (m, 2H), 6.99 (s, 2H), 6.65 – 6.60 (m, 1H), 4.04 (s, 1H), 3.88 (s, 3H), 3.71 (s, 3H).

<sup>13</sup>C NMR (151 MHz, CDCl<sub>3</sub>) δ 169.8, 165.5, 160.3, 149.8, 130.6, 129.7, 129.5, 128.8, 128.8, 128.5, 125.1, 116.7, 116.5, 53.9, 53.7, 43.6, 42.6, 35.4.

HRMS (ESI) Calcd. for C<sub>20</sub>H<sub>16</sub>O<sub>6</sub>Na<sup>+</sup> (M+Na)<sup>+</sup> 375.0839, found 375.0837.

**1a-(tert-butyl) 1-methyl 2-oxo-1-phenyl-1,7b-dihydrocyclopropa[c]chromene-1,1a(2H)-dicarboxylate (3c)**

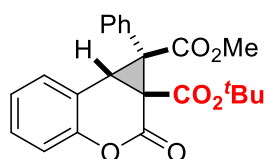

It was purified by flash chromatography (petroleum ether /EtOAc, 15:1) to afford white solid (32.8 mg, 83% yield); m.p. 176.2-178.4 °C.

<sup>1</sup>H NMR (600 MHz, CDCl<sub>3</sub>) δ 7.57 – 7.50 (m, 1H), 7.19 – 7.15 (m, 3H), 7.13 – 7.08 (m, 2H), 7.02 – 6.89 (m, 2H), 6.64 – 6.57 (m, 1H), 4.04 (s, 1H), 3.71 (s, 3H), 1.55 (s, 9H).

<sup>13</sup>C NMR (151 MHz, CDCl<sub>3</sub>) δ 169.9, 163.7, 160.8, 149.9, 130.6, 130.2, 129.2, 128.8, 128.6, 128.4, 124.9, 116.9, 116.6, 83.6, 53.7, 45.0, 42.4, 35.1, 27.9.

HRMS (ESI) Calcd. for C<sub>23</sub>H<sub>22</sub>O<sub>6</sub>Na<sup>+</sup> (M+Na)<sup>+</sup> 417.1309, found 417.1306.

**methyl 1a-benzoyl-2-oxo-1-phenyl-1,1a,2,7b-tetrahydrocyclopropa[c]chromene-1-carboxylate (3d)**

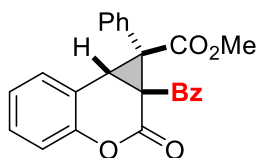

It was purified by flash chromatography (petroleum ether /EtOAc, 13:1) to afford white solid (39.5 mg, 99% yield, 20:1 d.r.); m.p. 173.8-176.6 °C.

<sup>1</sup>H NMR (600 MHz, CDCl<sub>3</sub>) δ 7.99 – 7.91 (m, 2H), 7.63 – 7.54 (m, 2H), 7.48 – 7.42 (m, 2H), 7.27 – 7.21 (m, 3H), 7.21 – 7.19 (m, 1H), 7.19 – 7.06 (m, 3H), 6.74 – 6.68 (m, 1H), 4.19 (s, 1H), 3.61 (s, 3H).

<sup>13</sup>C NMR (151 MHz, CDCl<sub>3</sub>) δ 189.3, 170.0, 161.5, 150.0, 135.0, 134.1, 130.8, 130.3, 129.6, 129.2, 129.1, 128.6, 128.6, 128.5, 125.3, 116.9, 116.4, 53.8, 47.0, 42.2, 36.0.

HRMS (ESI) Calcd. for C<sub>25</sub>H<sub>18</sub>O<sub>5</sub>Na<sup>+</sup> (M+Na)<sup>+</sup> 421.1046, found 421.1043.

**methyl 1a-acetyl-2-oxo-1-phenyl-1,1a,2,7b-tetrahydrocyclopropa[c]chromene-1-carboxylate (3e)**

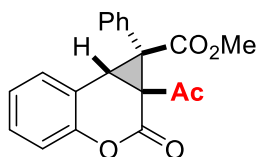

It was purified by flash chromatography (petroleum ether /EtOAc, 10:1) to afford white solid (31.6 mg, 94% yield, 8:1 d.r.); m.p. 162.2-163.8 °C.

**<sup>1</sup>H NMR (600 MHz, CDCl<sub>3</sub>)** δ 7.60 – 7.56 (m, 1H), 7.22 – 7.17 (m, 3H), 7.15 – 7.11 (m, 2H), 7.03 (d, *J* = 7.2 Hz, 2H), 6.67 – 6.61 (m, 1H), 3.99 (s, 1H), 3.69 (s, 3H), 2.67 (s, 3H).

**<sup>13</sup>C NMR (151 MHz, CDCl<sub>3</sub>)** δ 198.7, 169.1, 161.7, 149.7, 130.4, 130.0, 129.4, 129.0, 128.8, 128.6, 125.1, 116.9, 116.6, 53.7, 47.4, 45.8, 35.4, 30.5.

**HRMS (ESI)** Calcd. for C<sub>20</sub>H<sub>16</sub>O<sub>5</sub>Na<sup>+</sup> (M+Na)<sup>+</sup> 359.0890, found 359.0890.

**1a-ethyl 1-methyl 4-methyl-2-oxo-1-phenyl-1,7b-dihydrocyclopropa[c]chromene-1,1a(2H)-dicarboxylate (3f)**

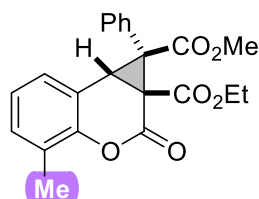

It was purified by flash chromatography (petroleum ether /EtOAc, 12:1) to afford white solid (29.6 mg, 78% yield); m.p. 152.1-154.3 °C.

**<sup>1</sup>H NMR (600 MHz, CDCl<sub>3</sub>)** δ 7.36 (dd, *J* = 7.5, 1.7 Hz, 1H), 7.20 – 7.15 (m, 1H), 7.12 – 7.08 (m, 2H), 7.08 – 7.05 (m, 1H), 7.03 – 7.00 (m, 1H), 7.00 – 6.93 (m, 2H), 4.33 (tq, *J* = 7.2, 3.5 Hz, 2H), 4.03 (s, 1H), 3.70 (s, 3H), 1.90 (s, 3H), 1.35 (t, *J* = 7.2 Hz, 3H).

**<sup>13</sup>C NMR (151 MHz, CDCl<sub>3</sub>)** δ 169.9, 165.0, 160.6, 148.2, 130.8, 130.6, 130.0, 128.6, 128.3, 126.3, 126.1, 124.4, 116.2, 62.8, 53.8, 44.1, 42.3, 35.6, 15.4, 14.1.

**HRMS (ESI)** Calcd. for C<sub>22</sub>H<sub>20</sub>O<sub>6</sub>Na<sup>+</sup> (M+Na)<sup>+</sup> 403.1152, found 403.1153.

**1a-ethyl 1-methyl 5-methyl-2-oxo-1-phenyl-1,7b-dihydrocyclopropa[c]chromene-1,1a(2H)-dicarboxylate (3g)**

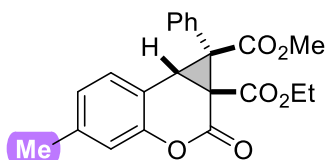

It was purified by flash chromatography (petroleum ether /EtOAc, 12:1) to afford white solid (29.5 mg, 78% yield); m.p. 143.2-144.8 °C.

**<sup>1</sup>H NMR (600 MHz, CDCl<sub>3</sub>)** δ 7.41 (d, *J* = 7.7 Hz, 1H), 7.22 – 7.17 (m, 1H), 7.15 – 7.10 (m, 2H), 7.05 – 6.96 (m, 3H), 6.46 – 6.41 (m, 1H), 4.32 (qd, *J* = 7.1, 2.2 Hz, 2H), 4.00 (s, 1H), 3.69 (s, 3H), 2.25 (s, 3H), 1.35 (t, *J* = 7.1 Hz, 3H).

**<sup>13</sup>C NMR (101 MHz, CDCl<sub>3</sub>)** δ 169.9, 165.0, 160.7, 149.7, 139.9, 130.7, 130.0, 128.6, 128.4, 125.9, 117.0, 113.4, 62.8, 53.7, 43.7, 42.5, 35.2, 21.3, 14.1.

**HRMS (ESI)** Calcd. for C<sub>22</sub>H<sub>20</sub>O<sub>6</sub>Na<sup>+</sup> (M+Na)<sup>+</sup> 403.1152, found 403.1150.

**1a-ethyl 1-methyl 5-bromo-2-oxo-1-phenyl-1,7b-dihydrocyclopropa[c]chromene-1,1a(2H)-dicarboxylate (3h)**

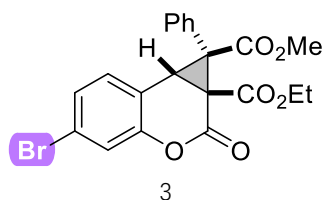

It was purified by flash chromatography (petroleum ether /EtOAc, 12:1) to afford white solid (32.3 mg, 73% yield); m.p. 173.7-175.3 °C.

<sup>1</sup>H NMR (600 MHz, CDCl<sub>3</sub>) δ 7.42 (d, *J* = 8.2 Hz, 1H), 7.33 (dd, *J* = 8.2, 1.9 Hz, 1H), 7.25 – 7.21 (m, 1H), 7.18 – 7.14 (m, 2H), 7.03 – 6.95 (m, 2H), 6.80 (d, *J* = 1.9 Hz, 1H), 4.33 (qd, *J* = 7.1, 2.0 Hz, 2H), 4.00 (s, 1H), 3.70 (s, 3H), 1.35 (t, *J* = 7.1 Hz, 3H).

<sup>13</sup>C NMR (151 MHz, CDCl<sub>3</sub>) δ 169.5, 164.6, 159.8, 150.2, 130.5, 129.9, 129.6, 129.0, 128.7, 128.2, 122.3, 119.9, 115.8, 63.0, 53.9, 43.4, 42.6, 34.9, 14.1.

HRMS (ESI) Calcd. for C<sub>21</sub>H<sub>17</sub>BrO<sub>6</sub>Na<sup>+</sup> (M+Na)<sup>+</sup> 467.0101, 469.0080, found 467.0101, 469.0081.

### 1a-ethyl 1-methyl 6-methyl-2-oxo-1-phenyl-1,7b-dihydrocyclopropa[c]chromene-1,1a(2H)-dicarboxylate (3i)

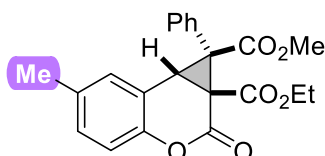

It was purified by flash chromatography (petroleum ether /EtOAc, 12:1) to afford White solid (28.2 mg, 74% yield); m.p. 152.4-154.3 °C.

<sup>1</sup>H NMR (600 MHz, CDCl<sub>3</sub>) δ 7.37 – 7.33 (m, 1H), 7.23 – 7.17 (m, 1H), 7.16 – 7.10 (m, 2H), 7.00 (d, *J* = 7.6 Hz, 2H), 6.98 – 6.94 (m, 1H), 6.51 (d, *J* = 8.3 Hz, 1H), 4.32 (qd, *J* = 7.2, 2.3 Hz, 2H), 3.99 (s, 1H), 3.70 (s, 3H), 2.37 (s, 3H), 1.35 (t, *J* = 7.1 Hz, 3H).

<sup>13</sup>C NMR (101 MHz, CDCl<sub>3</sub>) δ 169.9, 165.0, 160.6, 147.9, 134.8, 130.6, 130.0, 129.0, 128.7, 128.5, 116.4, 116.2, 62.8, 53.8, 43.8, 42.5, 35.4, 20.9, 14.1.

HRMS (ESI) Calcd. for C<sub>22</sub>H<sub>20</sub>O<sub>6</sub>Na<sup>+</sup> (M+Na)<sup>+</sup> 403.1152, found 403.1152.

### 1a-ethyl 1-methyl 6-bromo-2-oxo-1-phenyl-1,7b-dihydrocyclopropa[c]chromene-1,1a(2H)-dicarboxylate (3j)

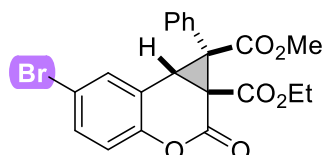

It was purified by flash chromatography (petroleum ether /EtOAc, 15:1) to afford White solid (36.7 mg, 83% yield); m.p. 162.7-165.2 °C.

<sup>1</sup>H NMR (600 MHz, CDCl<sub>3</sub>) δ 7.71 (d, *J* = 2.4 Hz, 1H), 7.29 (dd, *J* = 8.7, 2.4 Hz, 1H), 7.25 – 7.20 (m, 1H), 7.19 – 7.13 (m, 2H), 7.08 – 6.94 (m, 2H), 6.51 (d, *J* = 8.7 Hz, 1H), 4.33 (qd, *J* = 7.1, 1.4 Hz, 2H), 4.00 (s, 1H), 3.70 (s, 3H), 1.35 (t, *J* = 7.2 Hz, 3H).

<sup>13</sup>C NMR (151 MHz, CDCl<sub>3</sub>) δ 169.5, 164.6, 159.9, 148.9, 132.4, 131.4, 130.5, 129.5, 129.0, 128.7, 118.8, 118.4, 117.5, 63.0, 53.9, 43.4, 42.7, 34.8, 14.1.

HRMS (ESI) Calcd. for C<sub>21</sub>H<sub>17</sub>BrO<sub>6</sub>Na<sup>+</sup> (M+Na)<sup>+</sup> 467.0101, 469.0080, found 467.0104, 469.0083.

### 1a-ethyl 1-methyl 6-chloro-2-oxo-1-phenyl-1,7b-dihydrocyclopropa[c]chromene-1,1a(2H)-dicarboxylate (3k)

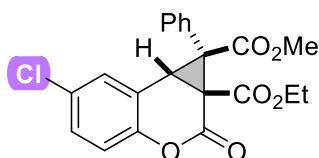

It was purified by flash chromatography (petroleum ether /EtOAc, 15:1) to afford White solid (33.7 mg, 74% yield); m.p. 160.5-162.3 °C.

**<sup>1</sup>H NMR (600 MHz, CDCl<sub>3</sub>)** δ 7.56 (d, *J* = 2.5 Hz, 1H), 7.25 – 7.20 (m, 1H), 7.19 – 7.12 (m, 3H), 7.05 – 6.96 (m, 2H), 6.57 (d, *J* = 8.7 Hz, 1H), 4.33 (qd, *J* = 7.2, 1.5 Hz, 2H), 4.00 (s, 1H), 3.70 (s, 3H), 1.35 (t, *J* = 7.1 Hz, 3H).

**<sup>13</sup>C NMR (151 MHz, CDCl<sub>3</sub>)** δ 169.5, 164.6, 159.9, 148.4, 130.5, 130.2, 129.6, 129.5, 128.9, 128.7, 128.5, 118.3, 118.1, 63.0, 53.9, 43.4, 42.7, 34.8, 14.1.

**HRMS (ESI)** Calcd. for C<sub>21</sub>H<sub>17</sub>ClO<sub>6</sub>Na<sup>+</sup> (M+Na)<sup>+</sup> 423.0606, 425.0576, found 423.0607, 425.0573.

**1a-ethyl 1-methyl 7-methyl-2-oxo-1-phenyl-1,7b-dihydrocyclopropa[c]chromene-1,1a(2H)-dicarboxylate (3l)**

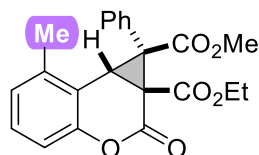

It was purified by flash chromatography (petroleum ether /EtOAc, 12:1) to afford White solid (29.4 mg, 77% yield); m.p. 162.1-164.5 °C.

**<sup>1</sup>H NMR (600 MHz, CDCl<sub>3</sub>)** δ 7.41 (d, *J* = 7.7 Hz, 1H), 7.23 – 7.17 (m, 1H), 7.15 – 7.09 (m, 2H), 7.04 – 6.94 (m, 3H), 6.48 – 6.40 (m, 1H), 4.32 (qd, *J* = 7.1, 2.2 Hz, 2H), 4.00 (s, 1H), 3.69 (s, 3H), 2.25 (s, 3H), 1.35 (t, *J* = 7.1 Hz, 3H).

**<sup>13</sup>C NMR (101 MHz, CDCl<sub>3</sub>)** δ 169.9, 165.1, 160.7, 149.8, 139.9, 130.7, 130.0, 128.7, 128.5, 125.9, 117.0, 113.5, 62.8, 53.8, 43.7, 42.5, 35.2, 21.3, 14.1.

**HRMS (ESI)** Calcd. for C<sub>22</sub>H<sub>20</sub>O<sub>6</sub>Na<sup>+</sup> (M+Na)<sup>+</sup> 403.1152, found 403.1152.

**1a-ethyl 1-methyl 2-oxo-1-phenyl-1,9c-dihydrobenzo[f]cyclopropa[c]chromene-1,1a(2H)-dicarboxylate (3m)**

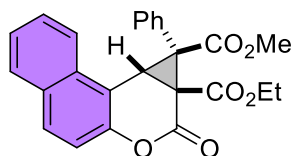

It was purified by flash chromatography (petroleum ether /EtOAc, 20:1) to afford White solid (32.5 mg, 78% yield); m.p. 167.3-169.4 °C.

**<sup>1</sup>H NMR (600 MHz, CDCl<sub>3</sub>)** δ 8.32 – 8.24 (m, 1H), 7.89 – 7.82 (m, 1H), 7.78 – 7.71 (m, 1H), 7.68 (d, *J* = 8.9 Hz, 1H), 7.60 – 7.54 (m, 1H), 7.16 – 7.10 (m, 1H), 7.05 – 6.97 (m, 2H), 6.93 – 6.83 (m, 2H), 6.81 (d, *J* = 8.9 Hz, 1H), 4.52 (s, 1H), 4.36 (qd, *J* = 7.1, 5.3 Hz, 2H), 3.76 (s, 3H), 1.37 (t, *J* = 7.1 Hz, 3H).

**<sup>13</sup>C NMR (151 MHz, CDCl<sub>3</sub>)** δ 169.9, 165.2, 160.4, 147.8, 131.5, 130.8, 130.4, 130.1, 129.9, 129.0, 128.8, 128.5, 128.3, 125.9, 122.9, 116.7, 110.0, 63.0, 53.9, 43.0, 42.7, 32.2, 14.2.

**HRMS (ESI)** Calcd. for C<sub>25</sub>H<sub>20</sub>O<sub>6</sub>Na<sup>+</sup> (M+Na)<sup>+</sup> 439.1152, found 439.1151.

**diethyl 2-oxo-1-phenyl-1,7b-dihydrocyclopropa[c]chromene-1,1a(2H)-dicarboxylate (3n)**

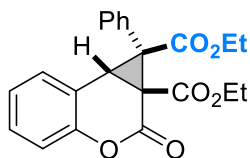

It was purified by flash chromatography (petroleum ether /EtOAc, 8:1) to afford White solid (29.9 mg, 79% yield); m.p. 158.7-160.1 °C.

**<sup>1</sup>H NMR (600 MHz, CDCl<sub>3</sub>)** δ 7.55 (dd, *J* = 6.8, 2.5 Hz, 1H), 7.22 – 7.14 (m, 3H), 7.14 – 7.06 (m, 2H), 6.98 (d, *J* = 7.5 Hz, 2H), 6.66 – 6.58 (m, 1H), 4.37 – 4.28 (m, 2H), 4.25 – 4.17 (m, 1H), 4.13 – 4.06 (m, 1H), 4.04 (s, 1H), 1.36 (td, *J* = 7.1, 1.2 Hz, 3H), 1.17 (td, *J* = 7.1, 1.4 Hz, 3H).

**<sup>13</sup>C NMR (151 MHz, CDCl<sub>3</sub>)** δ 169.2, 164.9, 160.5, 149.9, 130.6, 130.0, 129.3, 128.8, 128.6, 128.4, 125.0, 116.8, 116.7, 62.9, 62.8, 43.7, 42.7, 35.1, 14.1, 14.0.

**HRMS (ESI)** Calcd. for C<sub>22</sub>H<sub>20</sub>O<sub>6</sub>Na<sup>+</sup> (M+Na)<sup>+</sup> 403.1152, found 403.1151.

**diethyl 2-oxo-1-(p-tolyl)-1,7b-dihydrocyclopropa[c]chromene-1,1a(2H)-dicarboxylate (3o)**

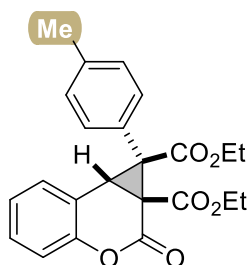

It was purified by flash chromatography (petroleum ether /EtOAc, 10:1) to afford White solid (34.1 mg, 87% yield); m.p. 155.2-158.3 °C.

**<sup>1</sup>H NMR (600 MHz, CDCl<sub>3</sub>)** δ 7.55 (dd, *J* = 5.8, 3.4 Hz, 1H), 7.18 (dd, *J* = 5.9, 3.4 Hz, 2H), 6.91 (d, *J* = 7.8 Hz, 2H), 6.86 (d, *J* = 8.1 Hz, 2H), 6.65 (dd, *J* = 5.8, 3.6 Hz, 1H), 4.32 (qd, *J* = 7.2, 1.7 Hz, 2H), 4.21 (dq, *J* = 10.7, 7.1 Hz, 1H), 4.09 (dq, *J* = 10.8, 7.1 Hz, 1H), 4.01 (s, 1H), 2.22 (s, 3H), 1.35 (t, *J* = 7.1 Hz, 3H), 1.18 (t, *J* = 7.1 Hz, 3H).

**<sup>13</sup>C NMR (151 MHz, CDCl<sub>3</sub>)** δ 169.3, 165.1, 160.5, 149.9, 138.5, 130.4, 129.3, 129.1, 128.8, 126.9, 124.9, 116.9, 116.7, 62.8, 62.7, 43.5, 42.5, 35.1, 21.3, 14.1, 14.0.

**HRMS (ESI)** Calcd. for C<sub>23</sub>H<sub>22</sub>O<sub>6</sub>Na<sup>+</sup> (M+Na)<sup>+</sup> 417.1309, found 417.1303.

**diethyl 1-(4-(tert-butyl)phenyl)-2-oxo-1,7b-dihydrocyclopropa[c]chromene-1,1a(2H)-dicarboxylate (3p)**

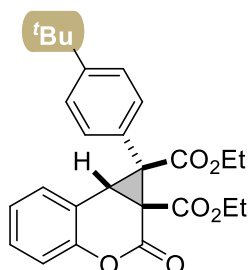

It was purified by flash chromatography (petroleum ether /EtOAc, 10:1) to afford White solid (36.0 mg, 83% yield); m.p. 146.7-148.1 °C.

**<sup>1</sup>H NMR (600 MHz, CDCl<sub>3</sub>)** δ 7.54 (dd, *J* = 7.6, 1.6 Hz, 1H), 7.44 – 7.40 (m, 2H), 7.39 – 7.35 (m, 2H), 7.33 – 7.28 (m, 1H), 7.22 – 7.15 (m, 1H), 7.05 (dd, *J* = 8.2, 1.2 Hz, 1H), 3.98 – 3.92 (m, 2H), 3.90 (q, *J* = 7.1 Hz, 2H), 3.80 (dq, *J* = 10.7, 7.1 Hz, 1H), 1.30 (s, 9H), 0.83 (dt, *J* = 14.5, 7.1 Hz, 6H).

**<sup>13</sup>C NMR (151 MHz, CDCl<sub>3</sub>)** δ 166.4, 163.8, 159.8, 152.3, 150.4, 129.4, 129.3, 129.2, 125.7, 124.8, 116.9, 115.9, 62.6, 62.5, 47.5, 39.9, 34.8, 32.0, 31.3, 13.6, 13.5.

**HRMS (ESI)** Calcd. for C<sub>26</sub>H<sub>28</sub>O<sub>6</sub>Na<sup>+</sup> (M+Na)<sup>+</sup> 459.1778, found 459.1776.

**diethyl 1-(4-methoxyphenyl)-2-oxo-1,7b-dihydrocyclopropa[*c*]chromene-1,1a(2*H*)-dicarboxylate (3q)**

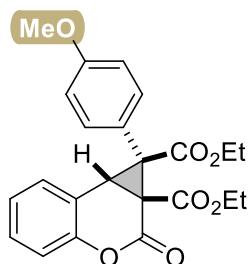

It was purified by flash chromatography (petroleum ether /EtOAc, 6:1) to afford White solid (33.6 mg, 82% yield); m.p. 166.7-168.9 °C.

**<sup>1</sup>H NMR (400 MHz, CDCl<sub>3</sub>)** δ 7.54 (dd, *J* = 5.7, 3.5 Hz, 1H), 7.18 (dd, *J* = 5.9, 3.4 Hz, 2H), 6.90 (d, *J* = 7.9 Hz, 2H), 6.69 – 6.58 (m, 3H), 4.32 (qd, *J* = 7.1, 0.9 Hz, 2H), 4.21 (dq, *J* = 10.8, 7.1 Hz, 1H), 4.09 (dq, *J* = 10.8, 7.1 Hz, 1H), 4.01 (s, 1H), 3.70 (s, 3H), 1.35 (t, *J* = 7.1 Hz, 3H), 1.19 (t, *J* = 7.1 Hz, 3H).

**<sup>13</sup>C NMR (151 MHz, CDCl<sub>3</sub>)** δ 169.4, 165.0, 160.5, 159.6, 149.9, 131.8, 129.3, 128.7, 125.0, 121.8, 116.8, 116.7, 113.8, 62.8, 62.7, 55.2, 43.6, 42.2, 35.1, 14.1, 14.0.

**HRMS (ESI)** Calcd. for C<sub>23</sub>H<sub>22</sub>O<sub>7</sub>Na<sup>+</sup> (M+Na)<sup>+</sup> 433.12577, found 433.12549.

**diethyl 1-(4-chlorophenyl)-2-oxo-1,7b-dihydrocyclopropa[*c*]chromene-1,1a(2*H*)-dicarboxylate (3r)**

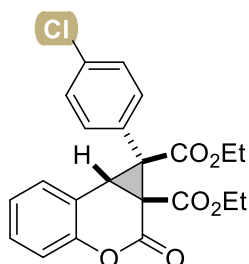

It was purified by flash chromatography (petroleum ether /EtOAc, 10:1) to afford White solid (37.3 mg, 90% yield); m.p. 158.7-161.2 °C.

**<sup>1</sup>H NMR (400 MHz, CDCl<sub>3</sub>)** δ 7.58 – 7.50 (m, 1H), 7.25 – 7.17 (m, 2H), 7.12 – 7.05 (m, 2H), 6.97 – 6.83 (m, 2H), 6.71 – 6.63 (m, 1H), 4.32 (qd, *J* = 7.2, 1.0 Hz, 2H), 4.21 (dq, *J* = 10.8, 7.1 Hz, 1H), 4.10 (dq, *J* = 10.7, 7.1 Hz, 1H), 4.04 (s, 1H), 1.35 (t, *J* = 7.1 Hz, 3H), 1.18 (t, *J* = 7.1 Hz, 3H).

**<sup>13</sup>C NMR (151 MHz, CDCl<sub>3</sub>)** δ 168.8, 164.6, 160.2, 149.8, 134.8, 131.9, 129.6, 128.8, 128.7, 128.6, 125.2, 116.9, 116.4, 63.1, 62.9, 43.8, 41.9, 35.1, 14.1, 14.0.

**HRMS (ESI)** Calcd. for C<sub>22</sub>H<sub>19</sub>ClO<sub>6</sub>Na<sup>+</sup> (M+Na)<sup>+</sup> 437.0762, 439.0733, found 437.0761, 439.0726.

**diethyl 1-(4-bromophenyl)-2-oxo-1,7b-dihydrocyclopropa[*c*]chromene-1,1a(2*H*)-**

### dicarboxylate (3s)

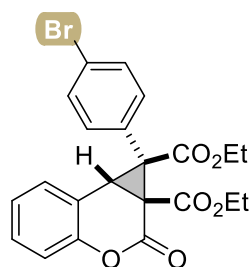

It was purified by flash chromatography (petroleum ether /EtOAc, 8:1) to afford White solid (36.9 mg, 81% yield); m.p. 180.2-182.5 °C.

**<sup>1</sup>H NMR (600 MHz, CDCl<sub>3</sub>)** δ 7.57 – 7.51 (m, 1H), 7.26 – 7.23 (m, 2H), 7.23 – 7.17 (m, 2H), 6.85 (s, 2H), 6.72 – 6.65 (m, 1H), 4.32 (qd, *J* = 7.2, 1.9 Hz, 2H), 4.21 (dq, *J* = 10.8, 7.1 Hz, 1H), 4.10 (dq, *J* = 10.7, 7.1 Hz, 1H), 4.03 (s, 1H), 1.35 (t, *J* = 7.2 Hz, 3H), 1.18 (t, *J* = 7.1 Hz, 3H).

**<sup>13</sup>C NMR (151 MHz, CDCl<sub>3</sub>)** δ 168.7, 164.6, 160.2, 149.8, 132.2, 131.7, 129.6, 129.2, 128.8, 125.2, 123.2, 116.9, 116.4, 63.1, 62.9, 43.7, 41.9, 35.1, 14.1, 14.0.

**HRMS (ESI)** Calcd. for C<sub>22</sub>H<sub>19</sub>BrO<sub>6</sub>Na<sup>+</sup> (M+Na)<sup>+</sup> 481.0257, 483.0237, found 481.0258, 483.0237.

### diethyl 1-(3,4-dichlorophenyl)-2-oxo-1,7b-dihydrocyclopropa[*c*]chromene-1,1a(2*H*)-dicarboxylate (3t)

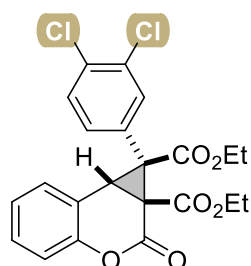

It was purified by flash chromatography (petroleum ether /EtOAc, 20:1) to afford white solid (39.5 mg, 88% yield); m.p. 175.2-177.1 °C.

**<sup>1</sup>H NMR (600 MHz, CDCl<sub>3</sub>)** δ 7.56 (dd, *J* = 7.1, 2.2 Hz, 1H), 7.26 – 7.20 (m, 3H), 6.93 (d, *J* = 59.6 Hz, 2H), 6.72 (dd, *J* = 7.7, 1.7 Hz, 1H), 4.33 (qd, *J* = 7.1, 1.4 Hz, 2H), 4.26 – 4.20 (m, 1H), 4.15 – 4.07 (m, 1H), 4.04 (s, 1H), 1.35 (t, *J* = 7.1 Hz, 3H), 1.20 (t, *J* = 7.1 Hz, 3H).

**<sup>13</sup>C NMR (151 MHz, CDCl<sub>3</sub>)** δ 168.4, 164.4, 159.9, 149.7, 133.3, 132.5, 132.4, 130.6, 130.3, 130.1, 129.9, 128.8, 125.4, 117.0, 116.0, 63.3, 63.0, 43.9, 41.2, 35.1, 14.1, 14.0.

**HRMS (ESI)** Calcd. for C<sub>22</sub>H<sub>18</sub>Cl<sub>2</sub>O<sub>6</sub>Na<sup>+</sup> (M+Na)<sup>+</sup> 471.0373, 473.0343, 475.0314, found 471.0377, 473.0346, 475.0304.

### triethyl 2-oxocyclopropa[*c*]chromene-1,1,1a(2*H*,7*bH*)-tricarboxylate (3u)

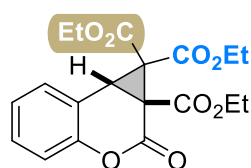

It was purified by flash chromatography (petroleum ether /EtOAc, 8:1) to afford white solid (28.7 mg, 76% yield); m.p. 147.4-149.8 °C.

**<sup>1</sup>H NMR (600 MHz, CDCl<sub>3</sub>)** δ 7.46 (dd, *J* = 7.6, 1.6 Hz, 1H), 7.34 – 7.29 (m, 1H), 7.20 – 7.15 (m, 1H), 7.03 (dd, *J* = 8.3, 1.2 Hz, 1H), 4.34 – 4.24 (m, 4H), 3.97 (q, *J* = 7.1 Hz, 2H), 3.81 (s, 1H), 1.31 (dt, *J* = 13.2, 7.1 Hz, 6H), 0.93 (t, *J* = 7.1 Hz, 3H).

**<sup>13</sup>C NMR (151 MHz, CDCl<sub>3</sub>)** δ 165.5, 163.8, 163.1, 159.3, 150.2, 130.0, 129.5, 125.1, 117.1, 114.1, 63.4, 63.1, 62.8, 43.9, 40.8, 33.6, 14.1, 14.0, 13.5.

**HRMS (ESI)** Calcd. for C<sub>19</sub>H<sub>20</sub>O<sub>8</sub>Na<sup>+</sup> (M+Na)<sup>+</sup> 399.1050, found 399.1050.

**1-(cyclopropylmethyl) 1a-ethyl 2-oxo-1-phenyl-1,7b-dihydrocyclopropa[*c*]chromene-1,1a(2*H*)-dicarboxylate (3v)**

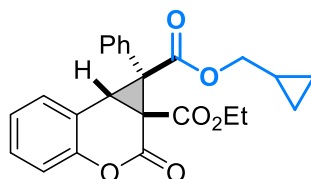

It was purified by flash chromatography (petroleum ether /EtOAc, 15:1) to afford white solid (32.7 mg, 81% yield); m.p. 143.5-147.0 °C.

**<sup>1</sup>H NMR (600 MHz, CDCl<sub>3</sub>)** δ 7.59 – 7.53 (m, 1H), 7.22 – 7.15 (m, 3H), 7.15 – 7.07 (m, 2H), 7.00 (d, *J* = 7.4 Hz, 2H), 6.67 – 6.58 (m, 1H), 4.38 – 4.28 (m, 2H), 4.04 (s, 1H), 3.99 (ddd, *J* = 11.3, 6.9, 1.2 Hz, 1H), 3.90 (ddd, *J* = 11.3, 7.0, 1.3 Hz, 1H), 1.35 (td, *J* = 7.1, 1.6 Hz, 3H), 1.06 – 0.97 (m, 1H), 0.51 – 0.42 (m, 2H), 0.20 – 0.11 (m, 2H).

**<sup>13</sup>C NMR (151 MHz, CDCl<sub>3</sub>)** δ 169.3, 164.9, 160.5, 149.9, 130.6, 130.1, 129.3, 128.8, 128.6, 128.4, 125.0, 116.8, 116.7, 71.1, 62.8, 43.6, 42.8, 35.2, 14.1, 9.5, 3.2, 3.1.

**HRMS (ESI)** Calcd. for C<sub>24</sub>H<sub>22</sub>O<sub>6</sub>Na<sup>+</sup> (M+Na)<sup>+</sup> 429.1309, found 429.1309.

**1a-ethyl 1-(naphthalen-2-ylmethyl) 2-oxo-1-phenyl-1,7b-dihydrocyclopropa[*c*]chromene-1,1a(2*H*)-dicarboxylate (3w)**

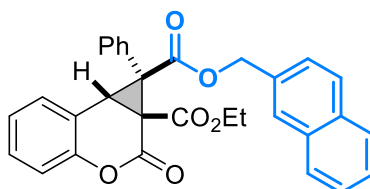

It was purified by flash chromatography (petroleum ether /EtOAc, 10:1) to afford white solid (38.4 mg, 87% yield); m.p. 160.2-161.9 °C.

**<sup>1</sup>H NMR (600 MHz, CDCl<sub>3</sub>)** δ 7.80 (dd, *J* = 6.1, 3.4 Hz, 1H), 7.76 (d, *J* = 8.5 Hz, 1H), 7.72 (dd, *J* = 6.2, 3.3 Hz, 1H), 7.57 – 7.53 (m, 1H), 7.52 (s, 1H), 7.49 – 7.44 (m, 2H), 7.25 – 7.20 (m, 2H), 7.20 – 7.17 (m, 2H), 7.17 – 7.13 (m, 2H), 7.04 (s, 2H), 6.67 – 6.61 (m, 1H), 5.35 – 5.24 (m, 2H), 4.30 – 4.14 (m, 2H), 4.09 – 4.04 (m, 1H), 1.23 (td, *J* = 7.1, 1.7 Hz, 3H).

**<sup>13</sup>C NMR (101 MHz, CDCl<sub>3</sub>)** δ 169.2, 164.9, 160.4, 149.9, 133.2, 133.1, 132.7, 130.7, 130.0, 129.4, 128.8, 128.7, 128.5, 128.4, 128.1, 127.8, 126.5, 126.4, 126.3, 125.1, 116.7, 116.6, 68.2, 62.9, 43.9, 42.7, 35.3, 14.0.

**HRMS (ESI)** Calcd. for C<sub>31</sub>H<sub>24</sub>O<sub>6</sub>Na<sup>+</sup> (M+Na)<sup>+</sup> 515.1465, found 515.1468.

**ethyl 1-acetyl-1-methyl-2-oxo-1,7b-dihydrocyclopropa[*c*]chromene-1a(2*H*)-carboxylate (3x)**

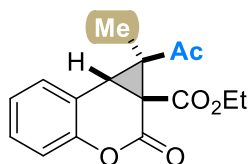

It was purified by flash chromatography (petroleum ether /EtOAc, 10:1) to afford white solid (24.0 mg, 83% yield); m.p. 162.8-164.3 °C.

<sup>1</sup>H NMR (600 MHz, CDCl<sub>3</sub>) δ 7.39 (dd, *J* = 7.6, 1.6 Hz, 1H), 7.36 – 7.32 (m, 1H), 7.23 – 7.17 (m, 1H), 7.08 (dd, *J* = 8.2, 1.2 Hz, 1H), 4.25 – 4.16 (m, 2H), 3.74 (s, 1H), 2.45 (s, 3H), 1.30 – 1.26 (m, 6H).

<sup>13</sup>C NMR (151 MHz, CDCl<sub>3</sub>) δ 203.6, 165.0, 160.6, 150.4, 129.4, 129.4, 125.4, 117.0, 116.4, 62.7, 42.9, 38.4, 33.7, 29.0, 13.9, 11.5.

HRMS (ESI) Calcd. for C<sub>16</sub>H<sub>16</sub>O<sub>5</sub>Na<sup>+</sup> (M+Na)<sup>+</sup> 311.0890, found 311.0890.

### 3. Table S1. Optimization of Reaction Condition for **1a** and **4a**<sup>a</sup>.

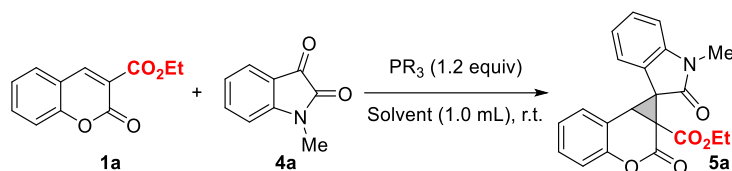

| Entry           | PR <sub>3</sub>                   | Solvent           | Yield <sup>b</sup> (%) |
|-----------------|-----------------------------------|-------------------|------------------------|
| 1               | P(NMe <sub>2</sub> ) <sub>3</sub> | DCM               | 74                     |
| 2               | P(NMe <sub>2</sub> ) <sub>3</sub> | MeCN              | 64                     |
| 3               | P(NMe <sub>2</sub> ) <sub>3</sub> | THF               | 50                     |
| 4               | P(NMe <sub>2</sub> ) <sub>3</sub> | Toluene           | N.R.                   |
| 5               | P(NMe <sub>2</sub> ) <sub>3</sub> | Et <sub>2</sub> O | 28                     |
| 6               | P(NMe <sub>2</sub> ) <sub>3</sub> | Acetone           | 66                     |
| 7               | P(NMe <sub>2</sub> ) <sub>3</sub> | MTBE              | 95                     |
| 8               | P(NMe <sub>2</sub> ) <sub>3</sub> | EA                | 61                     |
| 9               | P(OMe) <sub>3</sub>               | MTBE              | N.R.                   |
| 10              | PPh <sub>3</sub>                  | MTBE              | N.R.                   |
| 11 <sup>c</sup> | P(NMe <sub>2</sub> ) <sub>3</sub> | MTBE              | 80                     |
| 12 <sup>d</sup> | P(NMe <sub>2</sub> ) <sub>3</sub> | MTBE              | 59                     |
| 13 <sup>e</sup> | P(NMe <sub>2</sub> ) <sub>3</sub> | MTBE              | Messy                  |

<sup>a</sup>Unless specified, the reactions were carried out with **1a** (0.1 mmol), **4a** (0.12 mmol) and PR<sub>3</sub> (0.12 mmol, 1.2 equiv) in 1.0 mL of solvent at r.t. for 18 h. <sup>b</sup>isolated yield. <sup>c</sup>**4a** (1.5 equiv) and P(NMe<sub>2</sub>)<sub>3</sub> (1.5 equiv) were used. <sup>d</sup> 0 °C. <sup>e</sup> 50 °C.

### 4. General experimental procedures for synthesis of compounds **5**.

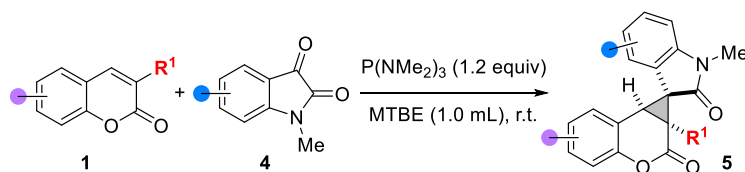

In an ordinary vial charged with a magnetic stirring bar, coumarins **1** (0.1 mmol, 1.0 equiv), isatins **4** (0.12 mmol, 1.2 equiv), P(NMe<sub>2</sub>)<sub>3</sub> (0.12 mmol, 1.2 equiv) and MTBE (1.0 mL) was added. The reaction was performed without the requirement of anhydrous or inert atmosphere conditions, and then the mixture was stirred at r.t. for 18 h. the products **5** were isolated by flash chromatography on silica gel.

**ethyl 1'-methyl-2,2'-dioxo-2H-spiro[cyclopropa[c]chromene-1,3'-indoline]-1a(7bH)-carboxylate (5a)**

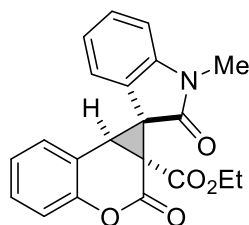

It was purified by flash chromatography (petroleum ether /EtOAc, 5:1) to afford white solid (34.6 mg, 95% yield); m.p. 185.7-188.2 °C.

**<sup>1</sup>H NMR (600 MHz, CDCl<sub>3</sub>)** δ 7.39 – 7.32 (m, 2H), 7.30 (dd, *J* = 7.6, 1.6 Hz, 1H), 7.16 (dd, *J* = 8.4, 1.2 Hz, 1H), 7.15 – 7.11 (m, 1H), 7.11 – 7.06 (m, 1H), 7.03 (dd, *J* = 7.5, 1.3 Hz, 1H), 6.91 (d, *J* = 7.8 Hz, 1H), 4.27 (qd, *J* = 7.1, 1.9 Hz, 2H), 3.87 (s, 1H), 3.16 (s, 3H), 1.21 (t, *J* = 7.1 Hz, 3H).

**<sup>13</sup>C NMR (151 MHz, CDCl<sub>3</sub>)** δ 168.5, 163.8, 159.0, 152.0, 144.1, 130.0, 129.1, 124.7, 124.0, 122.6, 120.9, 116.5, 112.8, 108.9, 63.4, 43.0, 38.2, 36.3, 26.8, 14.2.

**HRMS (ESI)** Calcd. for C<sub>21</sub>H<sub>17</sub>NO<sub>5</sub>Na<sup>+</sup> (M+Na)<sup>+</sup> 386.0999, found 386.0994.

**ethyl 1',4-dimethyl-2,2'-dioxo-2H-spiro[cyclopropa[c]chromene-1,3'-indoline]-1a(7bH)-carboxylate (5b)**

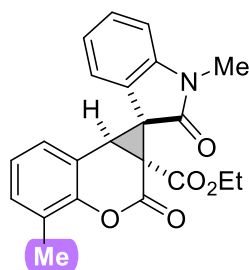

It was purified by flash chromatography (petroleum ether /EtOAc, 5:1) to afford white solid (33.3 mg, 88% yield); m.p. 178.4-179.9 °C.

**<sup>1</sup>H NMR (400 MHz, CDCl<sub>3</sub>)** δ 7.40 – 7.32 (m, 1H), 7.21 – 7.16 (m, 1H), 7.12 (dd, *J* = 7.6, 1.7 Hz, 1H), 7.10 – 7.05 (m, 1H), 7.05 – 7.03 (m, 1H), 7.03 – 6.99 (m, 1H), 6.90 (dd, *J* = 7.9, 0.8 Hz, 1H), 4.27 (qd, *J* = 7.1, 1.6 Hz, 2H), 3.86 (s, 1H), 3.15 (s, 3H), 2.41 (s, 3H), 1.21 (t, *J* = 7.2 Hz, 3H).

**<sup>13</sup>C NMR (151 MHz, CDCl<sub>3</sub>)** δ 168.5, 163.9, 159.1, 150.3, 144.1, 131.4, 129.0, 126.6, 125.8, 124.1, 124.1, 122.5, 120.9, 112.4, 108.8, 63.3, 43.0, 38.1, 36.7, 26.8, 16.0, 14.2.

**HRMS (ESI)** Calcd. for C<sub>22</sub>H<sub>19</sub>NO<sub>5</sub>Na<sup>+</sup> (M+Na)<sup>+</sup> 400.1155, found 400.1156.

**ethyl 1',5-dimethyl-2,2'-dioxo-2H-spiro[cyclopropa[c]chromene-1,3'-indoline]-1a(7bH)-carboxylate (5c)**

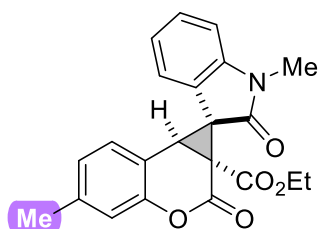

It was purified by flash chromatography (petroleum ether /EtOAc, 5:1) to afford white solid (36.1 mg, 96% yield); m.p. 186.3-188.5 °C.

**<sup>1</sup>H NMR (400 MHz, CDCl<sub>3</sub>)** δ 7.39 – 7.33 (m, 1H), 7.17 (d, *J* = 7.7 Hz, 1H), 7.11 – 7.05 (m, 1H), 7.04 – 7.00 (m, 1H), 6.97 (d, *J* = 1.7 Hz, 1H), 6.96 – 6.92 (m, 1H), 6.92 – 6.87 (m, 1H), 4.27 (qd, *J* = 7.1, 0.9 Hz, 2H), 3.84 (s, 1H), 3.15 (s, 3H), 2.35 (s, 3H), 1.20 (t, *J* = 7.1 Hz, 3H).

**<sup>13</sup>C NMR (151 MHz, CDCl<sub>3</sub>)** δ 168.5, 163.9, 159.3, 151.9, 144.0, 140.4, 129.0, 128.8, 125.6, 124.1, 122.5, 120.9, 116.8, 109.7, 108.8, 63.3, 43.0, 38.2, 36.3, 26.8, 21.5, 14.1.

**HRMS (ESI)** Calcd. for C<sub>22</sub>H<sub>19</sub>NO<sub>5</sub>Na<sup>+</sup> (M+Na)<sup>+</sup> 400.1155, found 400.1158.

**ethyl 5-bromo-1'-methyl-2,2'-dioxo-2H-spiro[cyclopropa[c]chromene-1,3'-indoline]-1a(7bH)-carboxylate (5d)**

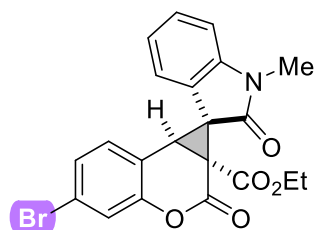

It was purified by flash chromatography (petroleum ether /EtOAc, 5:1) to afford white solid (33.9 mg, 77% yield); m.p. 189.2-190.8 °C.

**<sup>1</sup>H NMR (400 MHz, CDCl<sub>3</sub>)** δ 7.41 – 7.34 (m, 1H), 7.32 (d, *J* = 1.9 Hz, 1H), 7.26 – 7.24 (m, 1H), 7.17 (d, *J* = 8.2 Hz, 1H), 7.12 – 7.06 (m, 1H), 7.05 – 7.01 (m, 1H), 6.94 – 6.88 (m, 1H), 4.27 (qd, *J* = 7.1, 1.6 Hz, 2H), 3.83 (s, 1H), 3.16 (s, 3H), 1.21 (t, *J* = 7.1 Hz, 3H).

**<sup>13</sup>C NMR (151 MHz, CDCl<sub>3</sub>)** δ 168.4, 163.5, 158.4, 152.4, 144.1, 130.3, 129.3, 127.9, 123.6, 123.0, 122.7, 121.0, 119.8, 112.0, 109.0, 63.5, 42.6, 38.3, 35.7, 26.8, 14.1.

**HRMS (ESI)** Calcd. for C<sub>21</sub>H<sub>16</sub>BrNO<sub>5</sub>Na<sup>+</sup> (M+Na)<sup>+</sup> 464.0104, 466.0084, found 464.0106, 466.0085.

**ethyl 1',7-dimethyl-2,2'-dioxo-2H-spiro[cyclopropa[c]chromene-1,3'-indoline]-1a(7bH)-carboxylate (5e)**

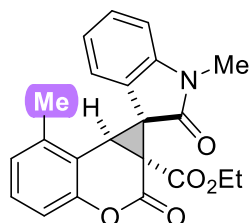

It was purified by flash chromatography (petroleum ether /EtOAc, 5:1) to afford white solid (35.2 mg, 93% yield); m.p. 178.5-179.7 °C.

**<sup>1</sup>H NMR (400 MHz, CDCl<sub>3</sub>)** δ 7.39 – 7.32 (m, 1H), 7.17 (d, *J* = 7.7 Hz, 1H), 7.10 – 7.05 (m, 1H), 7.04 – 7.00 (m, 1H), 6.97 (d, *J* = 1.7 Hz, 1H), 6.95 – 6.92 (m, 1H), 6.92 – 6.88 (m, 1H), 4.27 (qd, *J* = 7.1, 0.9 Hz, 2H), 3.84 (s, 1H), 3.16 (s, 3H), 2.35 (s, 3H), 1.20 (t, *J* = 7.1 Hz, 3H).

**<sup>13</sup>C NMR (151 MHz, CDCl<sub>3</sub>)** δ 168.5, 163.9, 159.3, 151.9, 144.1, 140.5, 129.0, 128.8, 125.7, 124.1, 122.5, 120.9, 116.9, 109.7, 108.8, 63.3, 43.0, 38.2, 36.3, 26.8, 21.5, 14.2.

**HRMS (ESI)** Calcd. for C<sub>22</sub>H<sub>19</sub>NO<sub>5</sub>Na<sup>+</sup> (M+Na)<sup>+</sup> 400.1155, found 400.1152.

**1a-acetyl-1'-methyl-1a,7b-dihydro-2H-spiro[cyclopropa[c]chromene-1,3'-indoline]-2,2'-dione (5f)**

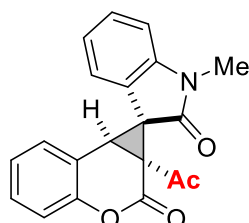

It was purified by flash chromatography (petroleum ether /EtOAc, 5:1) to afford white solid (28.7 mg, 86% yield); m.p. 168.4-169.9 °C.

**<sup>1</sup>H NMR (400 MHz, CDCl<sub>3</sub>)** δ 7.41 – 7.35 (m, 1H), 7.35 – 7.32 (m, 1H), 7.32 – 7.28 (m, 1H), 7.18 – 7.10 (m, 2H), 7.10 – 7.05 (m, 1H), 6.95 – 6.91 (m, 1H), 6.89 – 6.84 (m, 1H), 4.00 (s, 1H), 3.18 (s, 3H), 2.44 (s, 3H).

**<sup>13</sup>C NMR (151 MHz, CDCl<sub>3</sub>)** δ 197.3, 168.4, 160.9, 151.9, 144.1, 129.8, 129.3, 129.2, 124.8, 123.0, 122.8, 121.0, 116.3, 113.3, 109.0, 49.4, 38.4, 34.6, 31.0, 26.8.

**HRMS (ESI)** Calcd. for C<sub>20</sub>H<sub>15</sub>NO<sub>4</sub>Na<sup>+</sup> (M+Na)<sup>+</sup> 356.0893, found 356.0892.

**1a-benzoyl-1'-methyl-1a,7b-dihydro-2H-spiro[cyclopropa[c]chromene-1,3'-indoline]-2,2'-dione (5g)**

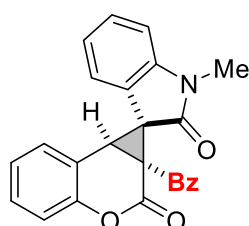

It was purified by flash chromatography (petroleum ether /EtOAc, 5:1) to afford white solid (32.5 mg, 82% yield); m.p. 172.3-175.1 °C.

**<sup>1</sup>H NMR (600 MHz, CDCl<sub>3</sub>)** δ 7.81 – 7.72 (m, 2H), 7.49 – 7.44 (m, 1H), 7.42 – 7.34 (m, 2H), 7.34 – 7.28 (m, 2H), 7.25 – 7.19 (m, 2H), 7.19 – 7.14 (m, 1H), 6.91 – 6.82 (m, 2H), 6.58 (d, *J* = 7.6 Hz, 1H), 3.90 (s, 1H), 3.24 (s, 3H).

**<sup>13</sup>C NMR (151 MHz, CDCl<sub>3</sub>)** δ 189.2, 168.7, 160.1, 151.9, 143.5, 135.4, 134.2, 130.2, 130.0, 129.3, 128.8, 128.5, 124.9, 124.1, 122.6, 121.0, 116.6, 113.0, 108.9, 46.6, 38.3, 36.3, 27.0.

**HRMS (ESI)** Calcd. for C<sub>25</sub>H<sub>17</sub>NO<sub>4</sub>Na<sup>+</sup> (M+Na)<sup>+</sup> 418.1050, found 418.1050.

**tert-butyl 5'-bromo-1'-methyl-2,2'-dioxo-2H-spiro[cyclopropa[c]chromene-1,3'-indoline]-1a(7bH)-carboxylate (5h)**

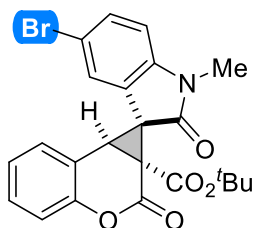

It was purified by flash chromatography (petroleum ether /EtOAc, 5:1) to afford white solid (32.7 mg, 74% yield); m.p. 175.9-178.3 °C.

$^1\text{H NMR}$  (400 MHz,  $\text{CDCl}_3$ )  $\delta$  7.48 (dd,  $J = 8.3, 1.9$  Hz, 1H), 7.38 – 7.31 (m, 1H), 7.29 (dd,  $J = 7.6, 1.6$  Hz, 1H), 7.21 (d,  $J = 1.9$  Hz, 1H), 7.17 – 7.09 (m, 2H), 6.78 (d,  $J = 8.3$  Hz, 1H), 3.82 (s, 1H), 3.13 (s, 3H), 1.47 (s, 9H).

$^{13}\text{C NMR}$  (151 MHz,  $\text{CDCl}_3$ )  $\delta$  168.1, 162.3, 158.8, 152.1, 143.0, 131.6, 130.0, 129.2, 126.2, 124.7, 124.6, 116.5, 115.0, 112.6, 110.1, 85.2, 44.0, 37.7, 36.6, 28.0, 26.9.

**HRMS (ESI)** Calcd. for  $\text{C}_{21}\text{H}_{16}\text{BrNO}_5\text{Na}^+$  ( $\text{M}+\text{Na}$ ) $^+$  464.0104, 466.0084, found 464.0105, 466.0087.

## 5. Scale-up experiment

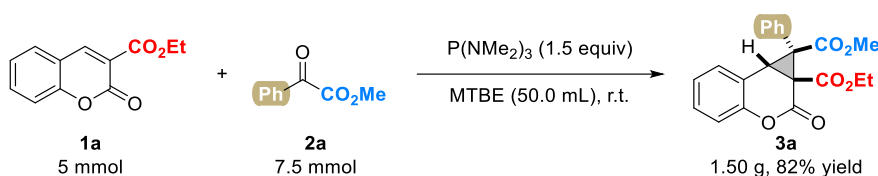

In an ordinary vial charged with a magnetic stirring bar, coumarins **1a** (5 mmol, 1.0 equiv), benzoylformates **2a** (7.5 mmol, 1.5 equiv),  $\text{P}(\text{NMe}_2)_3$  (7.5 mmol, 1.5 equiv) and MTBE (50 mL) was added. The reaction was performed without the requirement of anhydrous or inert atmosphere conditions, and then the mixture was stirred at r.t. for 10 h. the products **3a** were isolated by flash chromatography on silica gel.

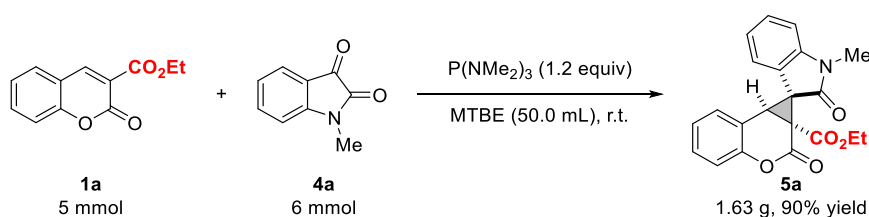

In an ordinary vial charged with a magnetic stirring bar, coumarins **1a** (5 mmol, 1.0 equiv), isatins **4a** (6 mmol, 1.2 equiv),  $\text{P}(\text{NMe}_2)_3$  (6 mmol, 1.2 equiv) and MTBE (50 mL) was added. The reaction was performed without the requirement of anhydrous or inert atmosphere conditions, and then the mixture was stirred at r.t. for 18 h. the products **5a** were isolated by flash chromatography on silica gel.

## 6. X-ray crystal data for compound **3v**

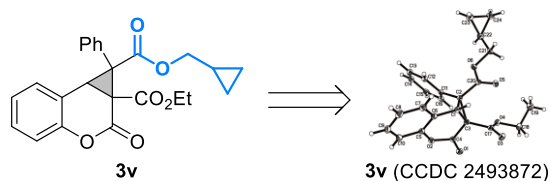

|                                             |                                                               |
|---------------------------------------------|---------------------------------------------------------------|
| Identific code                              | <b>3v</b>                                                     |
| Empirical formula                           | C <sub>24</sub> H <sub>22</sub> O <sub>6</sub>                |
| Formula weight                              | 406.41                                                        |
| Temperature/K                               | 276.36(10)                                                    |
| Crystal system                              | triclinic                                                     |
| Space group                                 | P-1                                                           |
| a/Å                                         | 9.6132(3)                                                     |
| b/Å                                         | 9.9563(3)                                                     |
| c/Å                                         | 11.4160(3)                                                    |
| α/°                                         | 78.958(2)                                                     |
| β/°                                         | 70.028(3)                                                     |
| γ/°                                         | 86.994(3)                                                     |
| Volume/Å <sup>3</sup>                       | 1007.82(5)                                                    |
| Z                                           | 2                                                             |
| ρ <sub>calc</sub> /cm <sup>3</sup>          | 1.339                                                         |
| μ/mm <sup>-1</sup>                          | 0.096                                                         |
| F(000)                                      | 428.0                                                         |
| Crystal size/mm <sup>3</sup>                | 0.16 × 0.12 × 0.1                                             |
| Radiation                                   | Mo Kα (λ = 0.71073)                                           |
| 2θ range for data collection/°              | 4.508 to 52.742                                               |
| Index ranges                                | -11 ≤ h ≤ 12, -12 ≤ k ≤ 11, -14 ≤ l ≤ 14                      |
| Reflections collected                       | 19923                                                         |
| Independent reflections                     | 4113 [R <sub>int</sub> = 0.0297, R <sub>sigma</sub> = 0.0216] |
| Data/restraints/parameters                  | 4113/0/272                                                    |
| Goodness-of-fit on F <sup>2</sup>           | 1.051                                                         |
| Final R indexes [I ≥ 2σ (I)]                | R <sub>1</sub> = 0.0336, wR <sub>2</sub> = 0.0851             |
| Final R indexes [all data]                  | R <sub>1</sub> = 0.0395, wR <sub>2</sub> = 0.0889             |
| Largest diff. peak/hole / e Å <sup>-3</sup> | 0.24/-0.20                                                    |

## 7. X-ray crystal data for compound **5g**

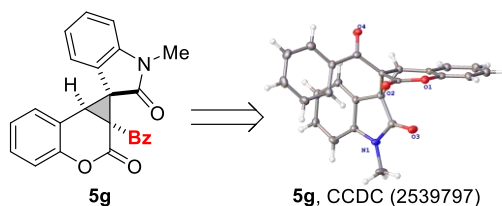

|                                             |                                                                 |
|---------------------------------------------|-----------------------------------------------------------------|
| Identific code                              | <b>5g</b>                                                       |
| Empirical formula                           | C <sub>26</sub> H <sub>19</sub> Cl <sub>2</sub> NO <sub>4</sub> |
| Formula weight                              | 480.32                                                          |
| Temperature/K                               | 120.02(10)                                                      |
| Crystal system                              | monoclinic                                                      |
| Space group                                 | P2 <sub>1</sub>                                                 |
| a/Å                                         | 8.86524(12)                                                     |
| b/Å                                         | 25.0306(3)                                                      |
| c/Å                                         | 10.59161(15)                                                    |
| α/°                                         | 90                                                              |
| β/°                                         | 108.1518(15)                                                    |
| γ/°                                         | 90                                                              |
| Volume/Å <sup>3</sup>                       | 2233.34(6)                                                      |
| Z                                           | 4                                                               |
| ρ <sub>calc</sub> /cm <sup>3</sup>          | 1.429                                                           |
| μ/mm <sup>-1</sup>                          | 2.905                                                           |
| F(000)                                      | 992.0                                                           |
| Crystal size/mm <sup>3</sup>                | 0.15 × 0.13 × 0.1                                               |
| Radiation                                   | Cu Kα (λ = 1.54184)                                             |
| 2θ range for data collection/°              | 7.064 to 149.272                                                |
| Index ranges                                | -9 ≤ h ≤ 10, -31 ≤ k ≤ 30, -13 ≤ l ≤ 13                         |
| Reflections collected                       | 23985                                                           |
| Independent reflections                     | 8200 [R <sub>int</sub> = 0.0356, R <sub>sigma</sub> = 0.0225]   |
| Data/restraints/parameters                  | 8200/15/625                                                     |
| Goodness-of-fit on F <sup>2</sup>           | 1.037                                                           |
| Final R indexes [I ≥ 2σ (I)]                | R <sub>1</sub> = 0.0728, wR <sub>2</sub> = 0.1980               |
| Final R indexes [all data]                  | R <sub>1</sub> = 0.0733, wR <sub>2</sub> = 0.1986               |
| Largest diff. peak/hole / e Å <sup>-3</sup> | 1.05/-0.46                                                      |

8. The copies of <sup>1</sup>H NMR and <sup>13</sup>C NMR for compounds 3a-3x, 5a-5h.

1a-ethyl 1-methyl 2-oxo-1-phenyl-1,7b-dihydrocyclopropa[c]chromene-1,1a(2H)-dicarboxylate (3a)

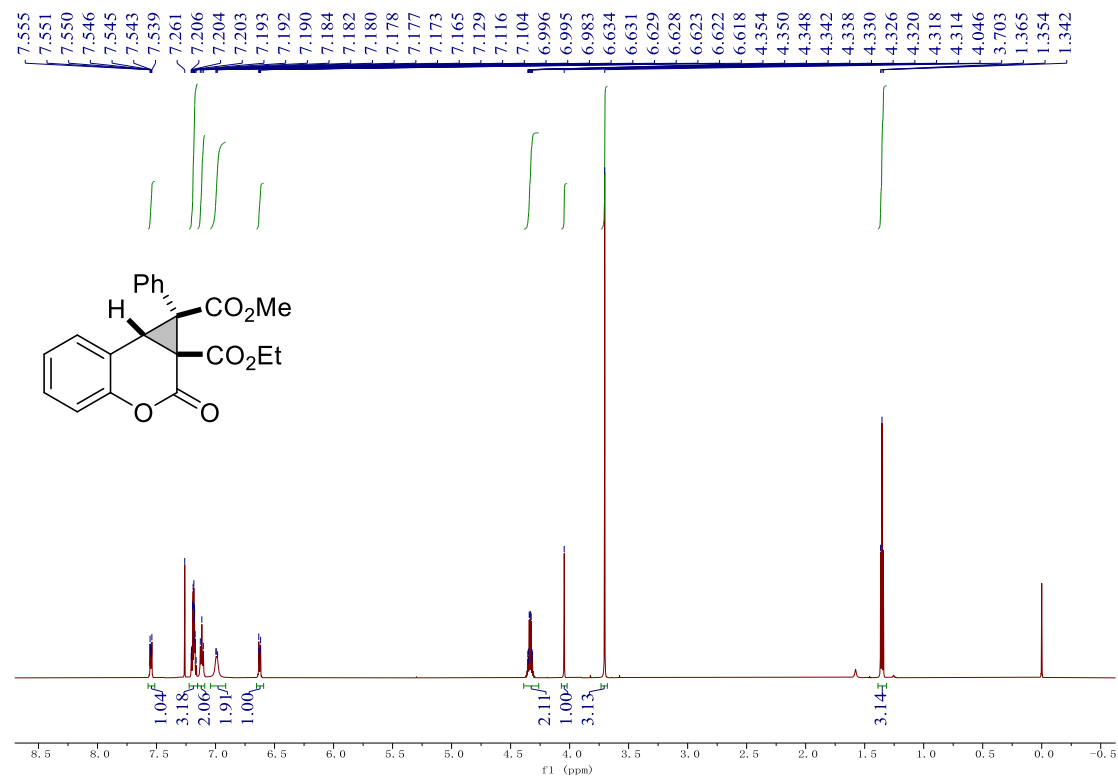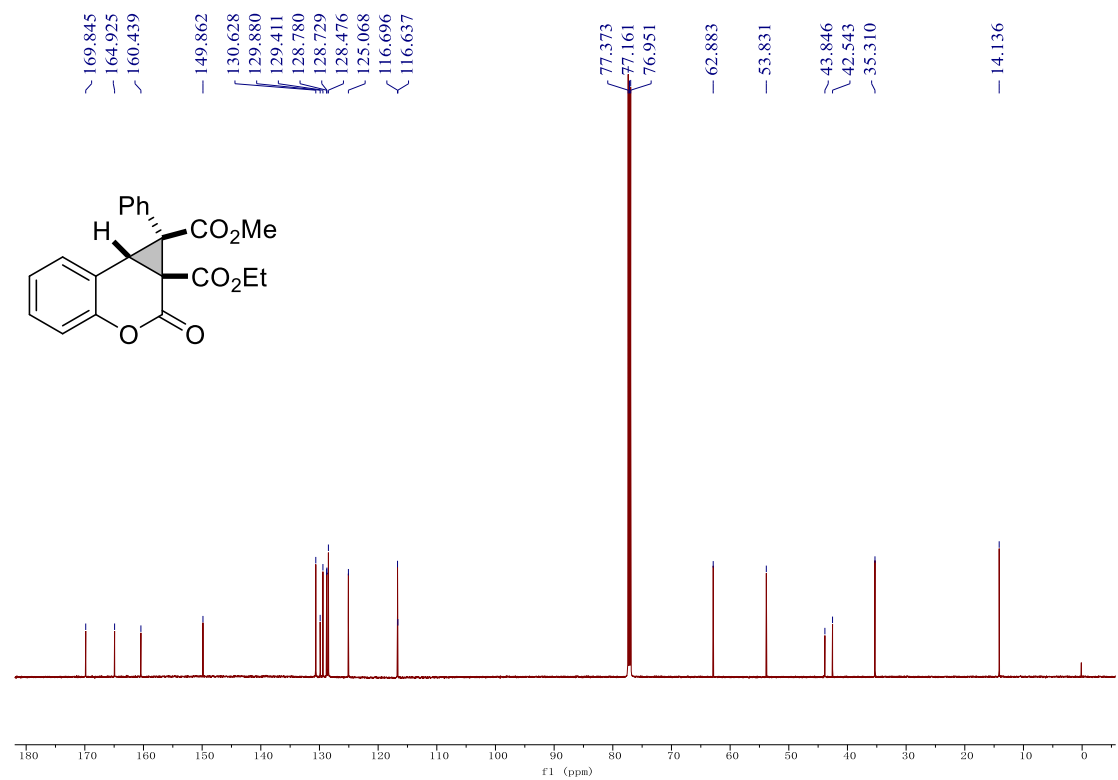

**dimethyl 2-oxo-1-phenyl-1,7b-dihydrocyclopropa[c]chromene-1,1a(2H)-dicarboxylate (3b)**

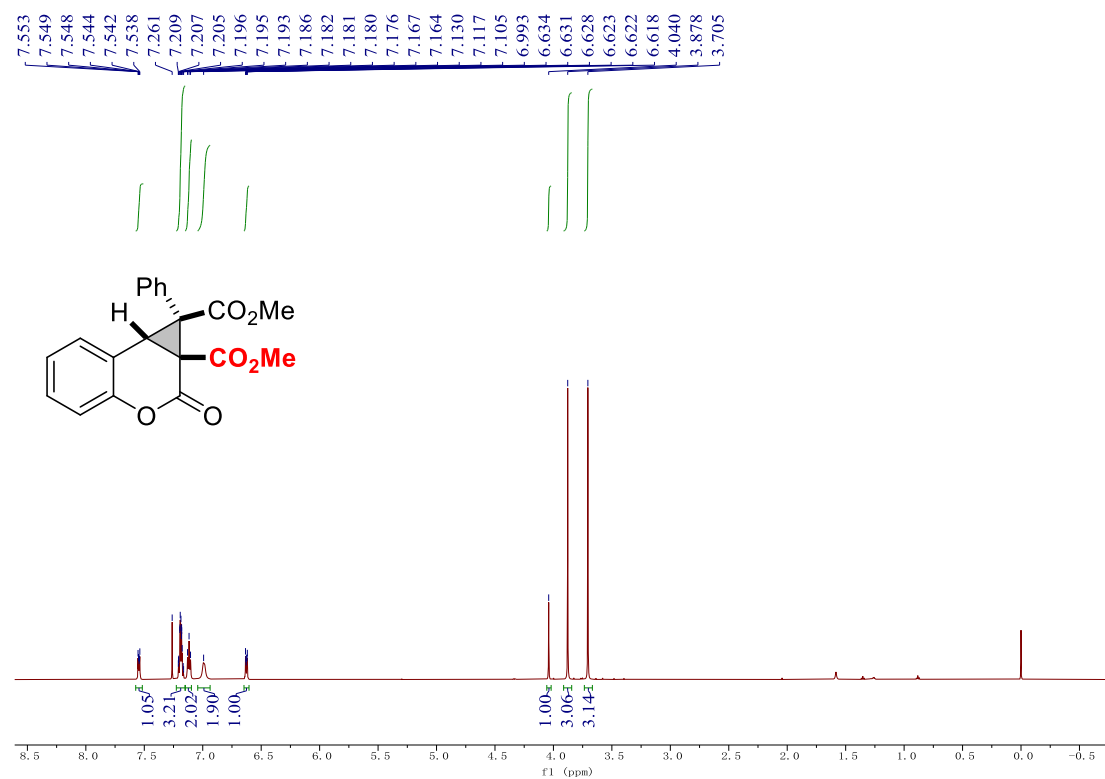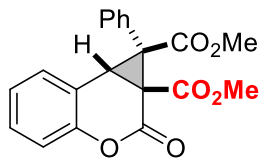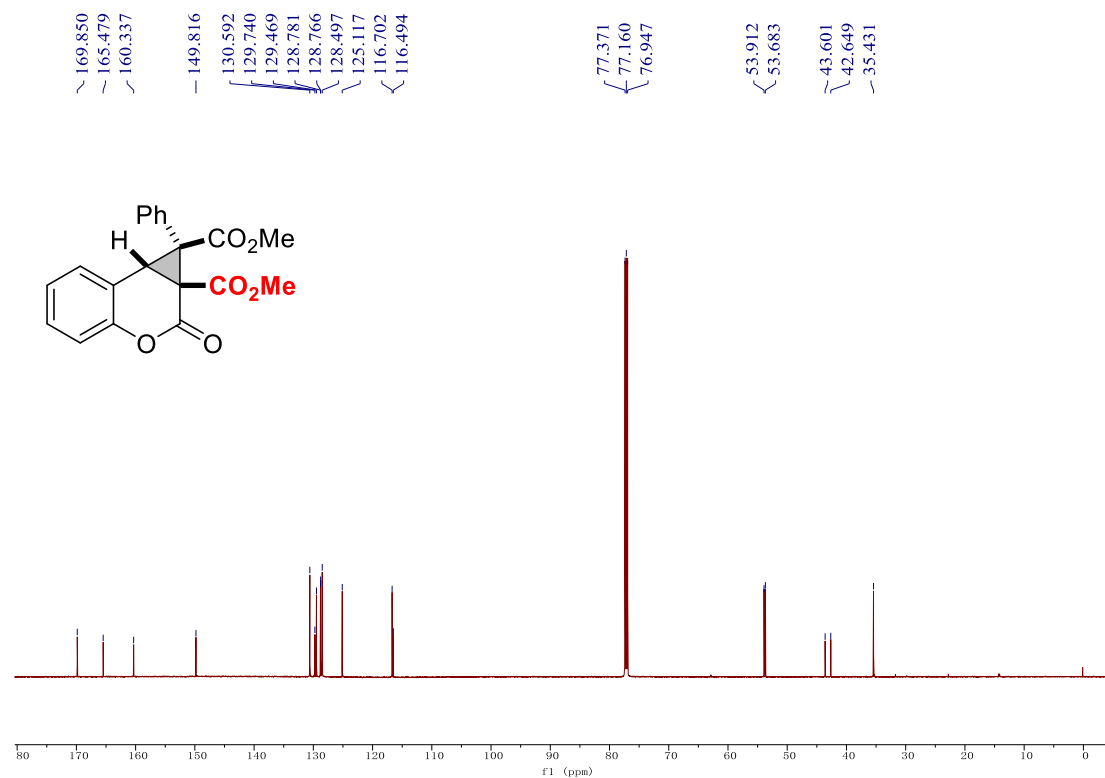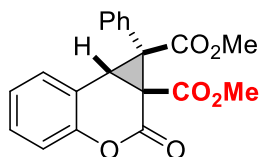

**1a-(tert-butyl) 1-methyl 2-oxo-1-phenyl-1,7b-dihydrocyclopropa[c]chromene-1,1a(2H)-dicarboxylate (3c)**

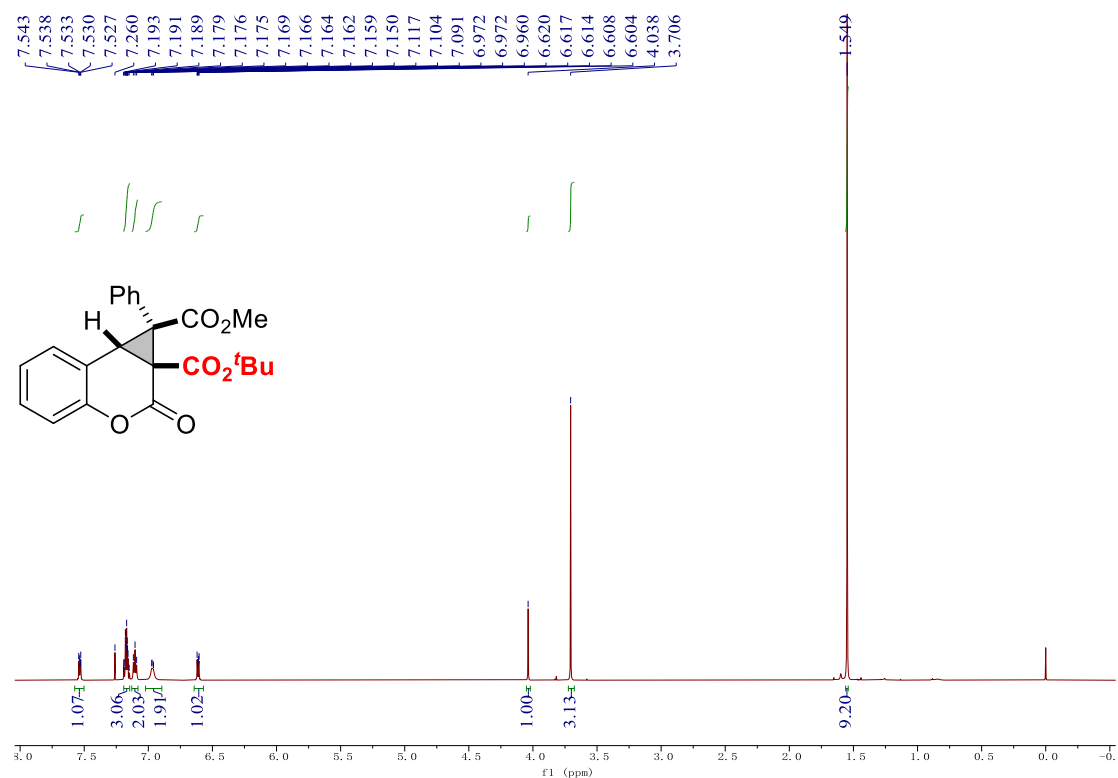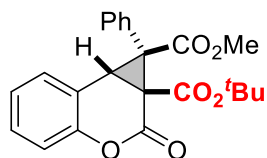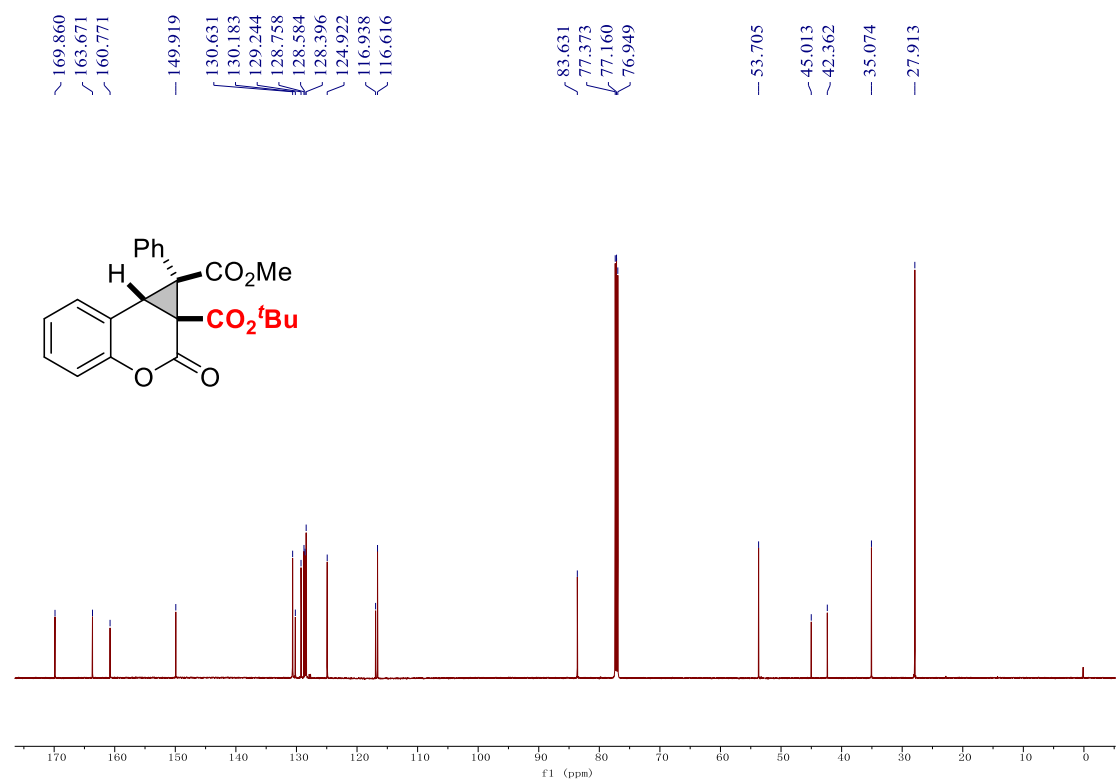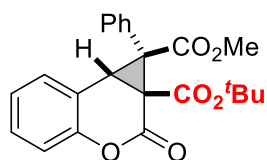

**methyl 1a-benzoyl-2-oxo-1-phenyl-1,1a,2,7b-tetrahydrocyclopropa[c]chromene-1-carboxylate (3d)**

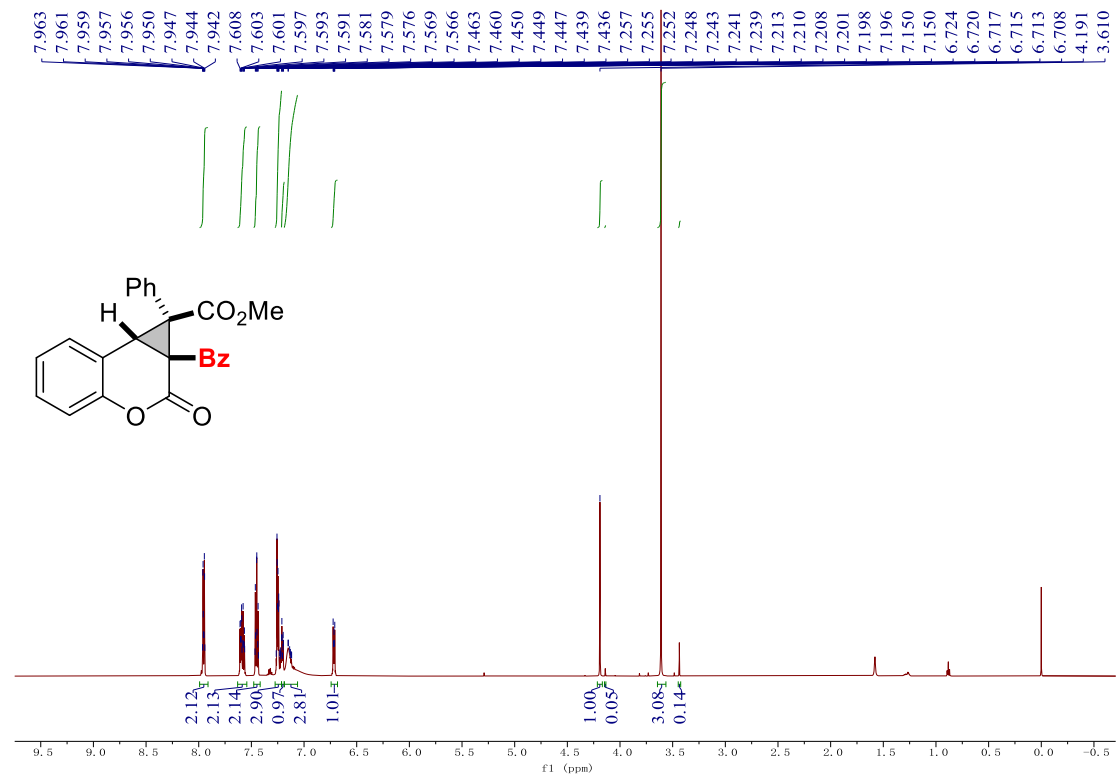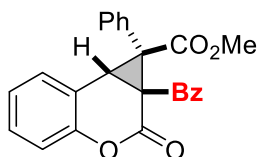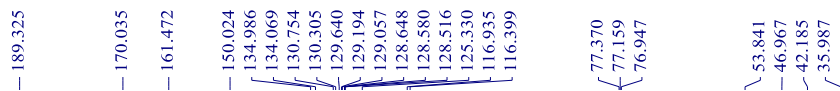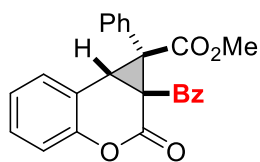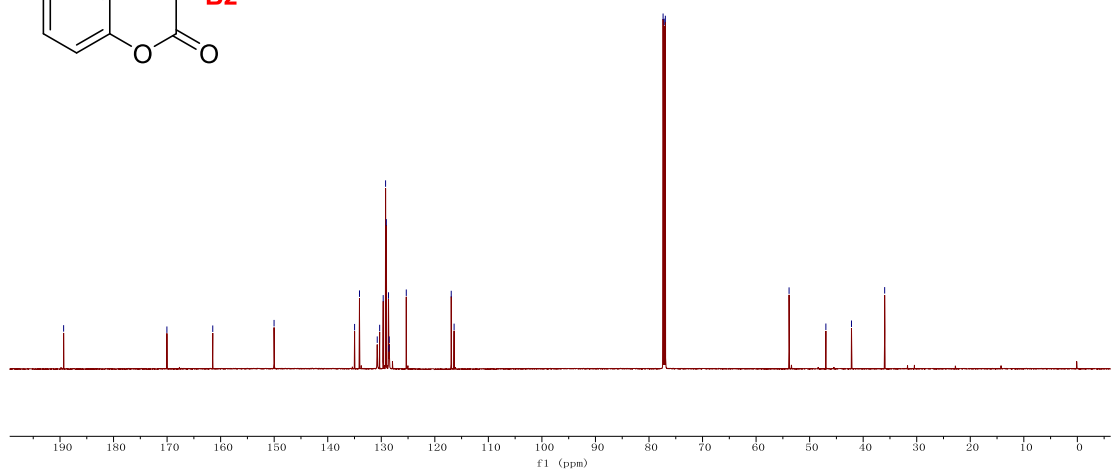

methyl 1a-acetyl-2-oxo-1-phenyl-1,1a,2,7b-tetrahydrocyclopropa[*c*]chromene-1-carboxylate  
(3e)

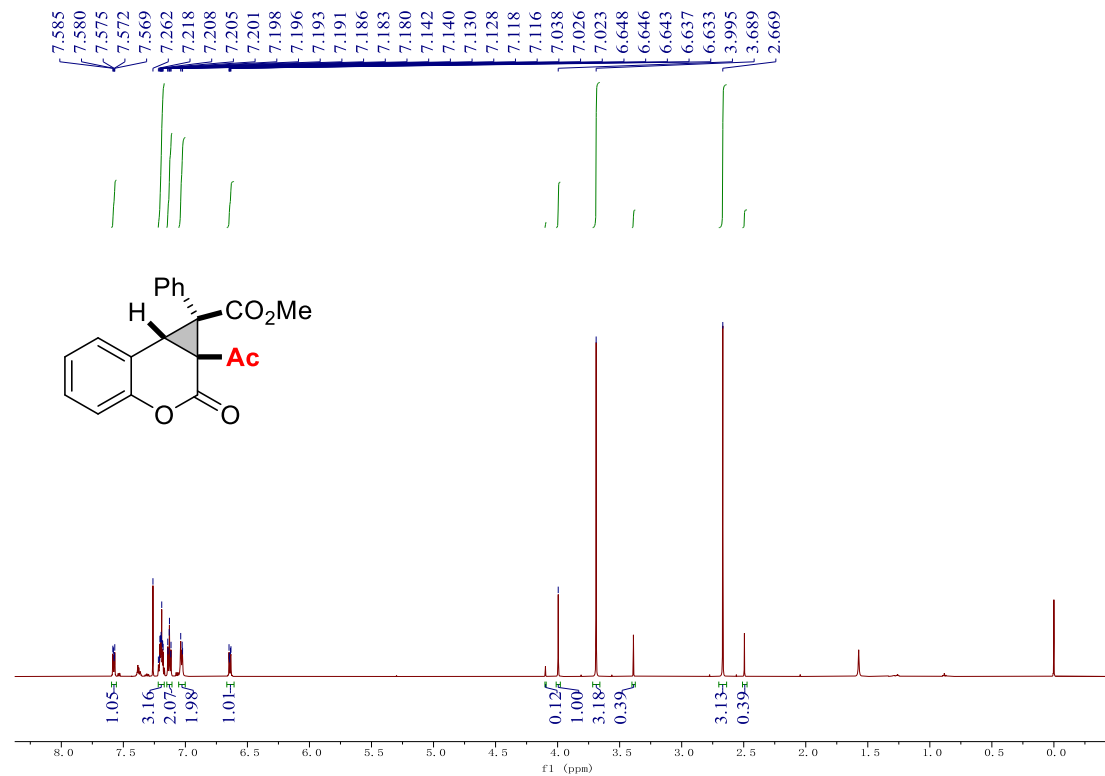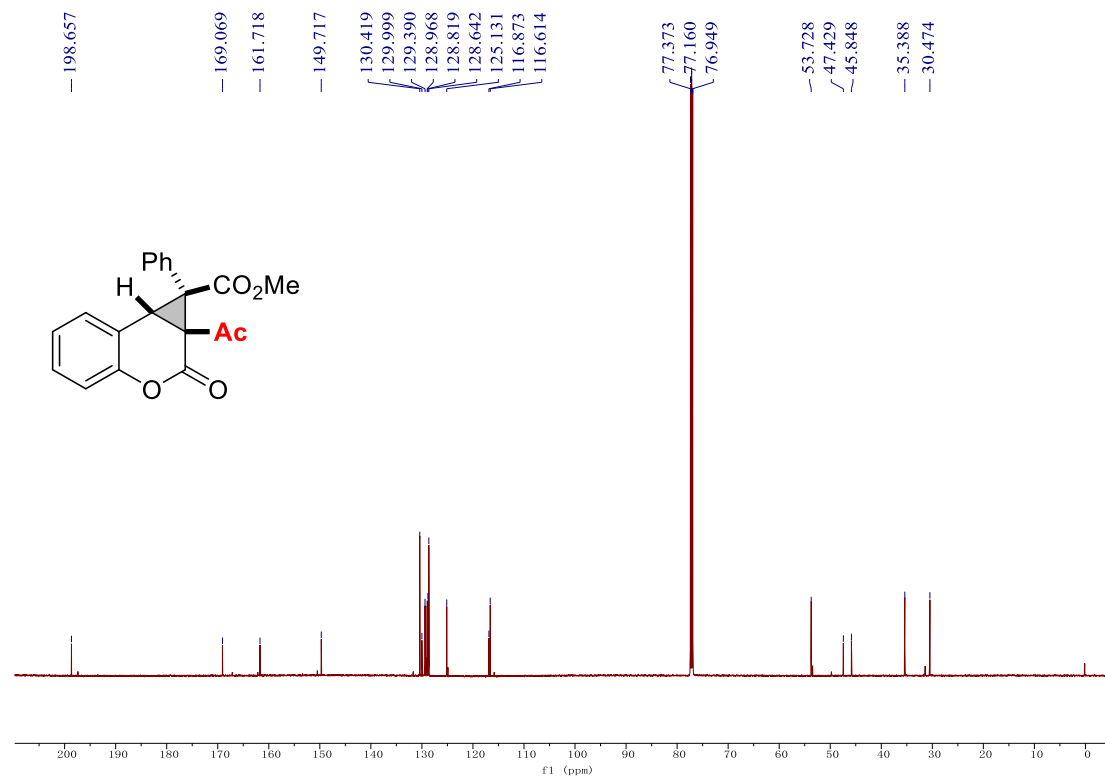

**1a-ethyl 1-methyl 4-methyl-2-oxo-1-phenyl-1,7b-dihydrocyclopropa[c]chromene-1,1a(2H)-dicarboxylate (3f)**

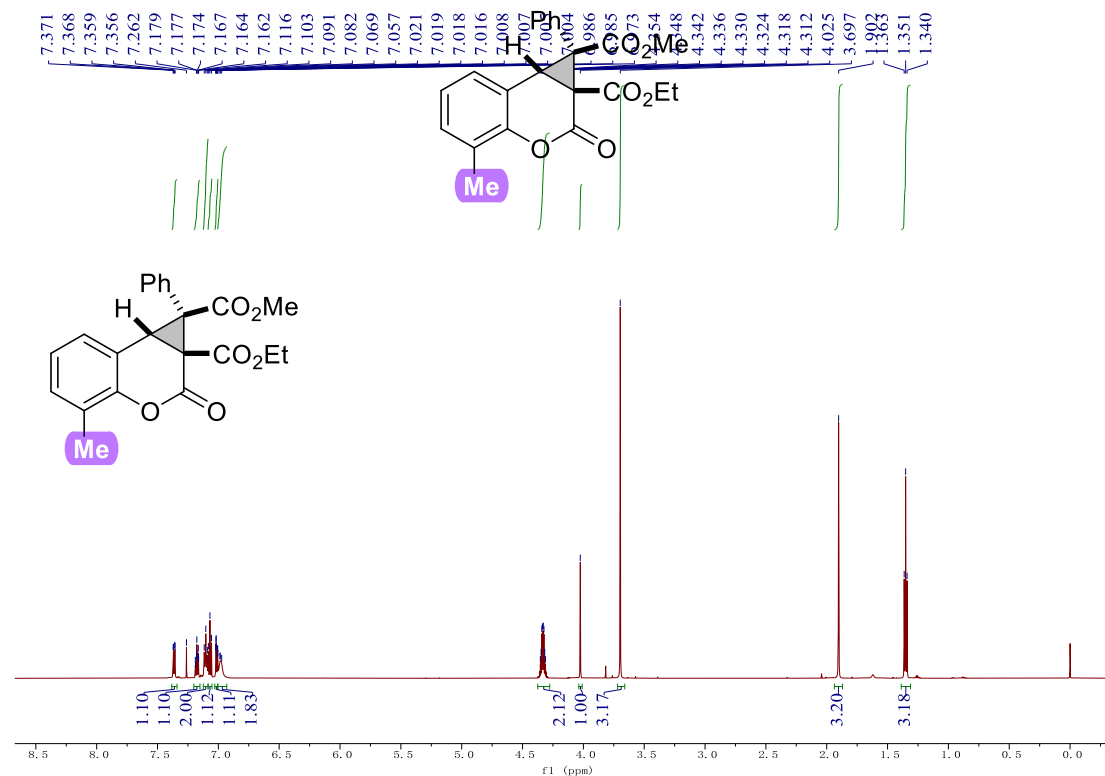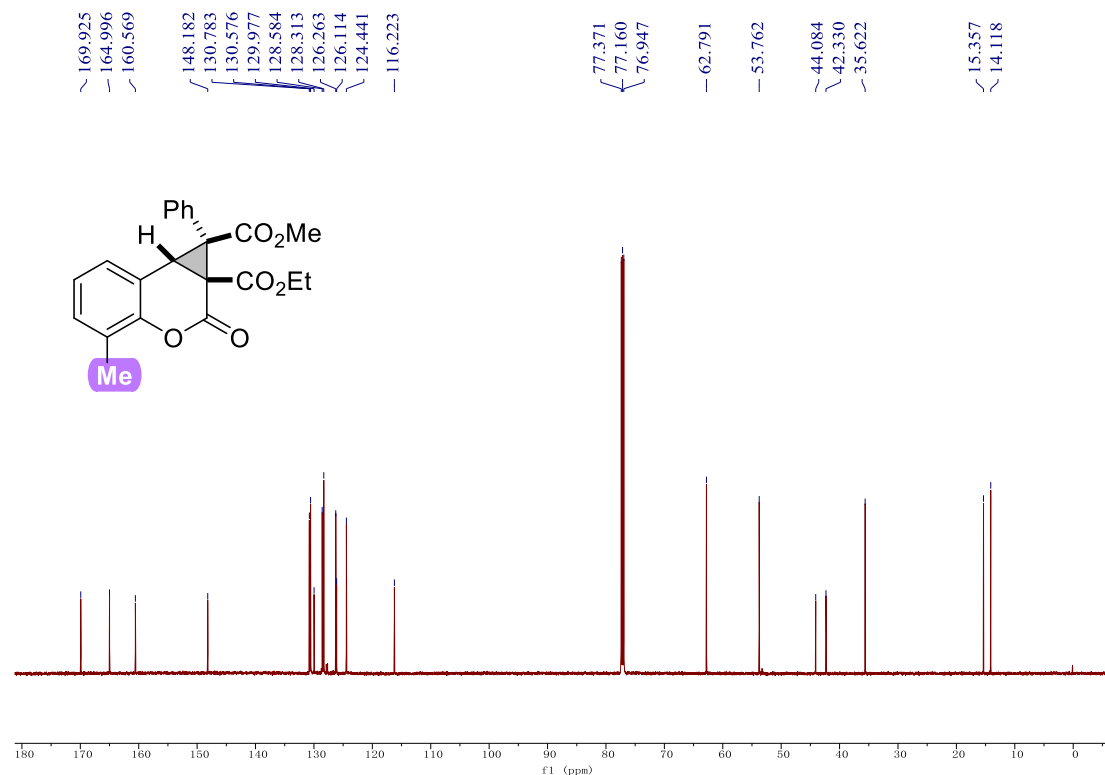

**1a-ethyl 1-methyl 5-methyl-2-oxo-1-phenyl-1,7b-dihydrocyclopropa[c]chromene-1,1a(2H)-dicarboxylate (3g)**

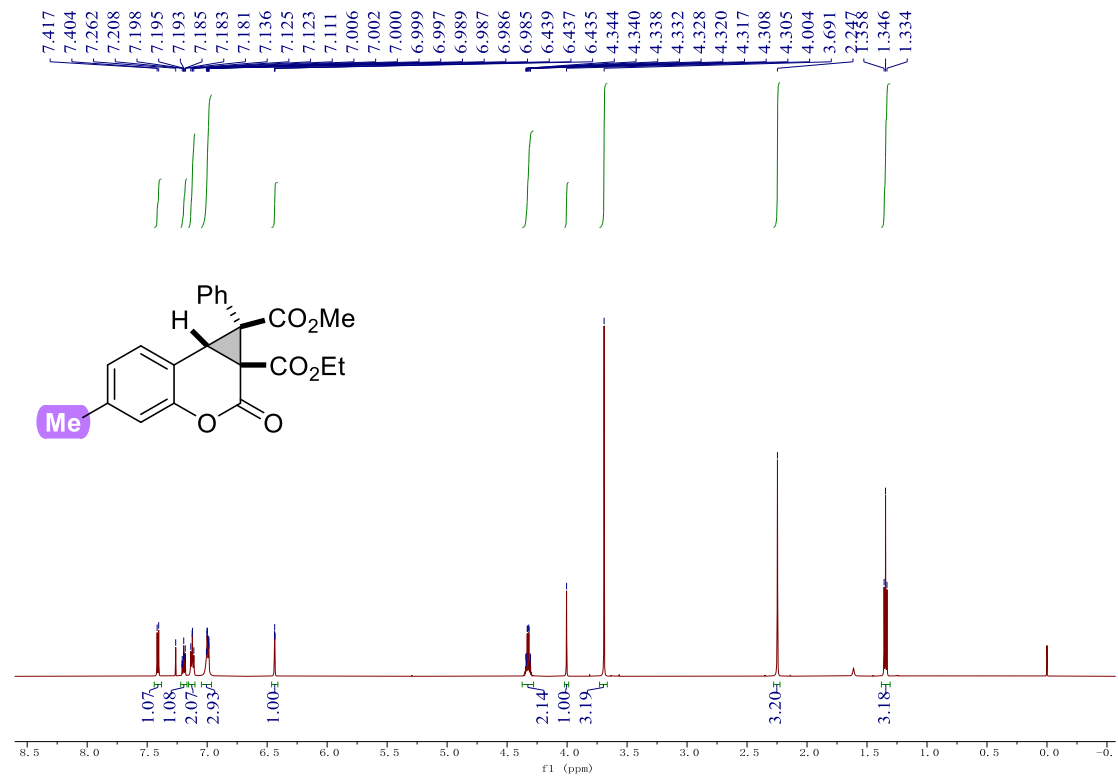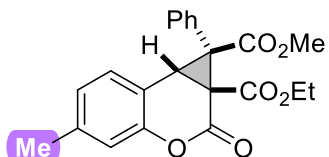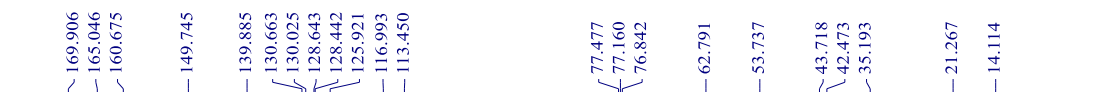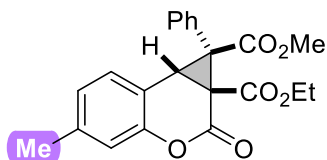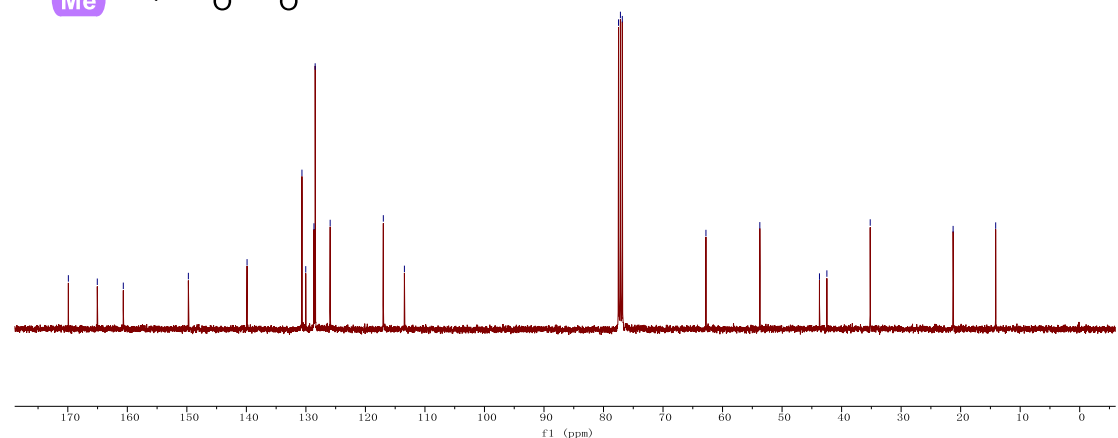

**1a-ethyl 1-methyl 5-bromo-2-oxo-1-phenyl-1,7b-dihydrocyclopropa[c]chromene-1,1a(2H)-dicarboxylate (3h)**

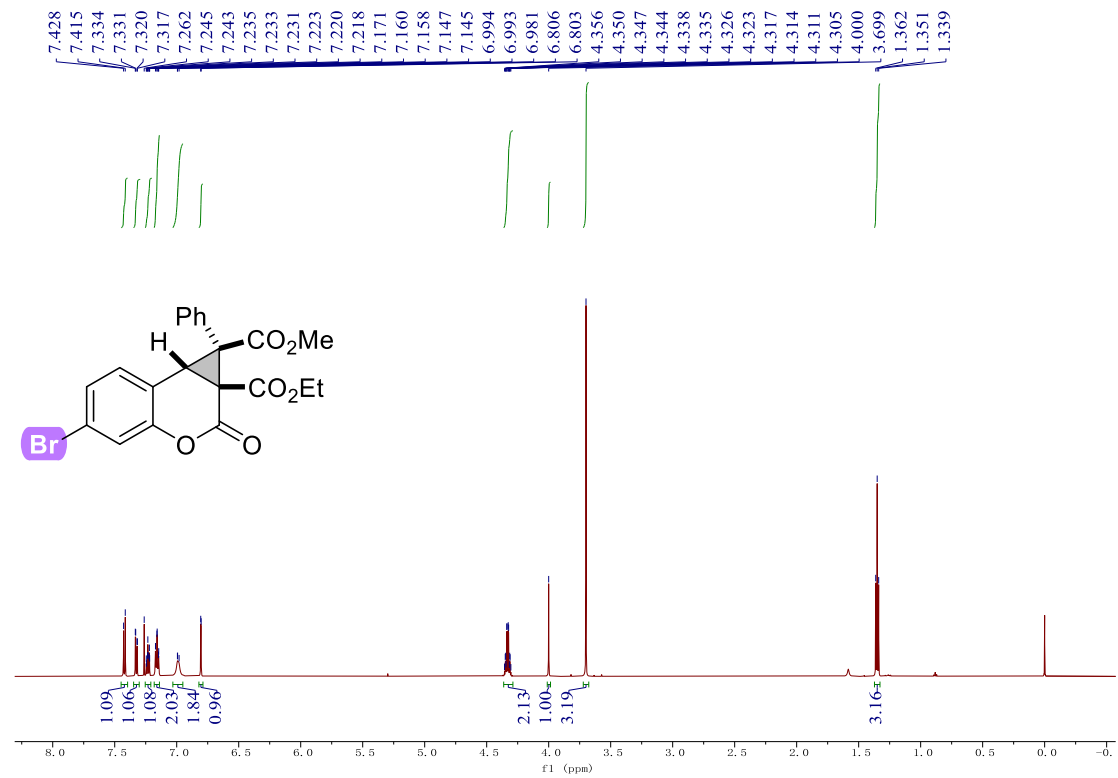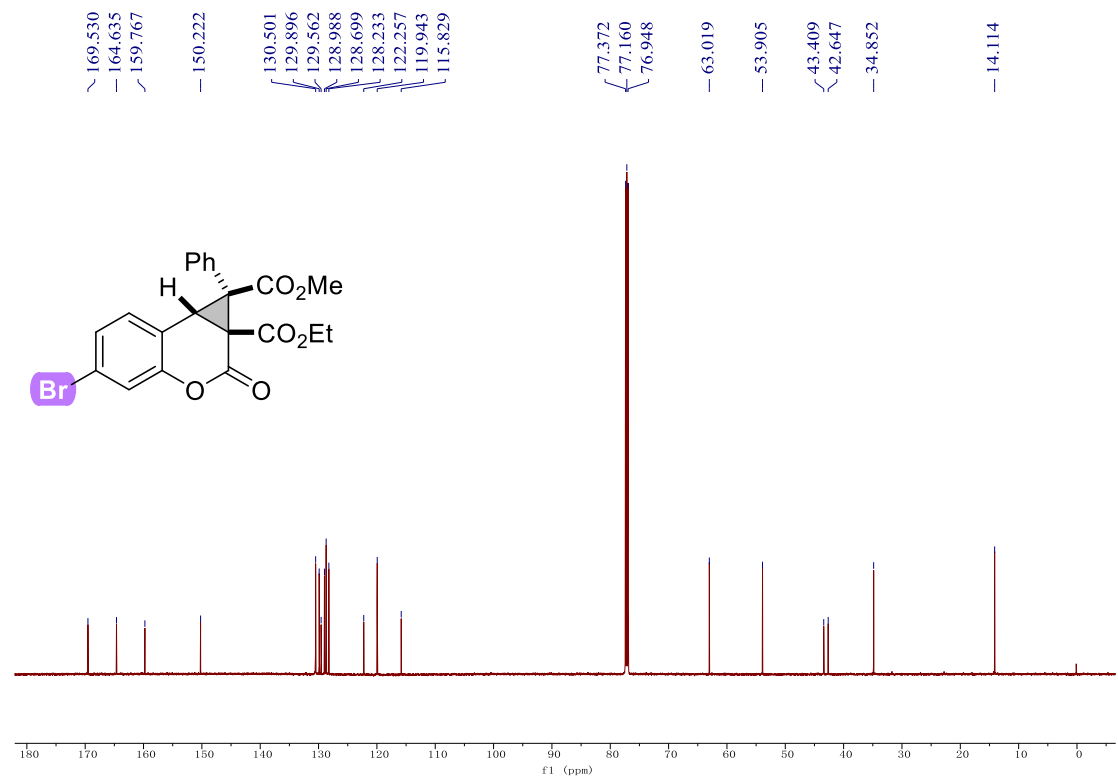

**1a-ethyl 1-methyl 6-methyl-2-oxo-1-phenyl-1,7b-dihydrocyclopropa[c]chromene-1,1a(2H)-dicarboxylate (3i)**

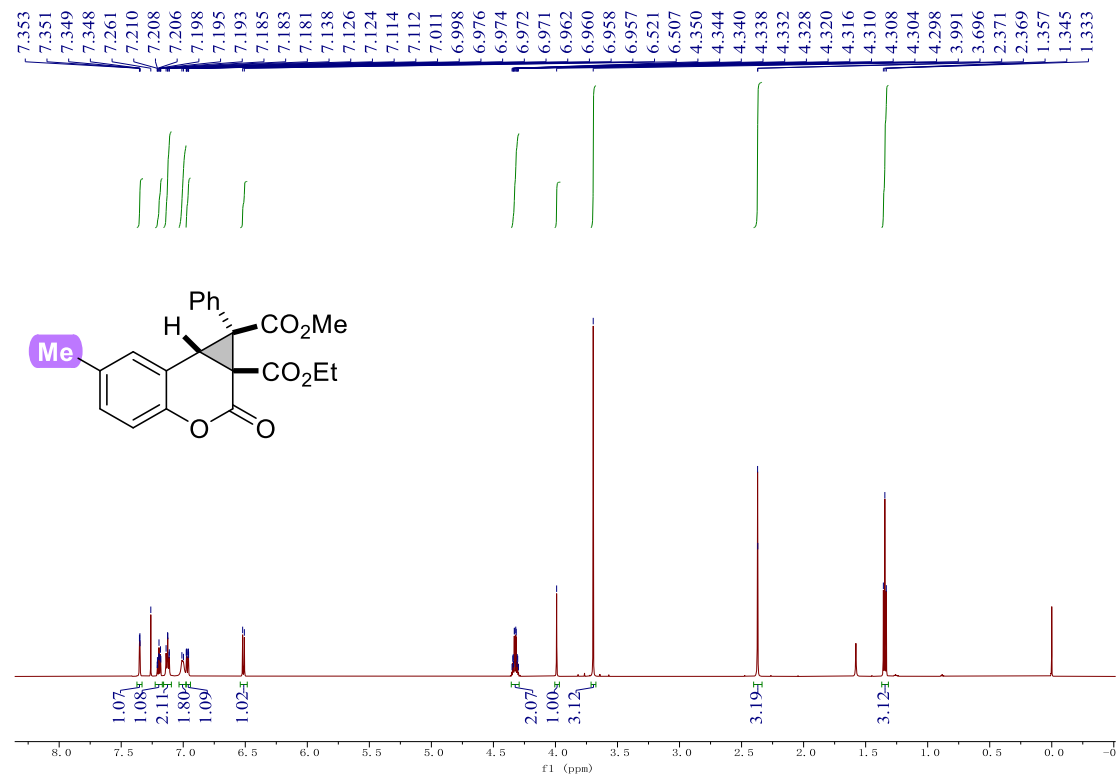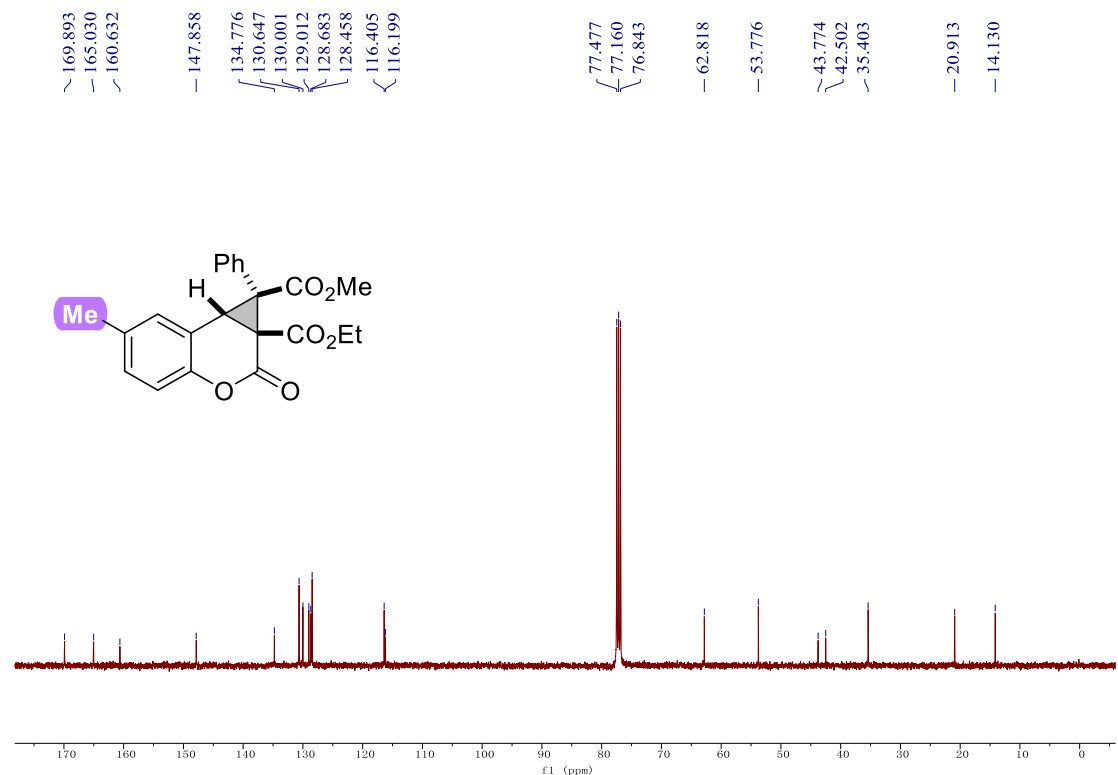

**1a-ethyl 1-methyl 6-bromo-2-oxo-1-phenyl-1,7b-dihydrocyclopropa[c]chromene-1,1a(2H)-dicarboxylate (3j)**

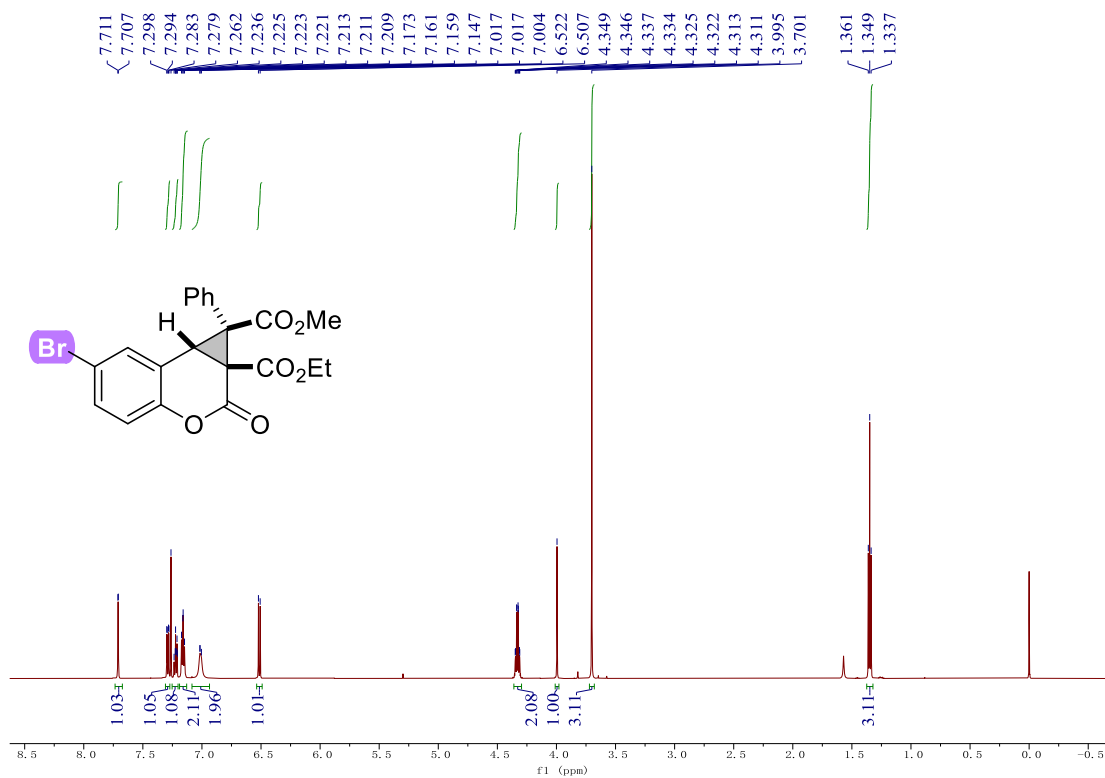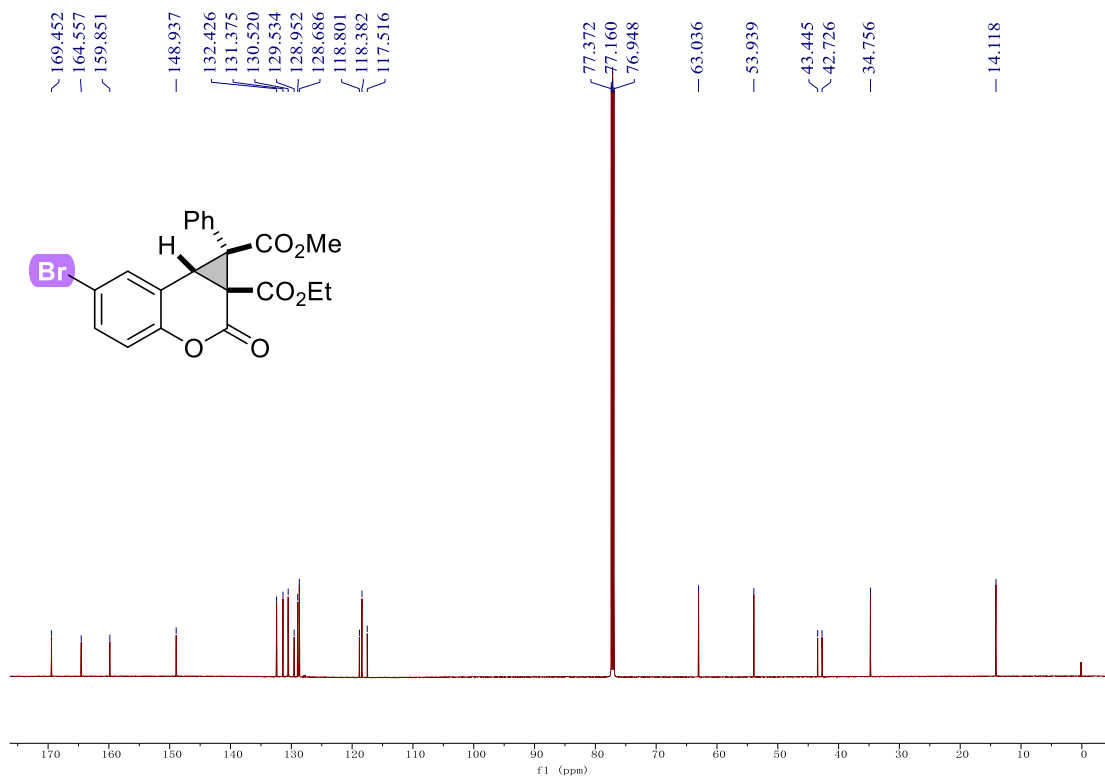

**1a-ethyl 1-methyl 6-chloro-2-oxo-1-phenyl-1,7b-dihydrocyclopropa[c]chromene-1,1a(2H)-dicarboxylate (3k)**

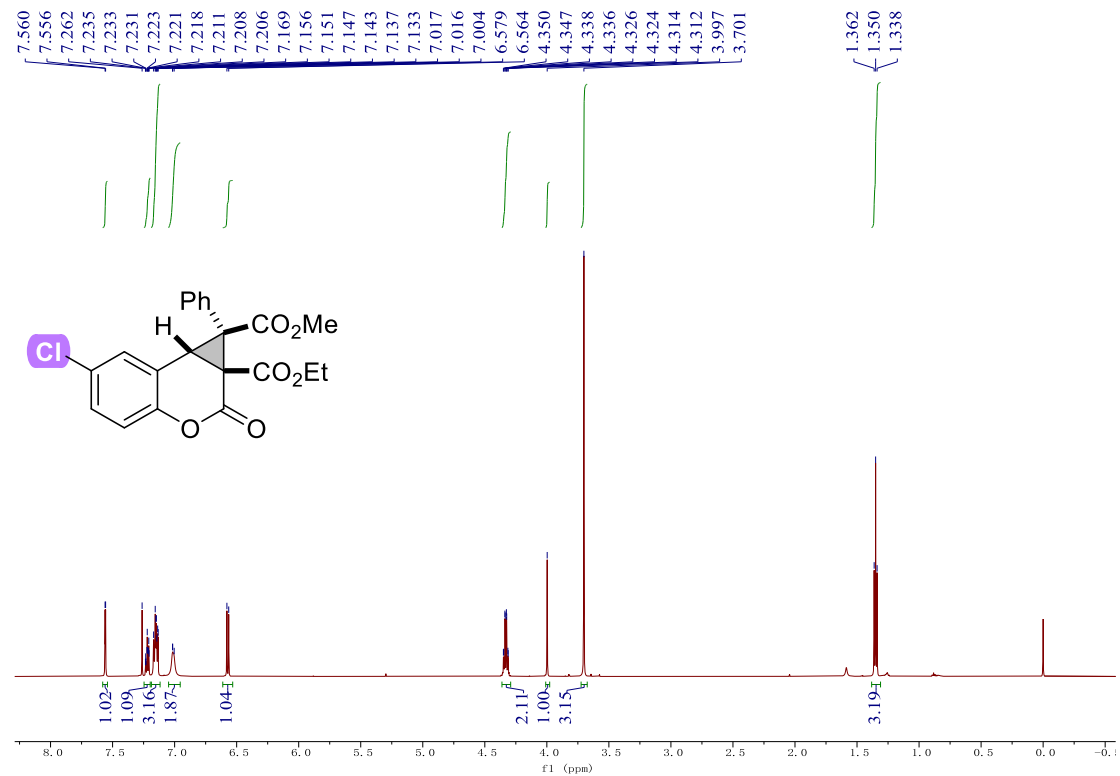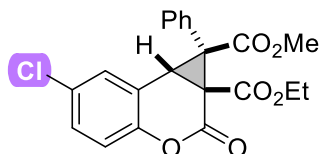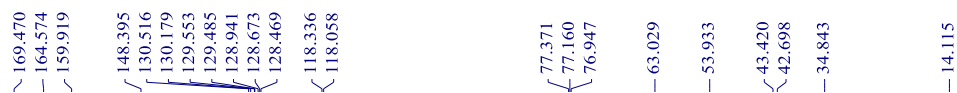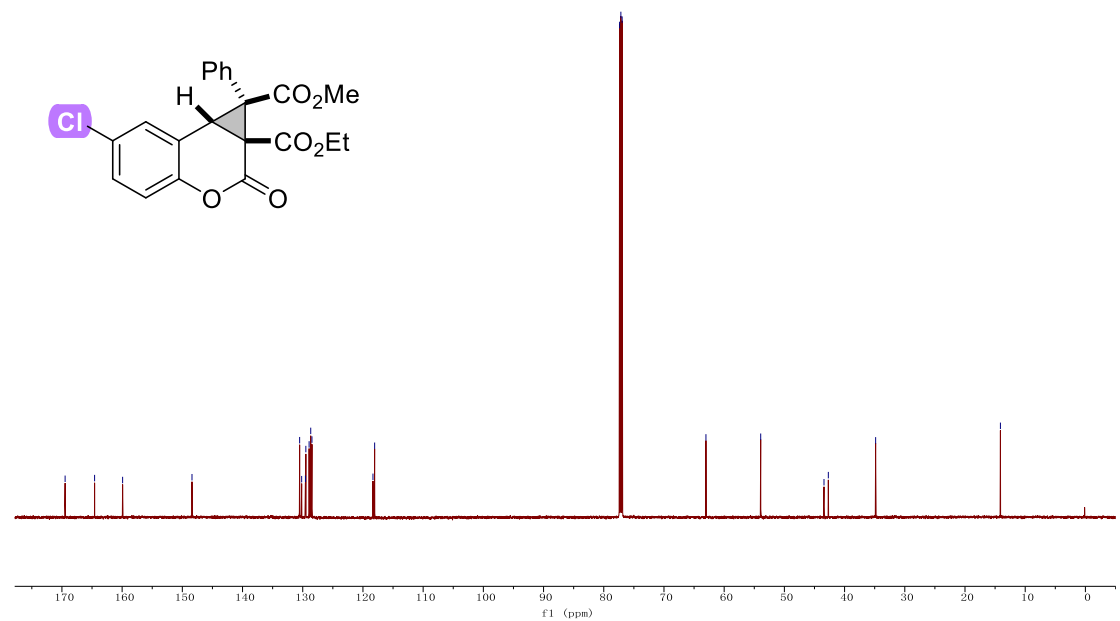

**1a-ethyl 1-methyl 7-methyl-2-oxo-1-phenyl-1,7b-dihydrocyclopropa[c]chromene-1,1a(2H)-dicarboxylate (3l)**

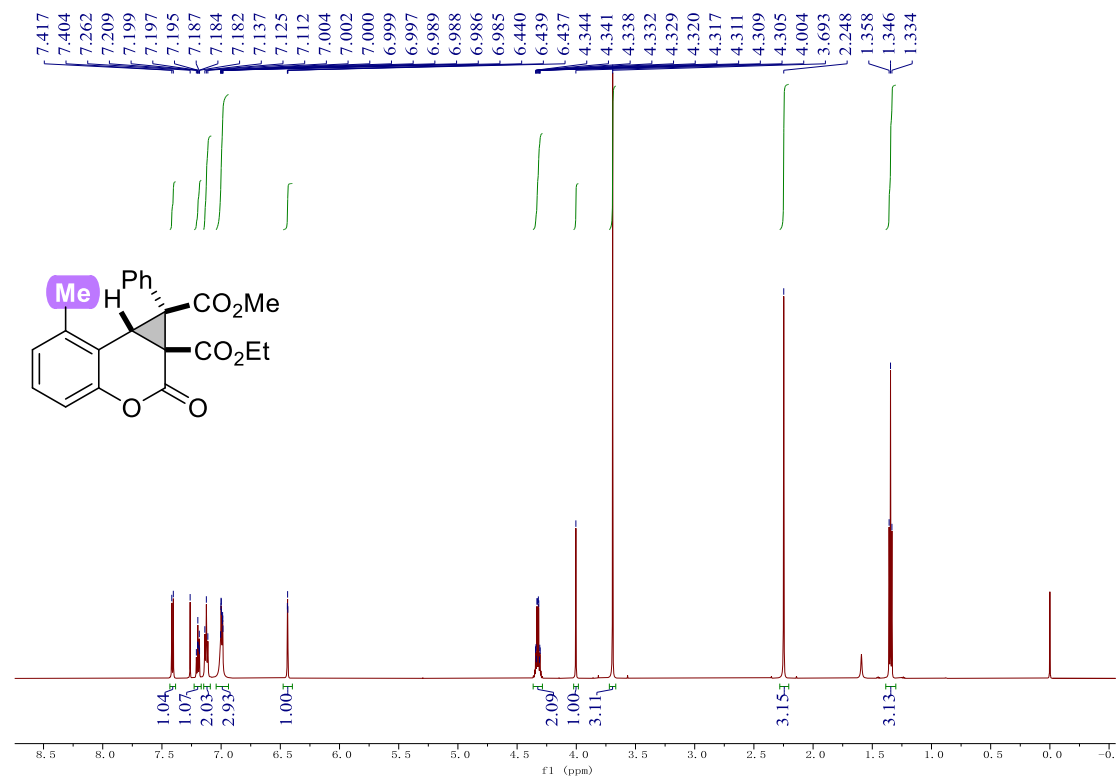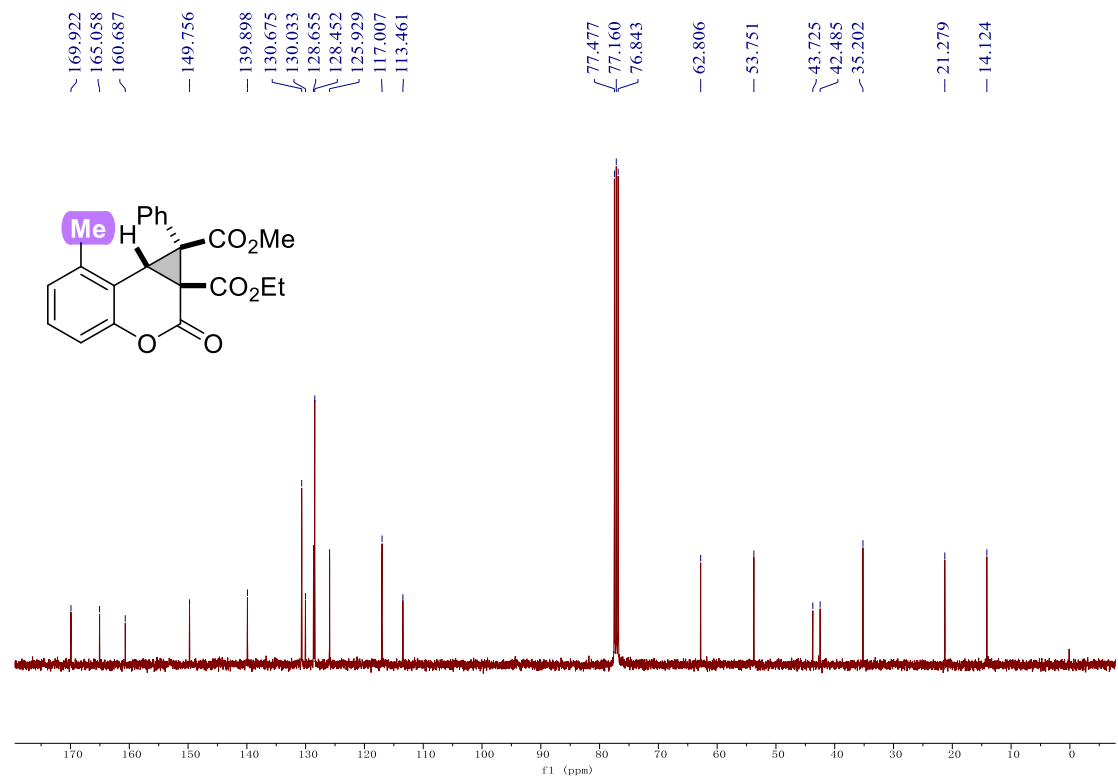

**1a-ethyl 1-methyl 2-oxo-1-phenyl-1,9c-dihydrobenzo[f]cyclopropa[c]chromene-1,1a(2H)-dicarboxylate (3m)**

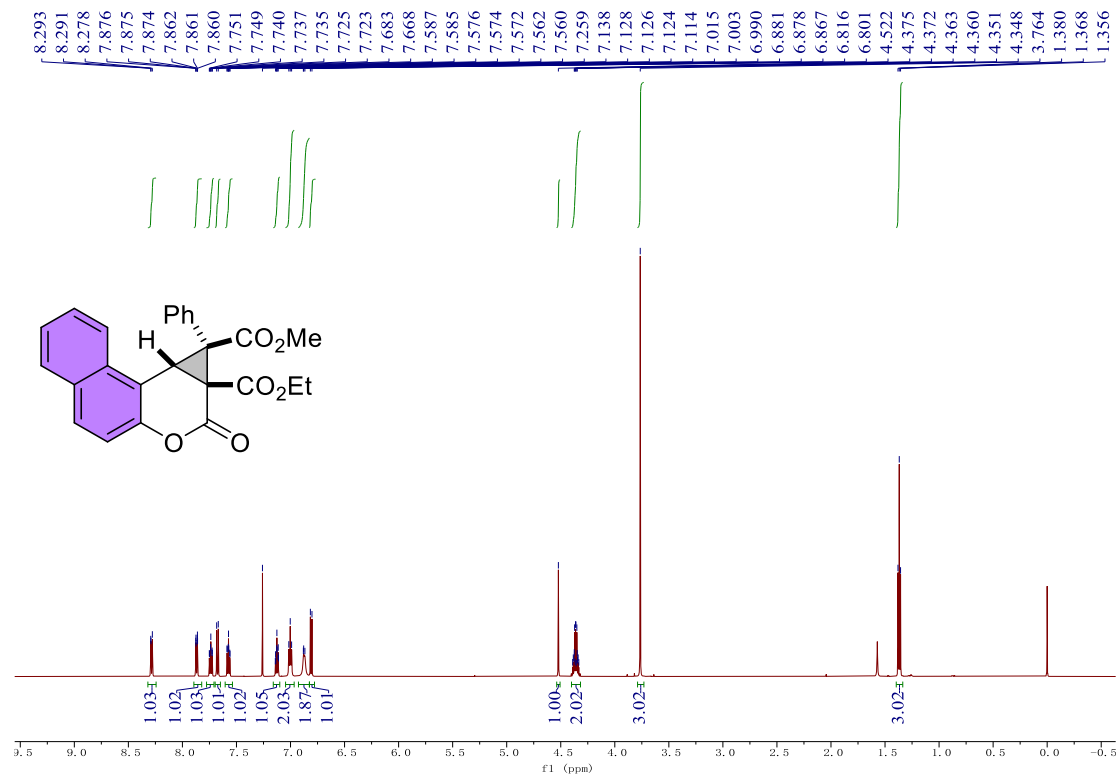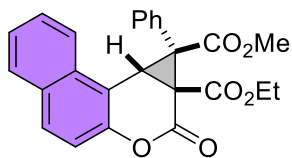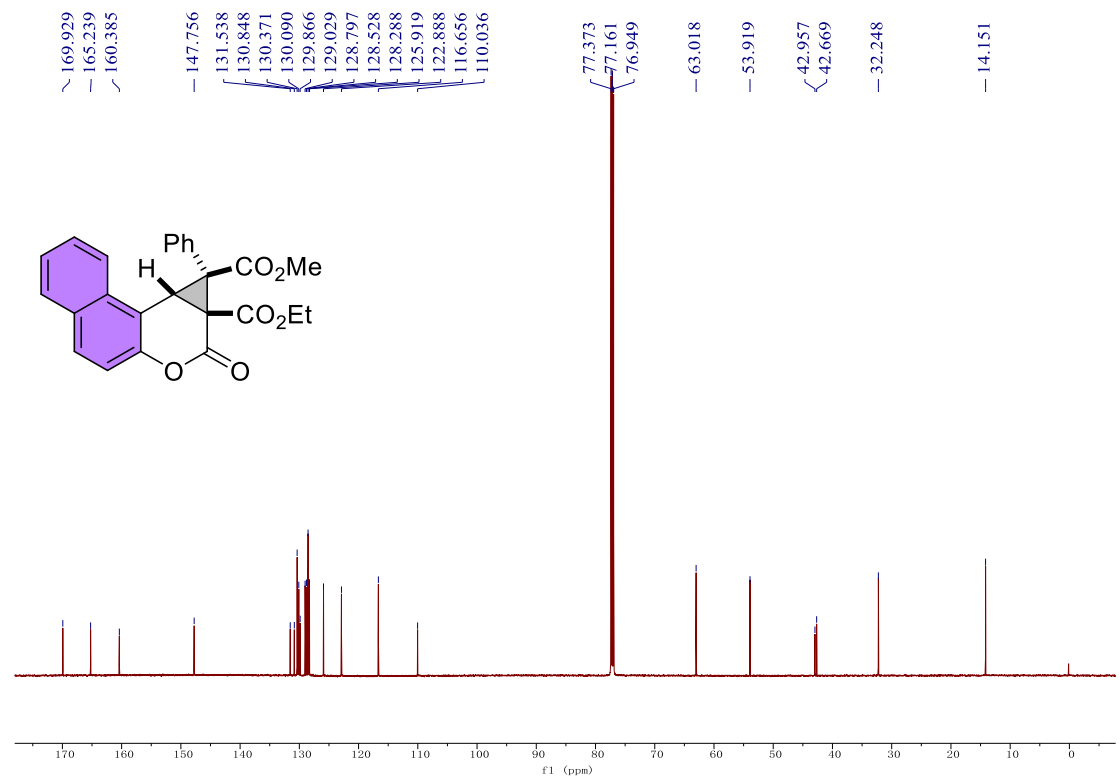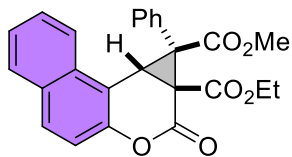

**diethyl 2-oxo-1-phenyl-1,7b-dihydrocyclopropa[c]chromene-1,1a(2H)-dicarboxylate (3n)**

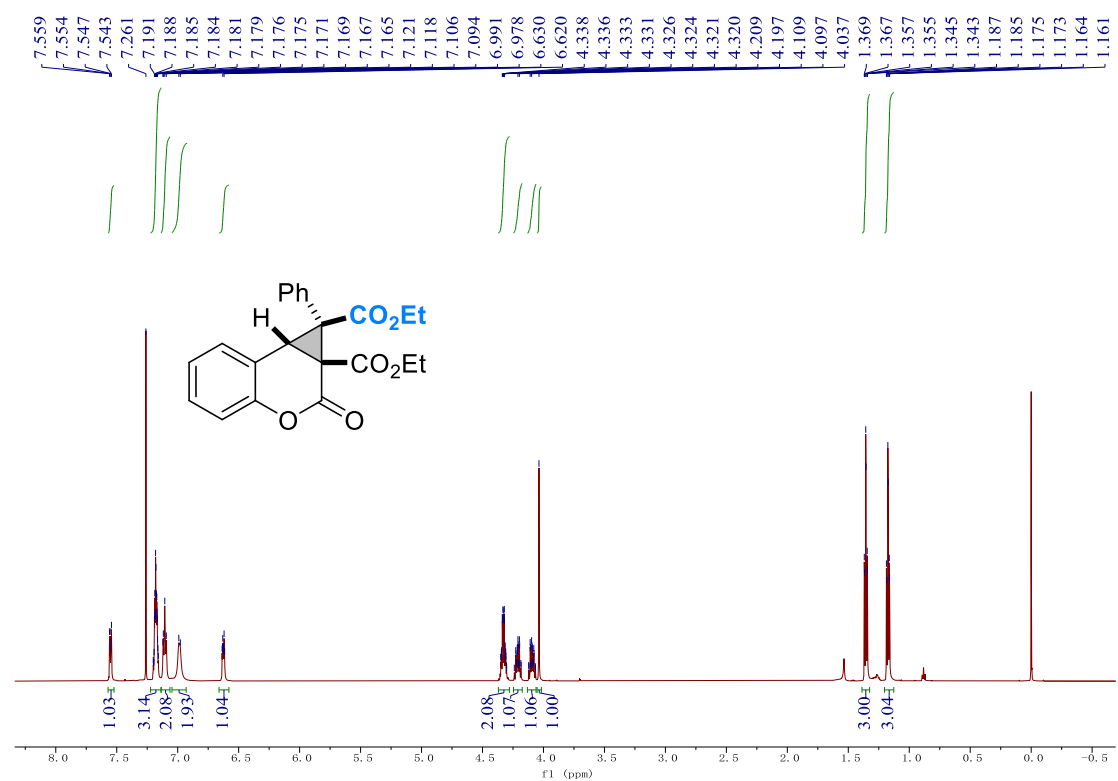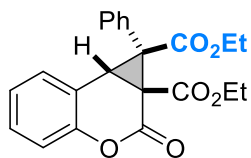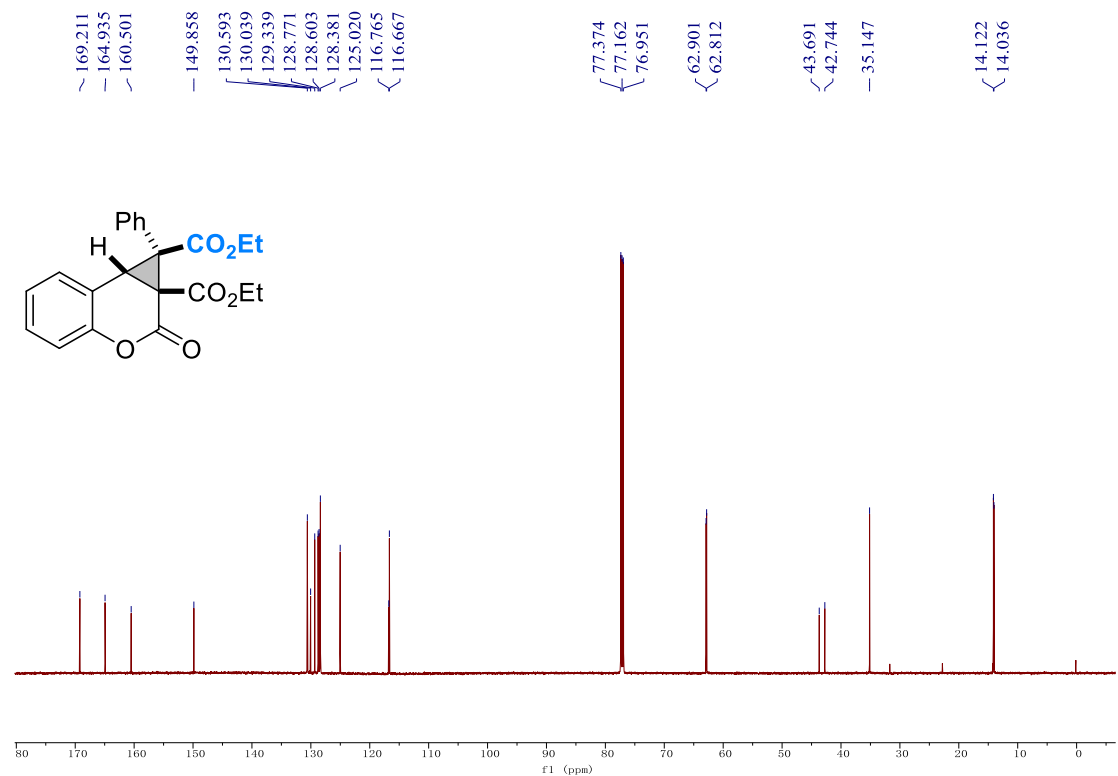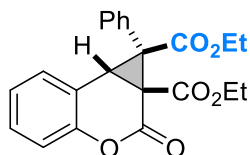

**diethyl 2-oxo-1-(p-tolyl)-1,7b-dihydrocyclopropa[c]chromene-1,1a(2H)-dicarboxylate (3o)**

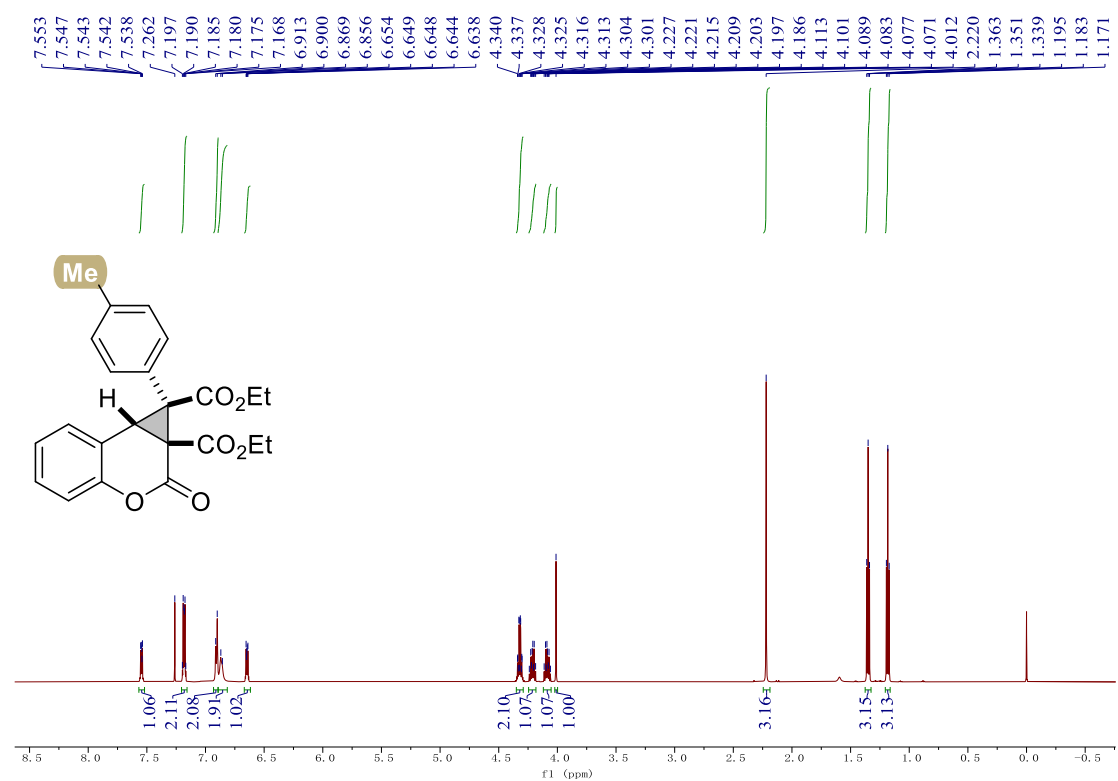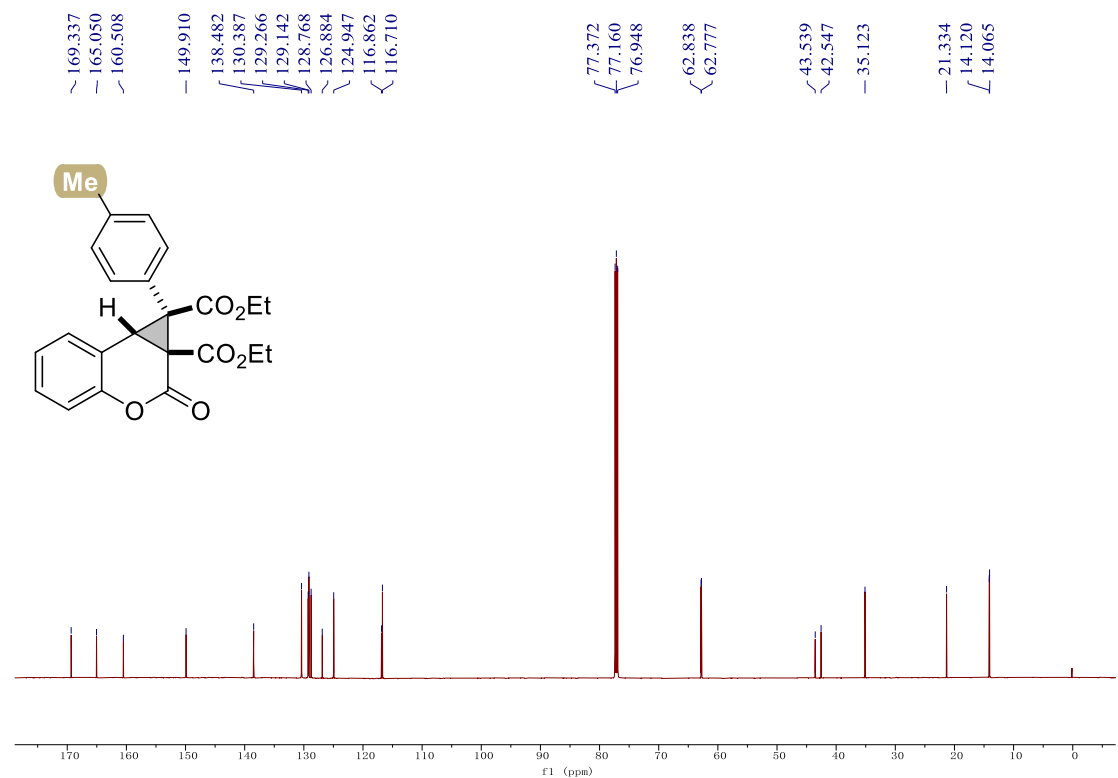

**diethyl 1-(4-(tert-butyl)phenyl)-2-oxo-1,7b-dihydrocyclopropa[c]chromene-1,1a(2H)-dicarboxylate (3p)**

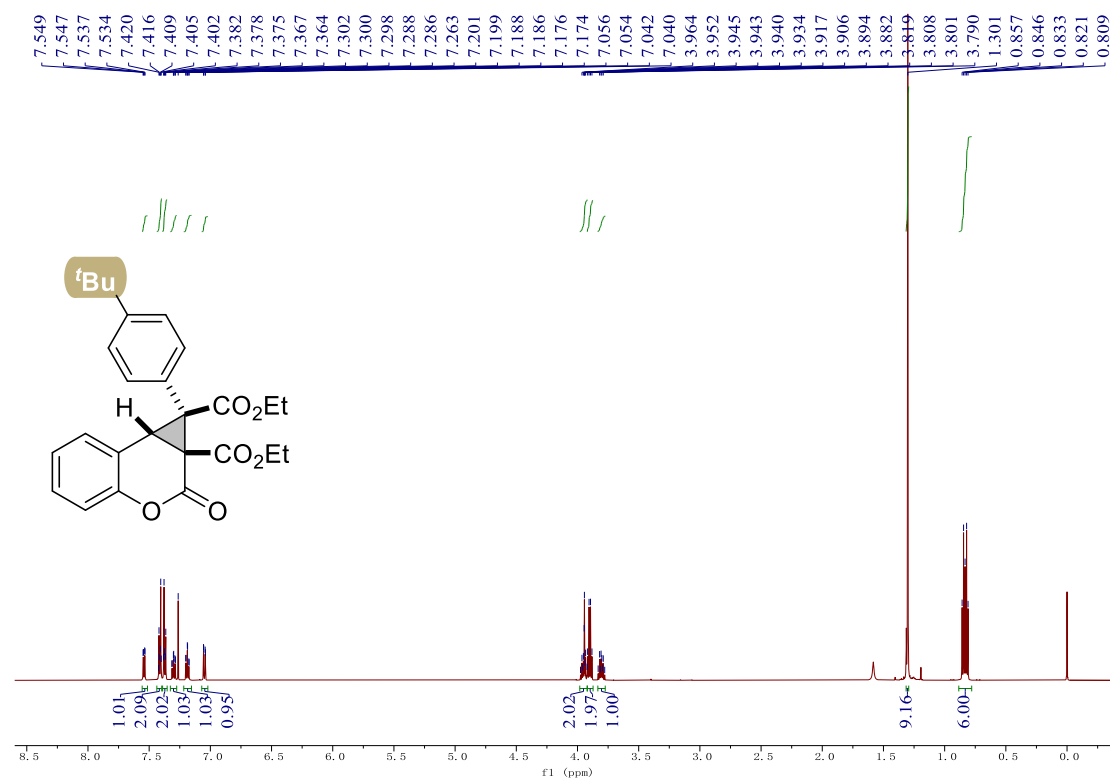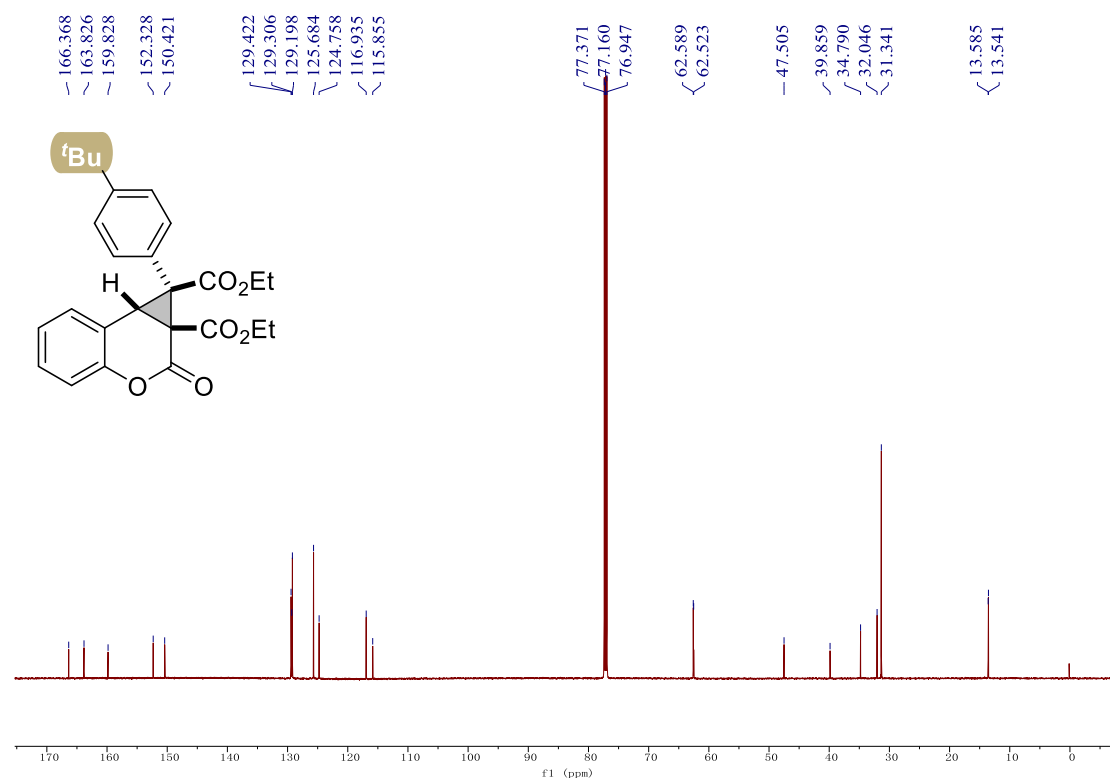

diethyl 1-(4-methoxyphenyl)-2-oxo-1,7b-dihydrocyclopropa[c]chromene-1,1a(2H)-dicarboxylate (3q)

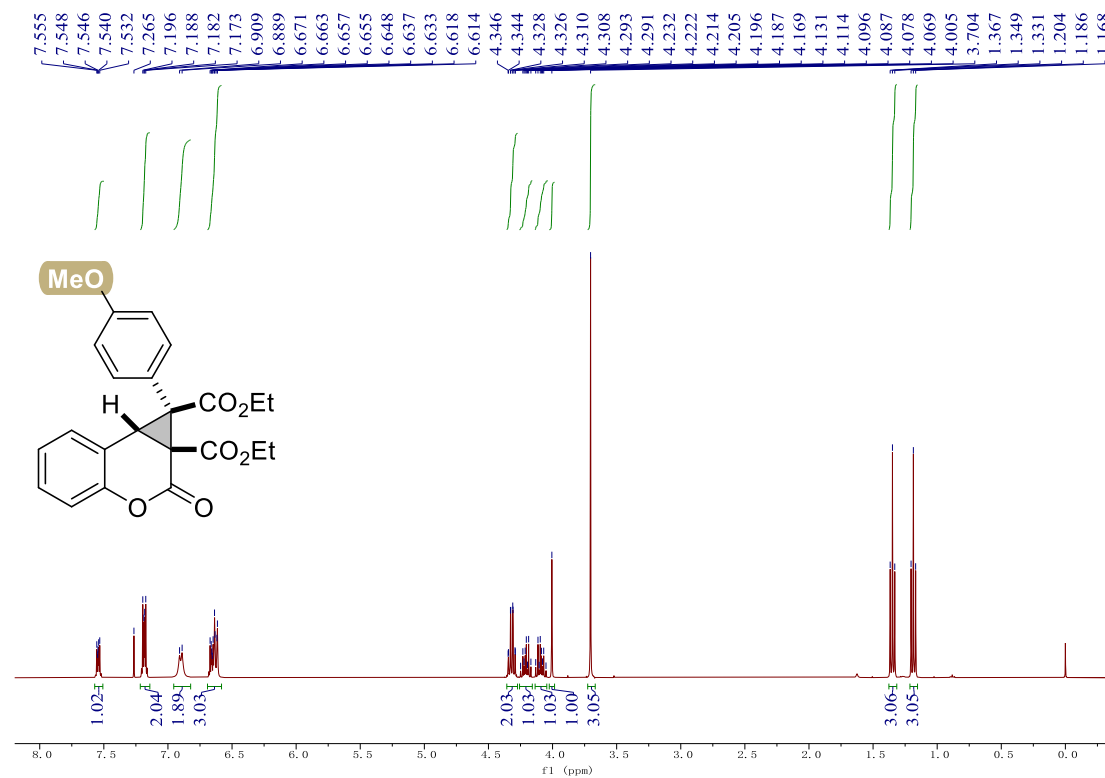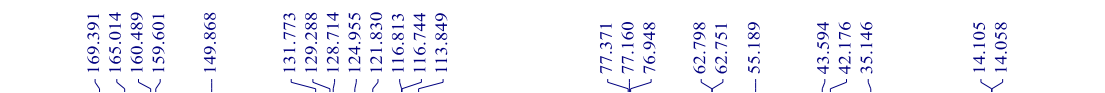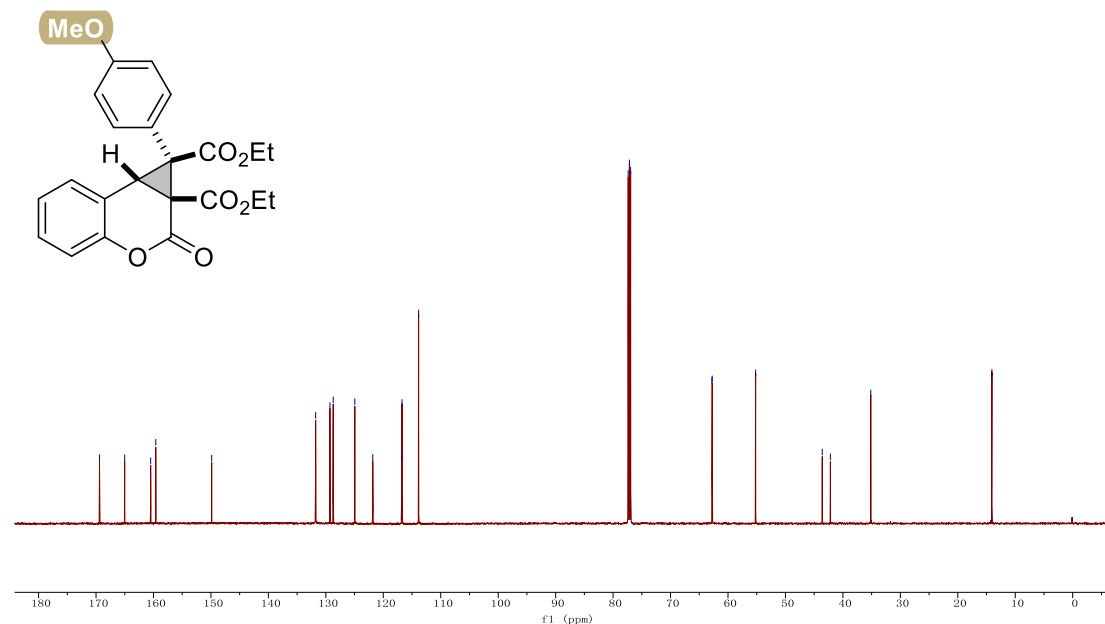

**diethyl 1-(4-chlorophenyl)-2-oxo-1,7b-dihydrocyclopropa[c]chromene-1,1a(2H)-dicarboxylate (3r)**

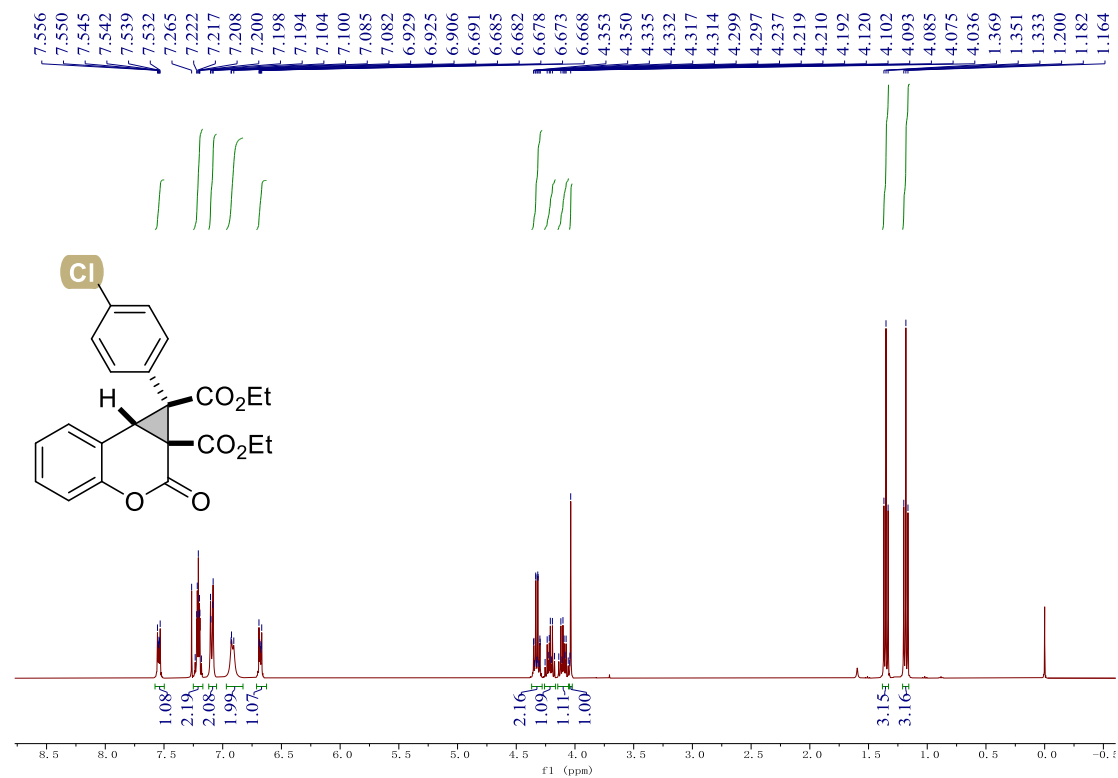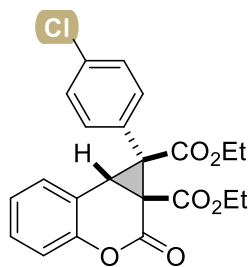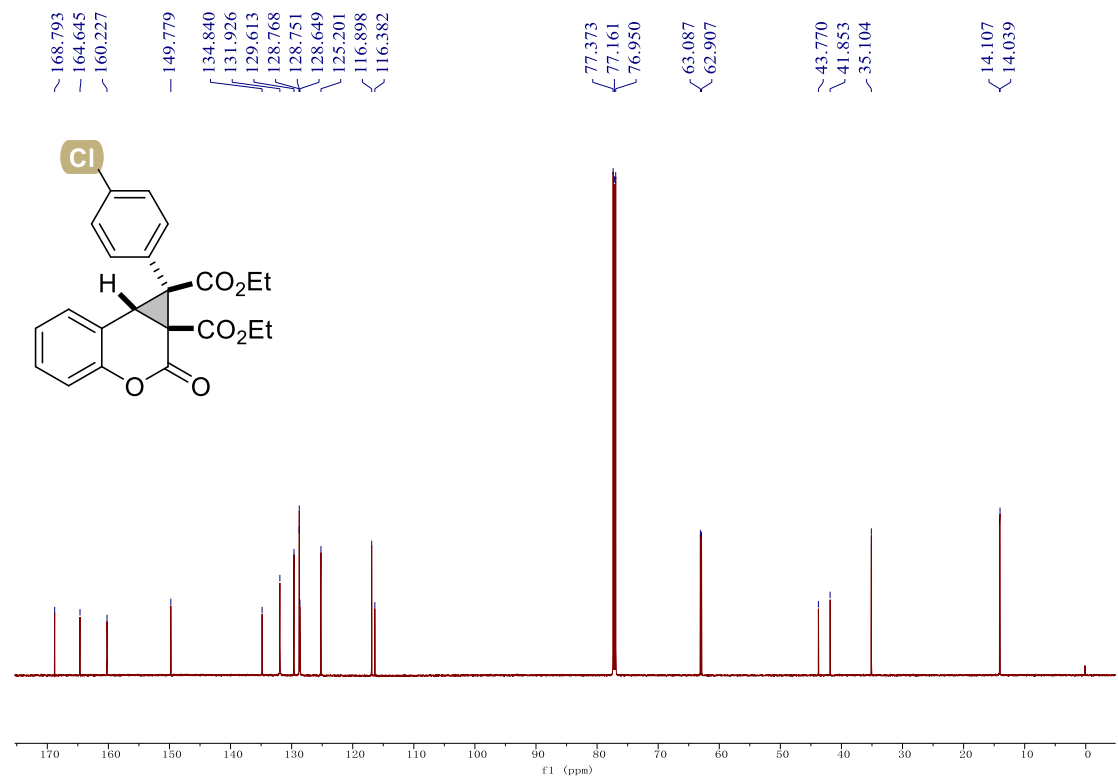

diethyl 1-(4-bromophenyl)-2-oxo-1,7b-dihydrocyclopropa[c]chromene-1,1a(2H)-dicarboxylate (3s)

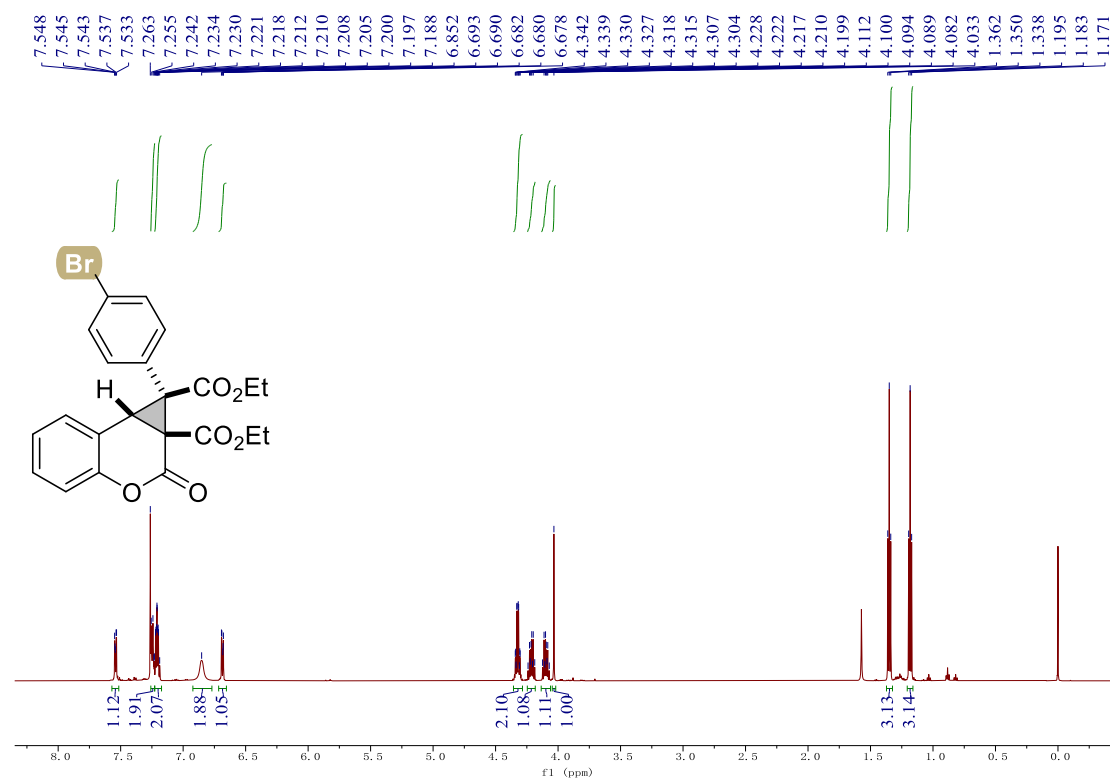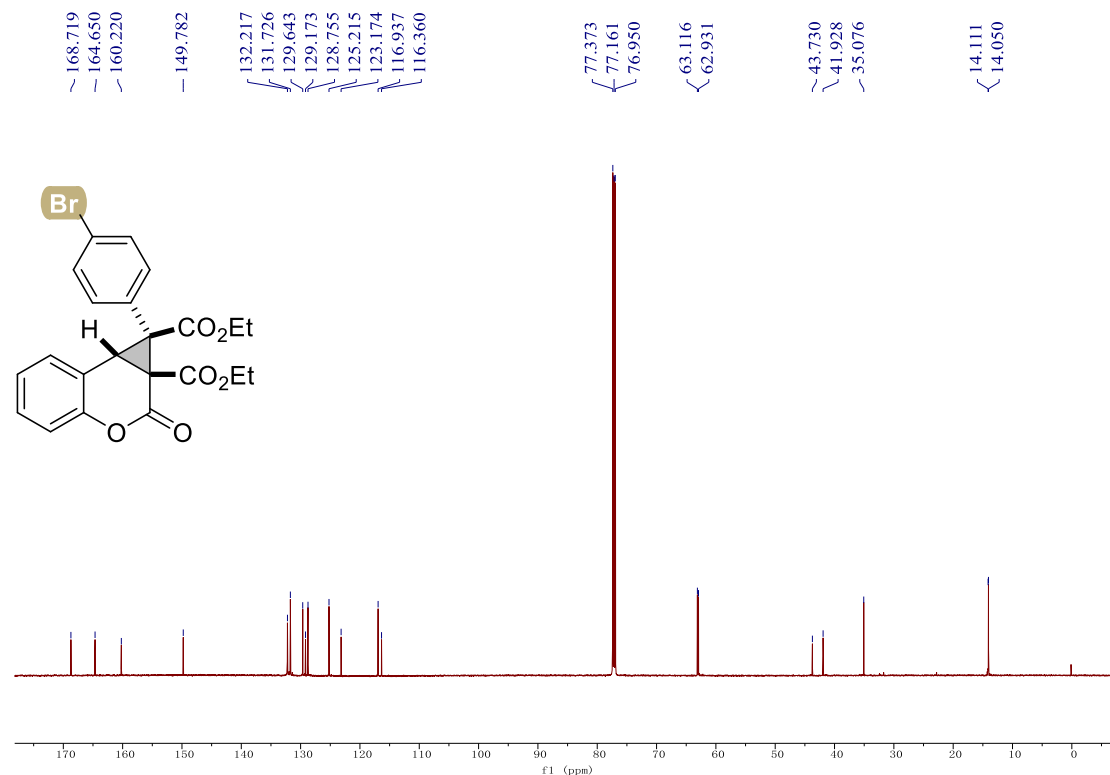

diethyl 1-(3,4-dichlorophenyl)-2-oxo-1,7b-dihydrocyclopropa[c]chromene-1,1a(2H)-dicarboxylate (3t)

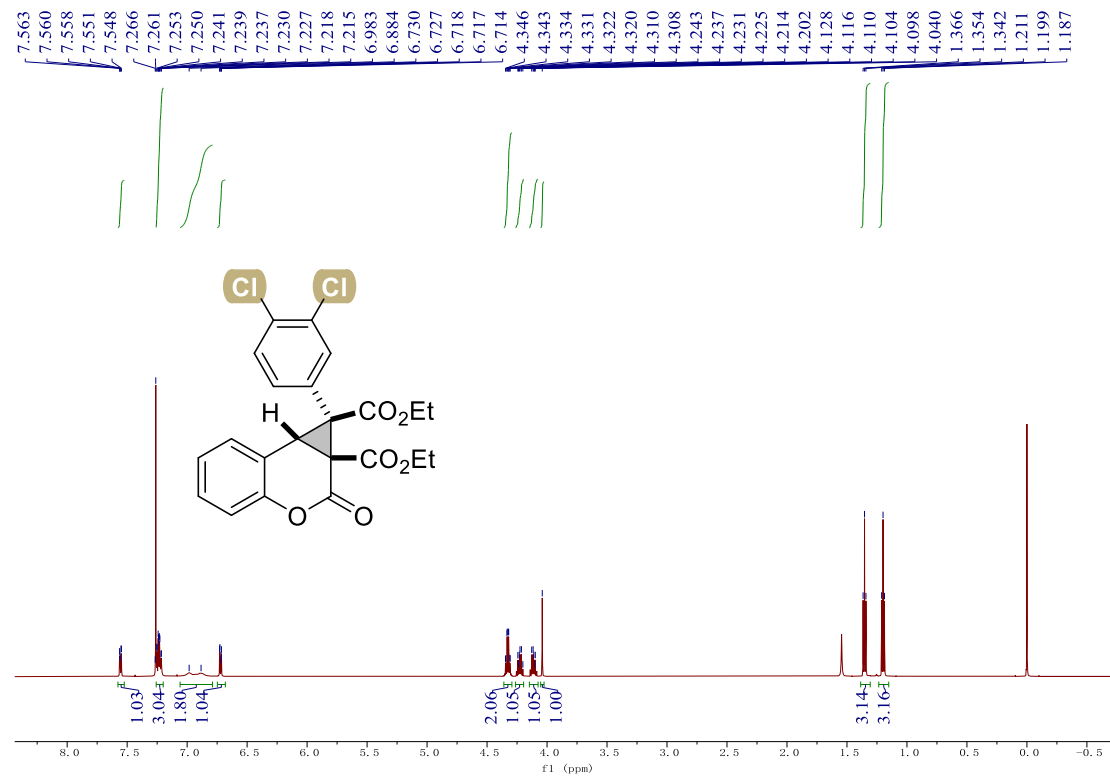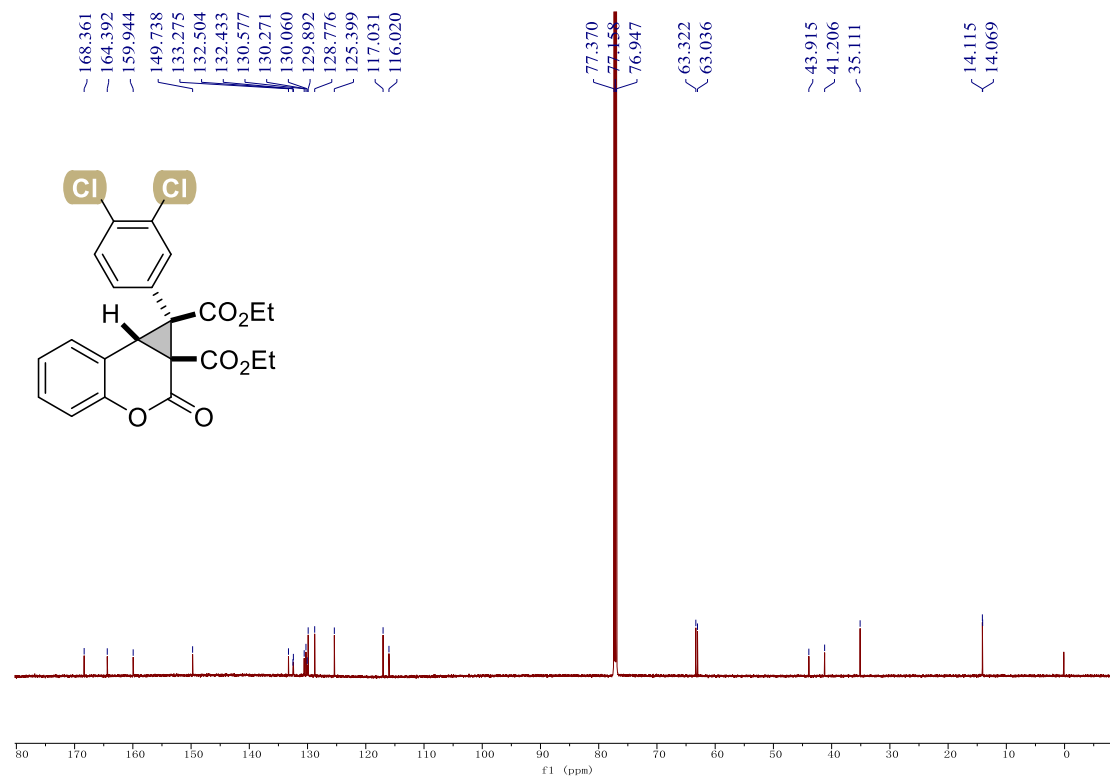

triethyl 2-oxocyclopropa[*c*]chromene-1,1,1a(2*H*,7*bH*)-tricarboxylate (3u)

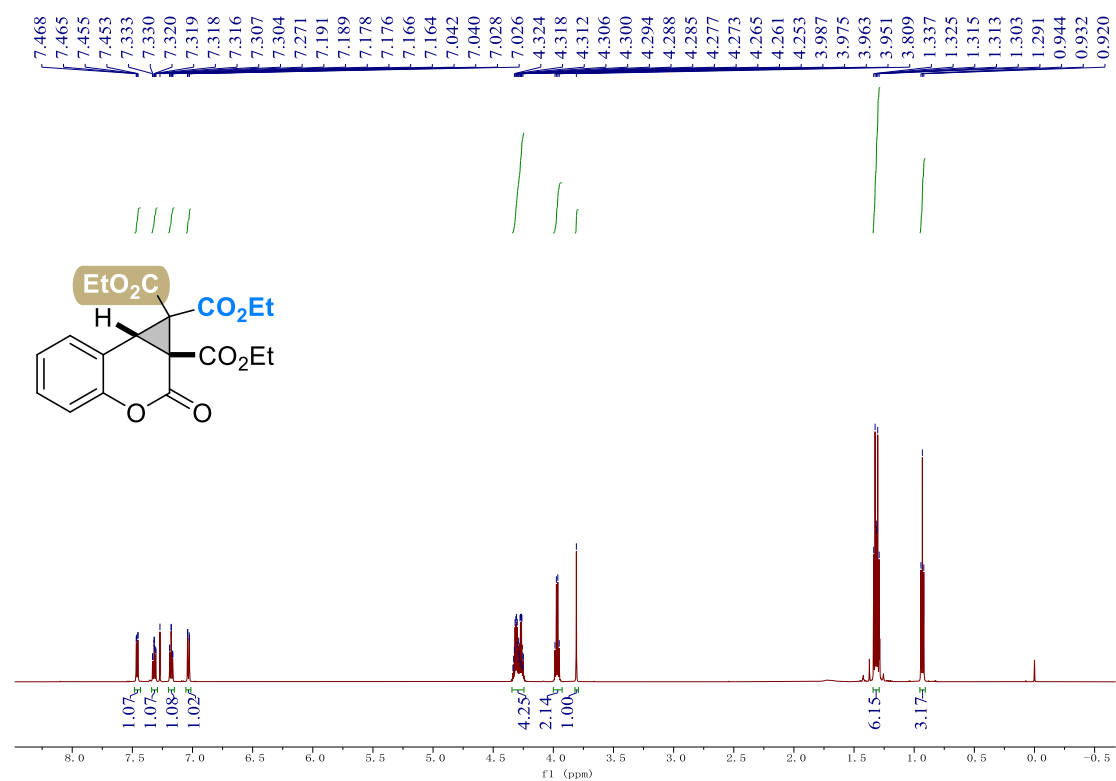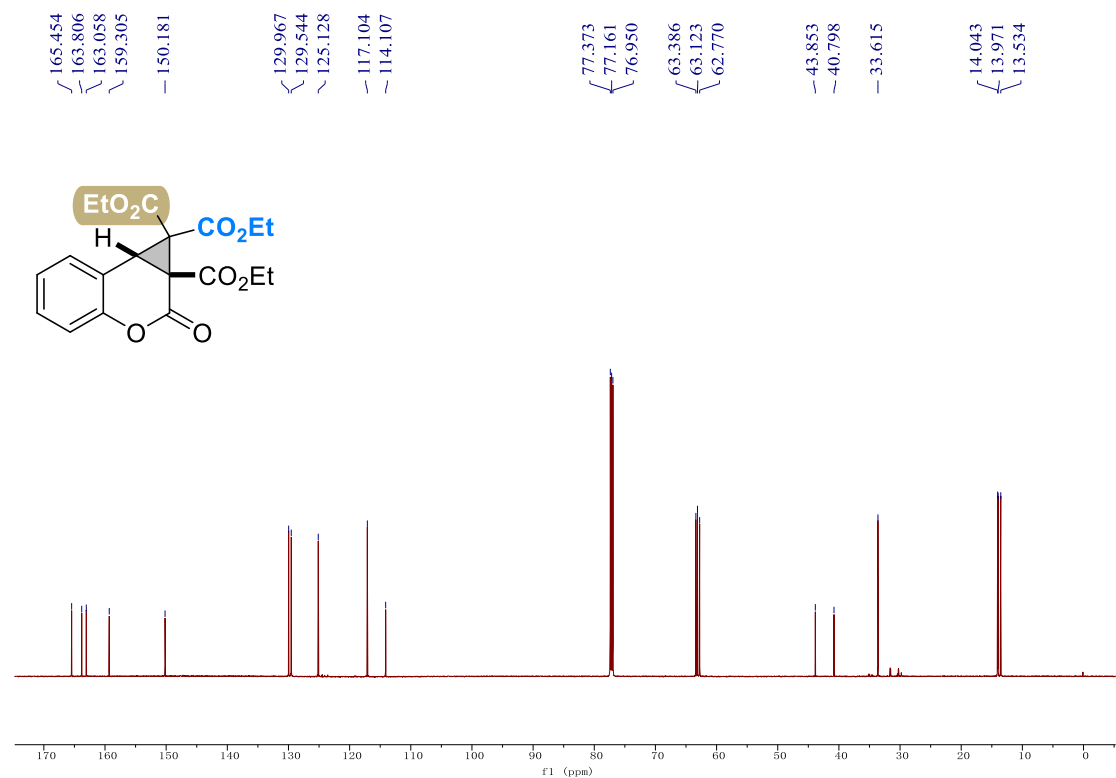

**1-(cyclopropylmethyl) 1a-ethyl 2-oxo-1-phenyl-1,7b-dihydrocycloproa[c]chromene-1,1a(2H)-dicarboxylate (3v)**

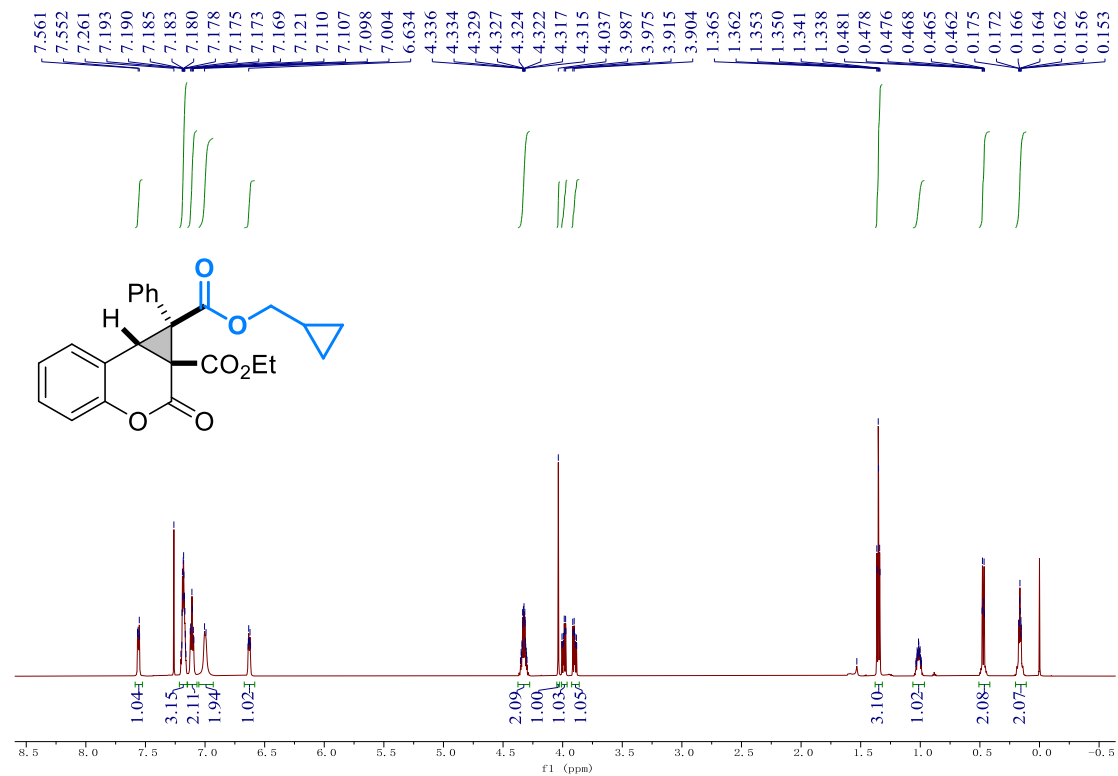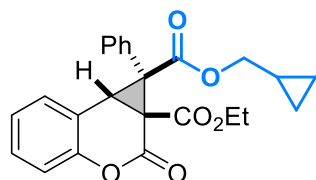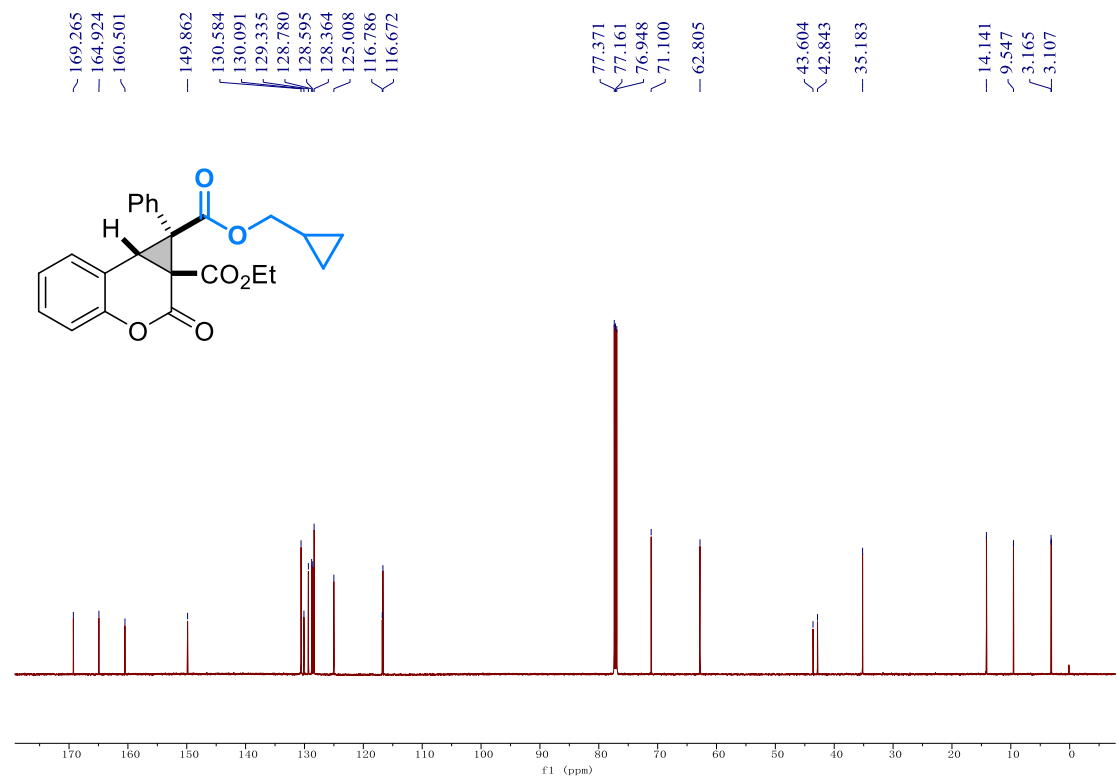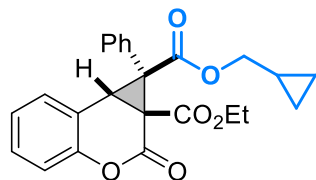

**1a-ethyl 1-(naphthalen-2-ylmethyl) 2-oxo-1-phenyl-1,7b-dihydrocyclopropa[c]chromene-1,1a(2H)-dicarboxylate (3w)**

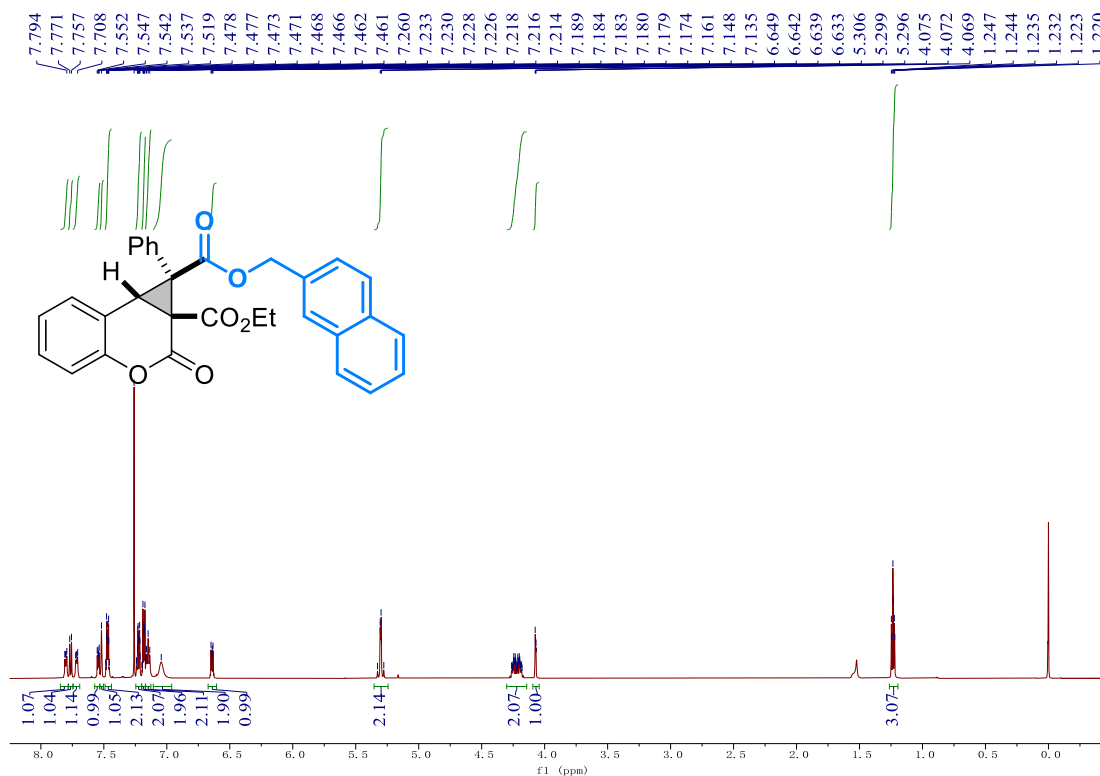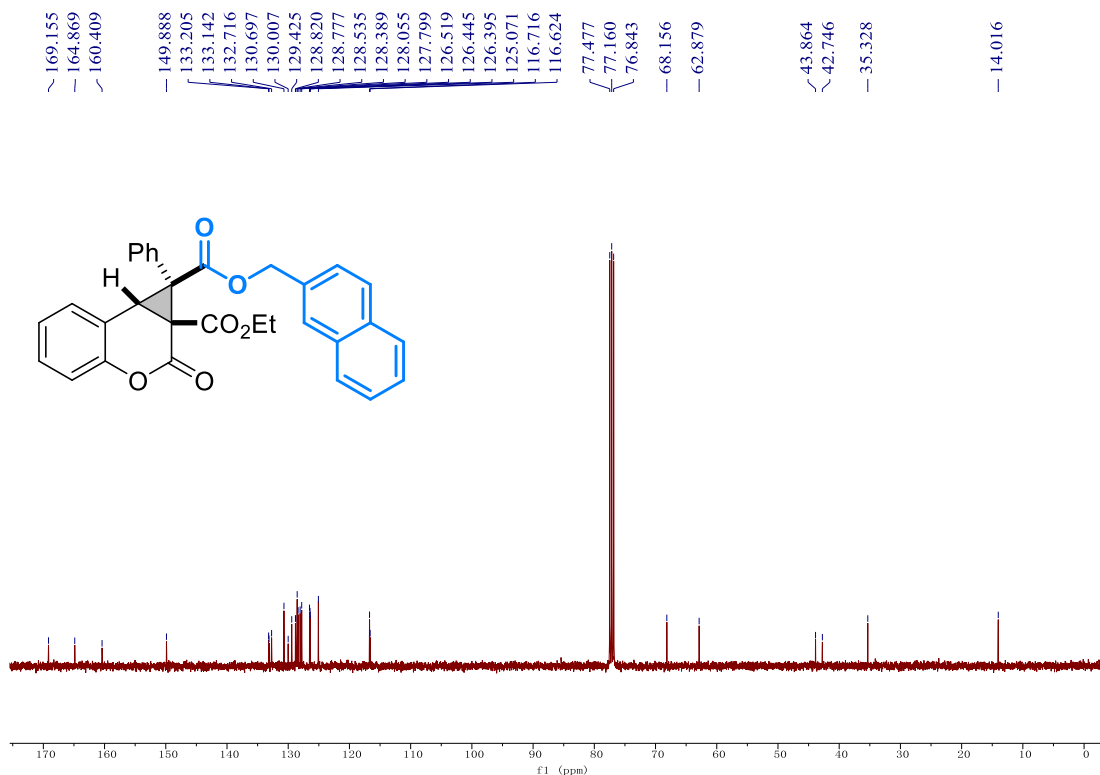

ethyl 1-acetyl-1-methyl-2-oxo-1,7b-dihydrocyclopropa[c]chromene-1a(2H)-carboxylate (3x)

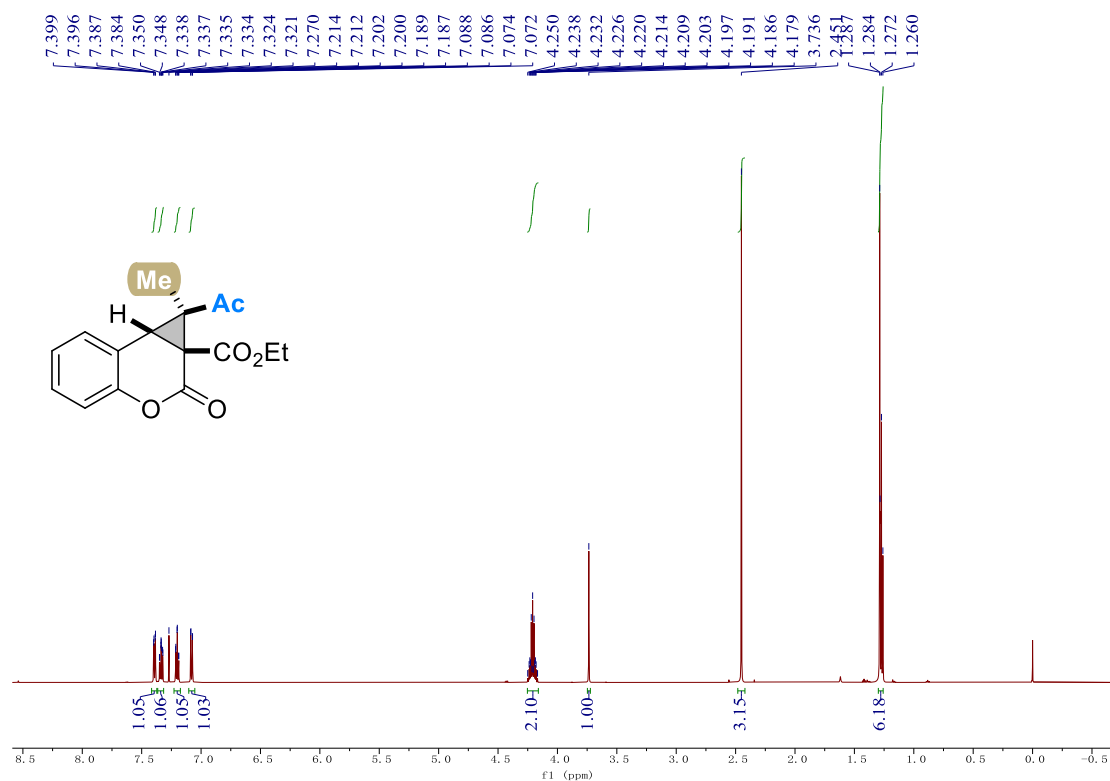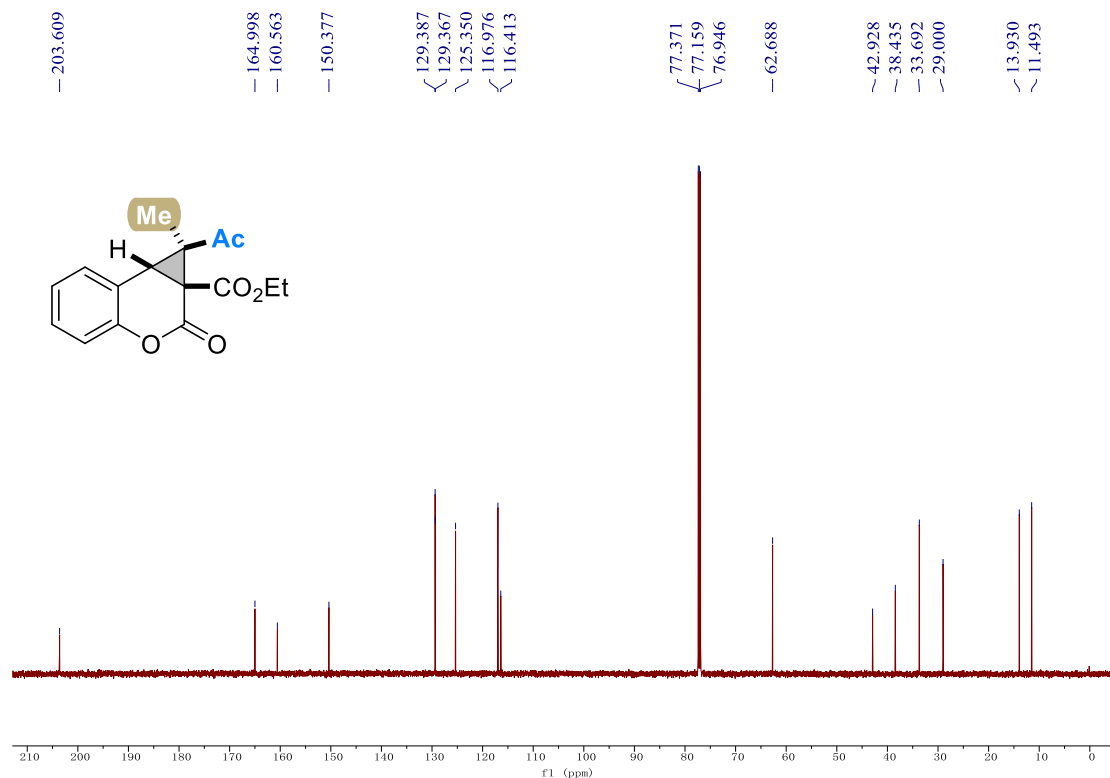

ethyl 1'-methyl-2,2'-dioxo-2H-spiro[cyclopropa[*c*]chromene-1,3'-indoline]-1a(7*bH*)-carboxylate (5a)

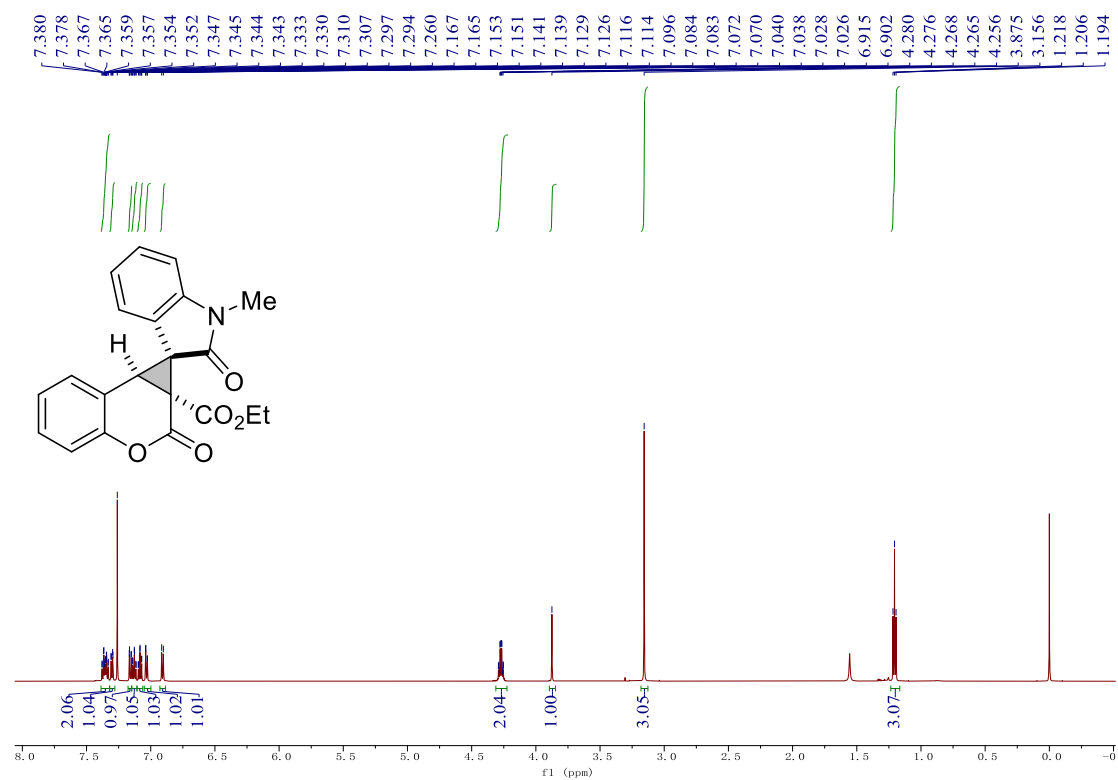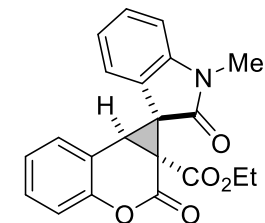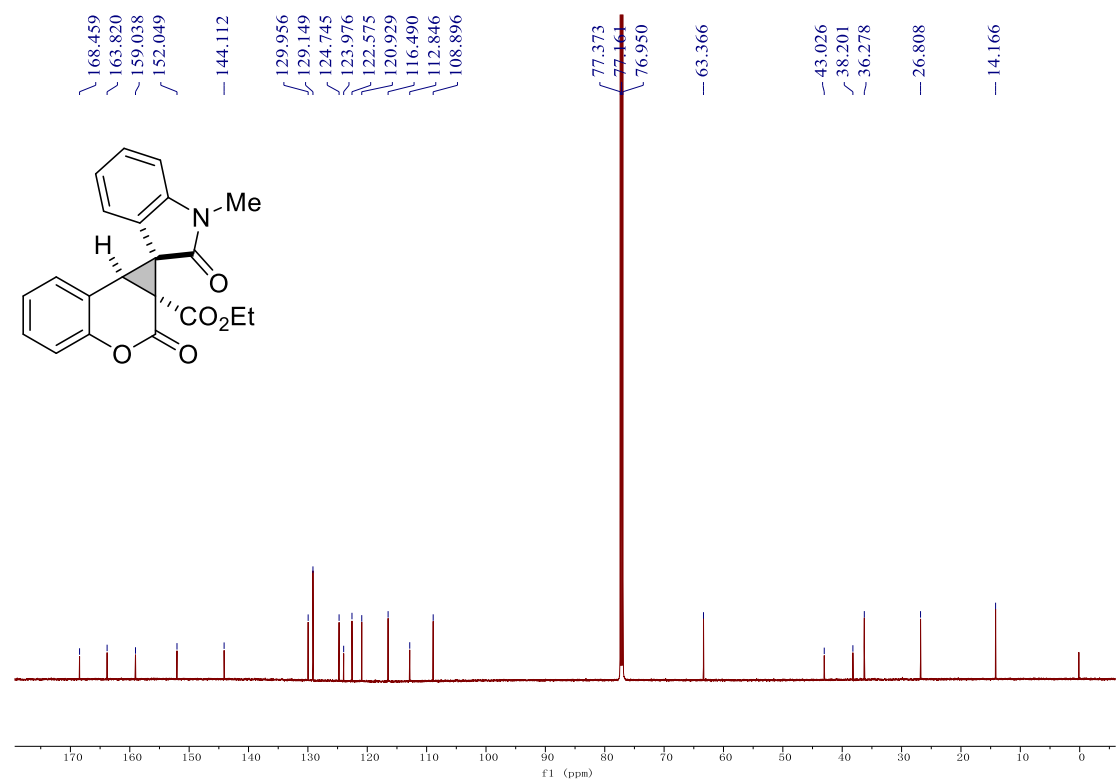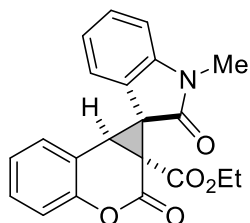

ethyl 1',4-dimethyl-2,2'-dioxo-2H-spiro[cyclopropa[c]chromene-1,3'-indoline]-1a(7bH)-carboxylate (5b)

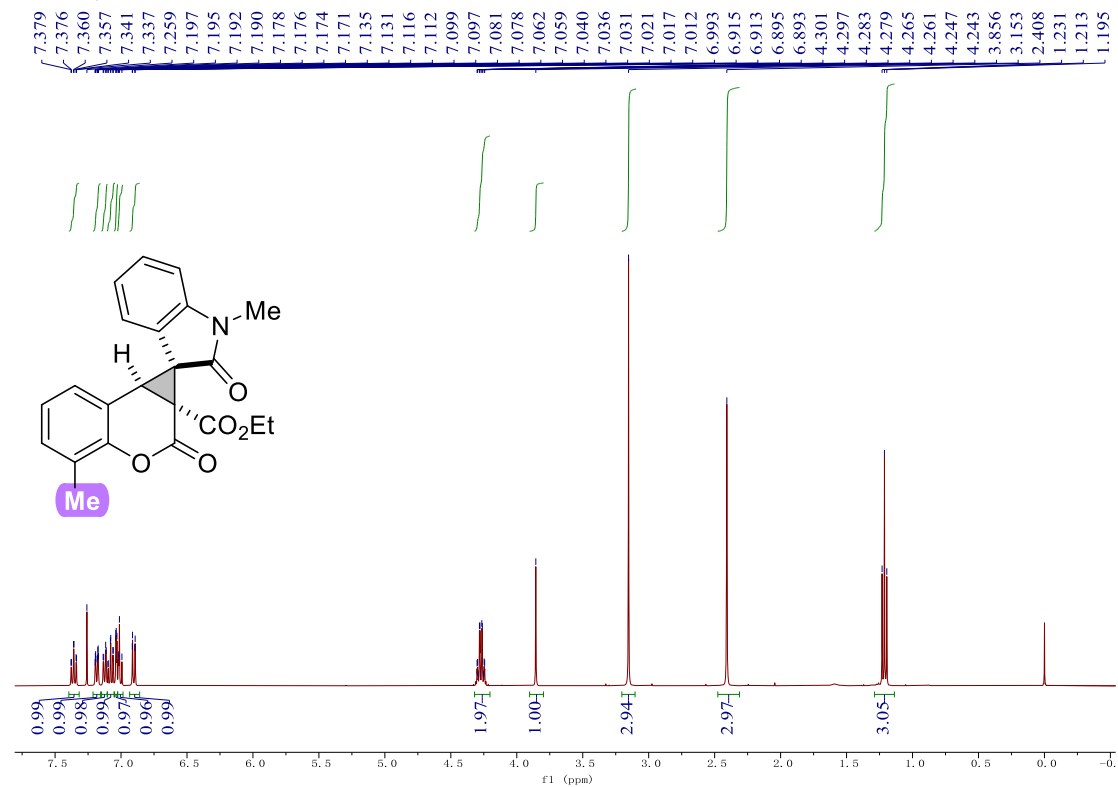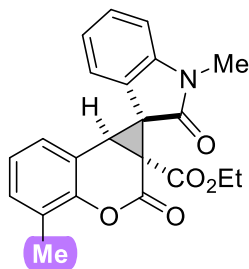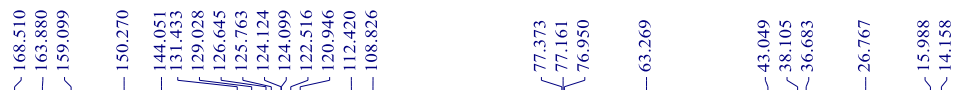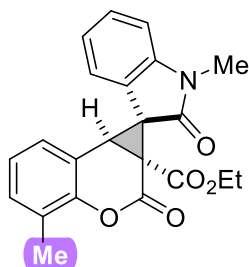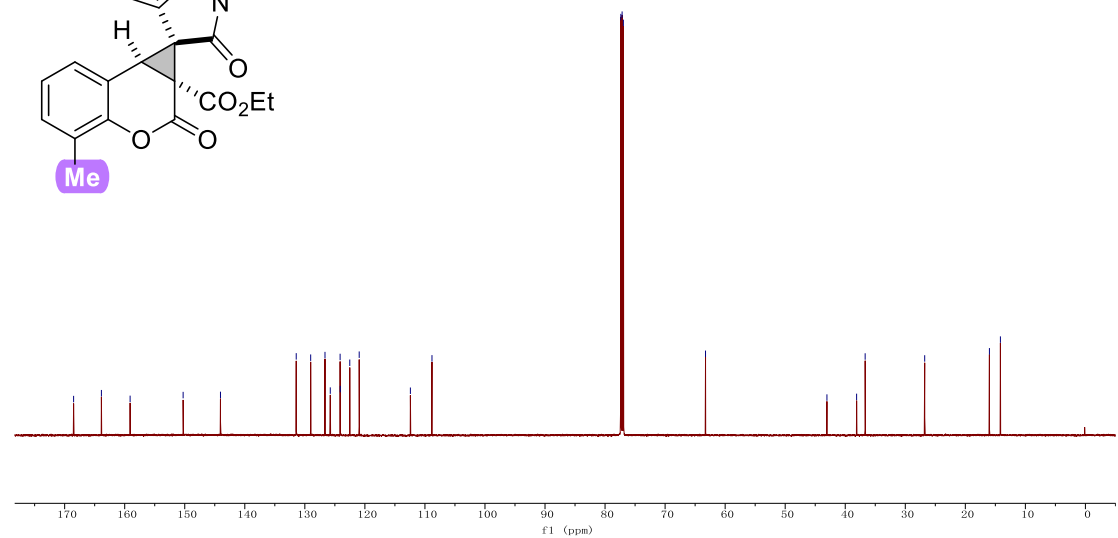

ethyl 1',5-dimethyl-2,2'-dioxo-2H-spiro[cyclopropa[c]chromene-1,3'-indoline]-1a(7bH)-carboxylate (5c)

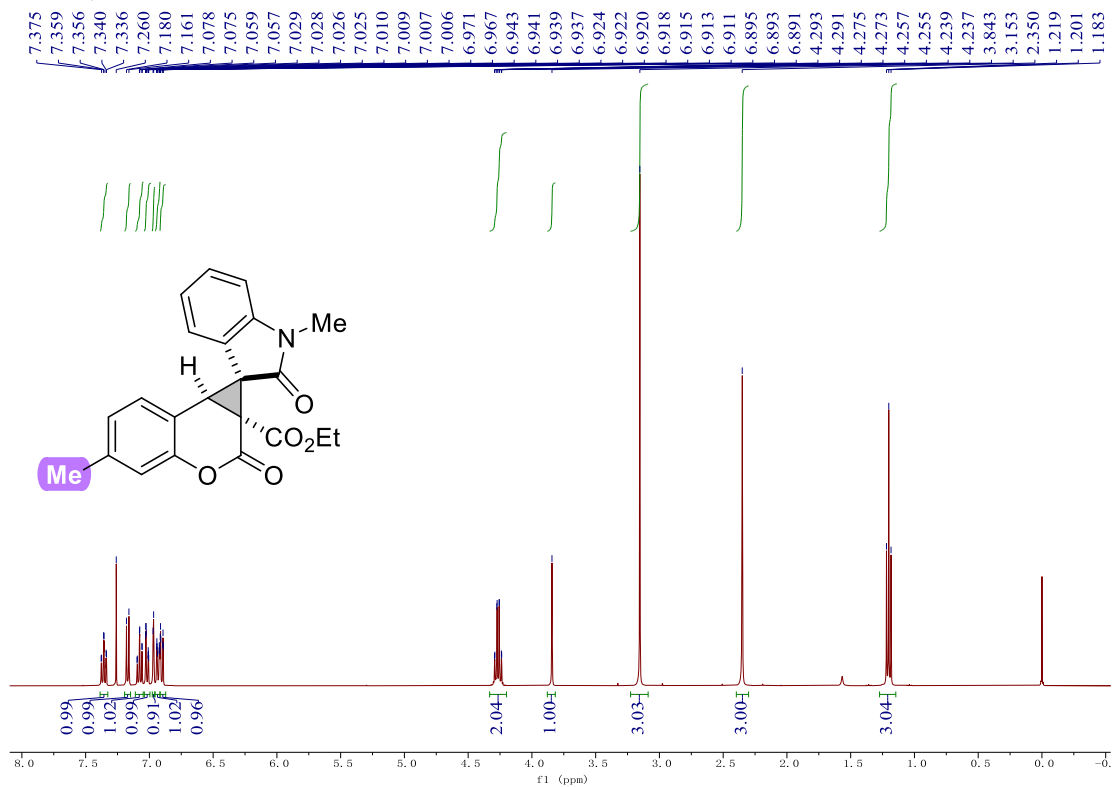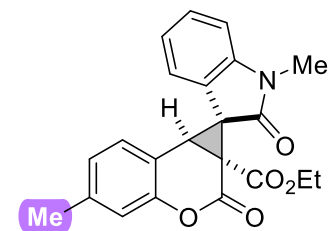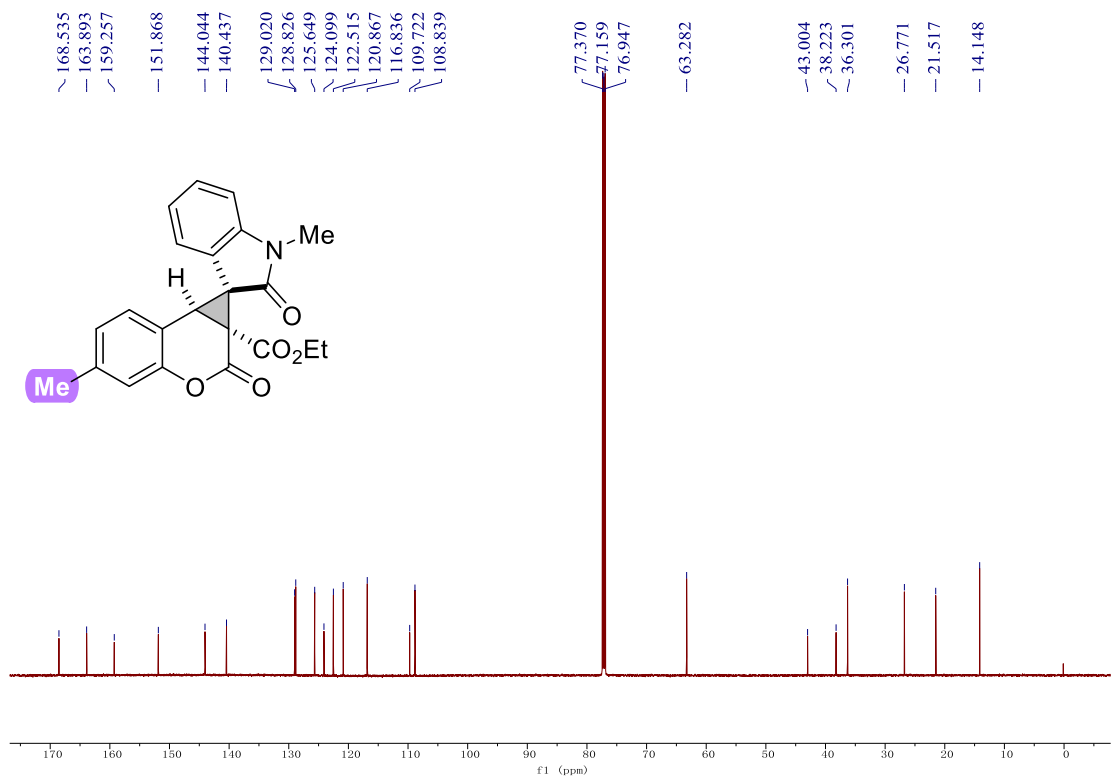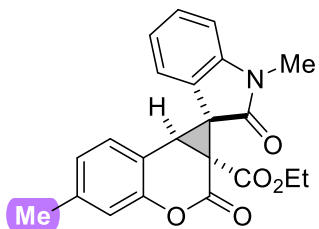

**ethyl 5-bromo-1'-methyl-2,2'-dioxo-2H-spiro[cyclopropa[c]chromene-1,3'-indoline]-1a(7bH)-carboxylate (5d)**

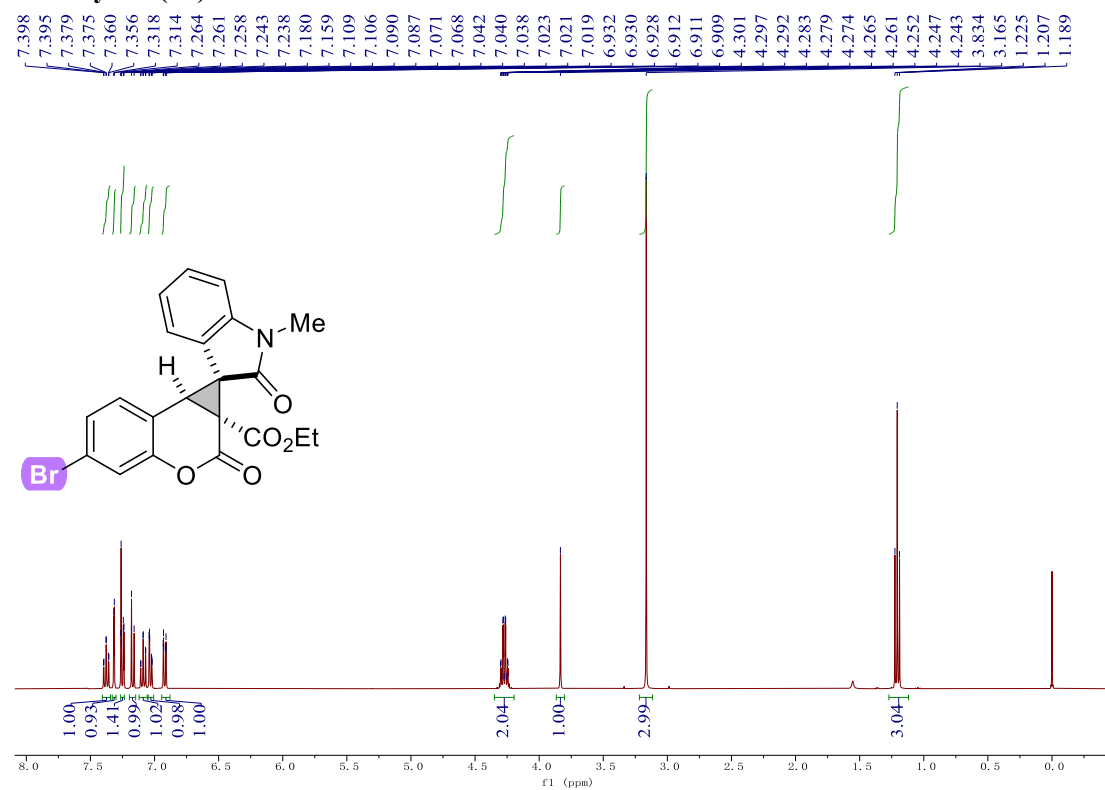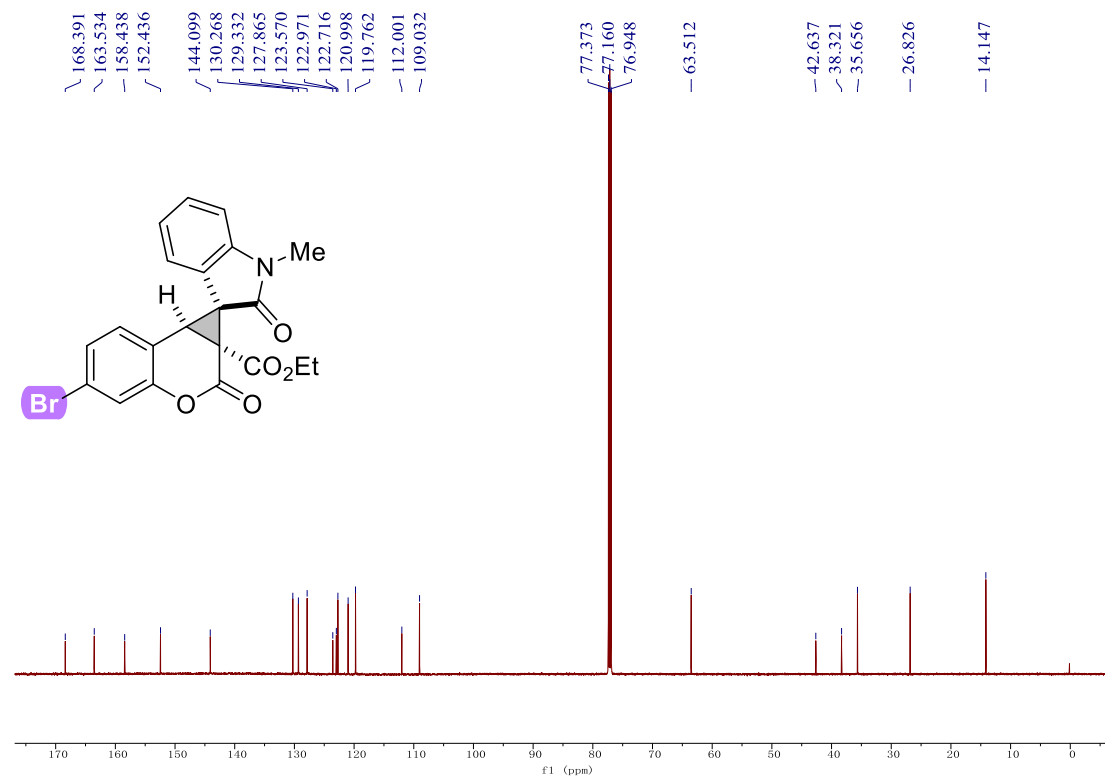

ethyl 1',7-dimethyl-2,2'-dioxo-2H-spiro[cyclopropa[c]chromene-1,3'-indoline]-1a(7bH)-carboxylate (5e)

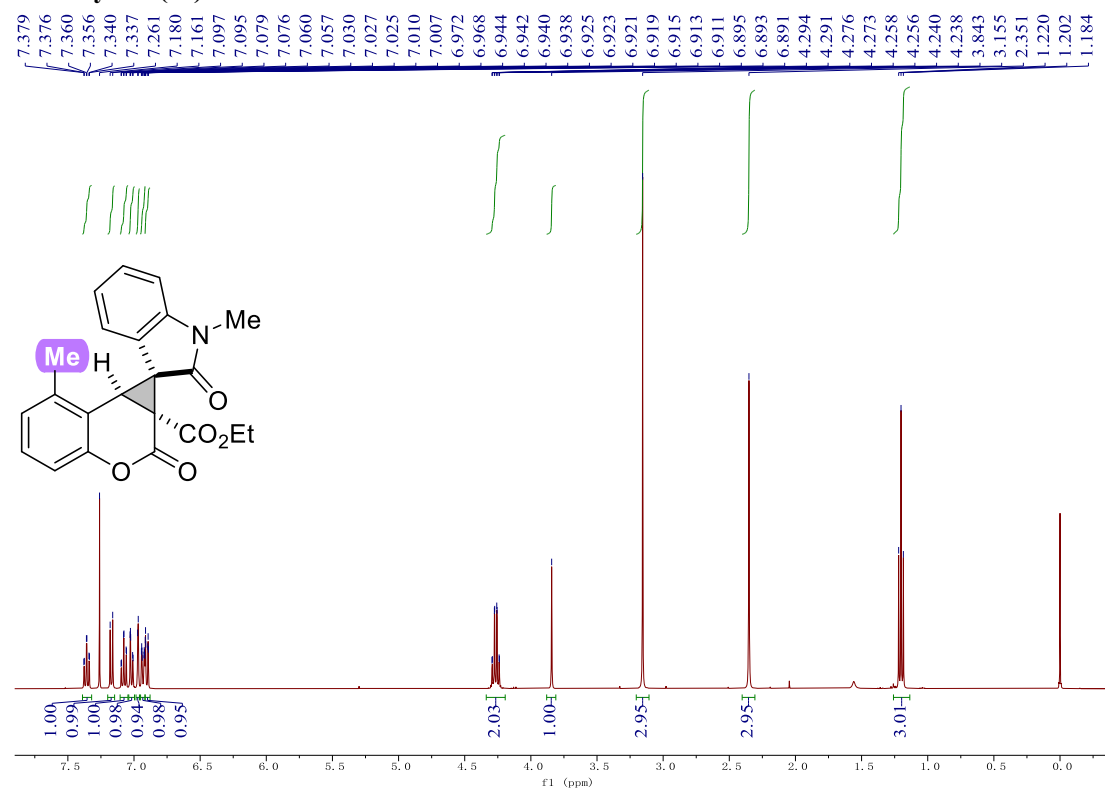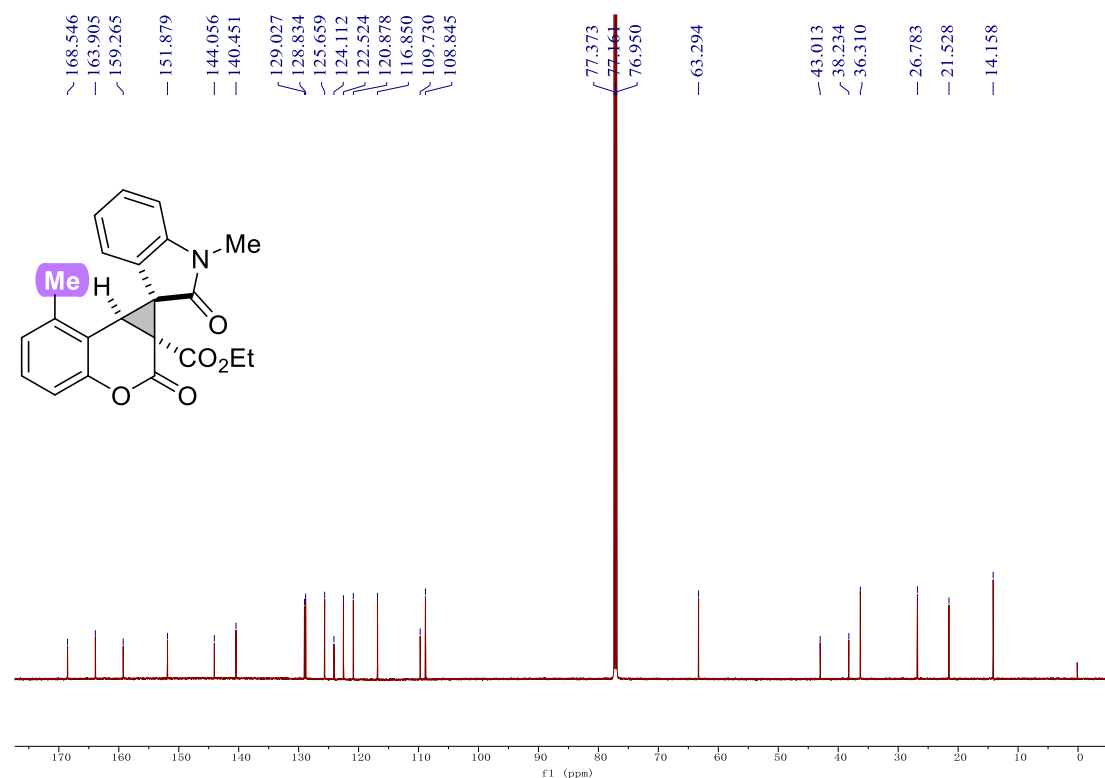

1a-acetyl-1'-methyl-1a,7b-dihydro-2H-spiro[cyclopropa[c]chromene-1,3'-indoline]-2,2'-dione

(5f)

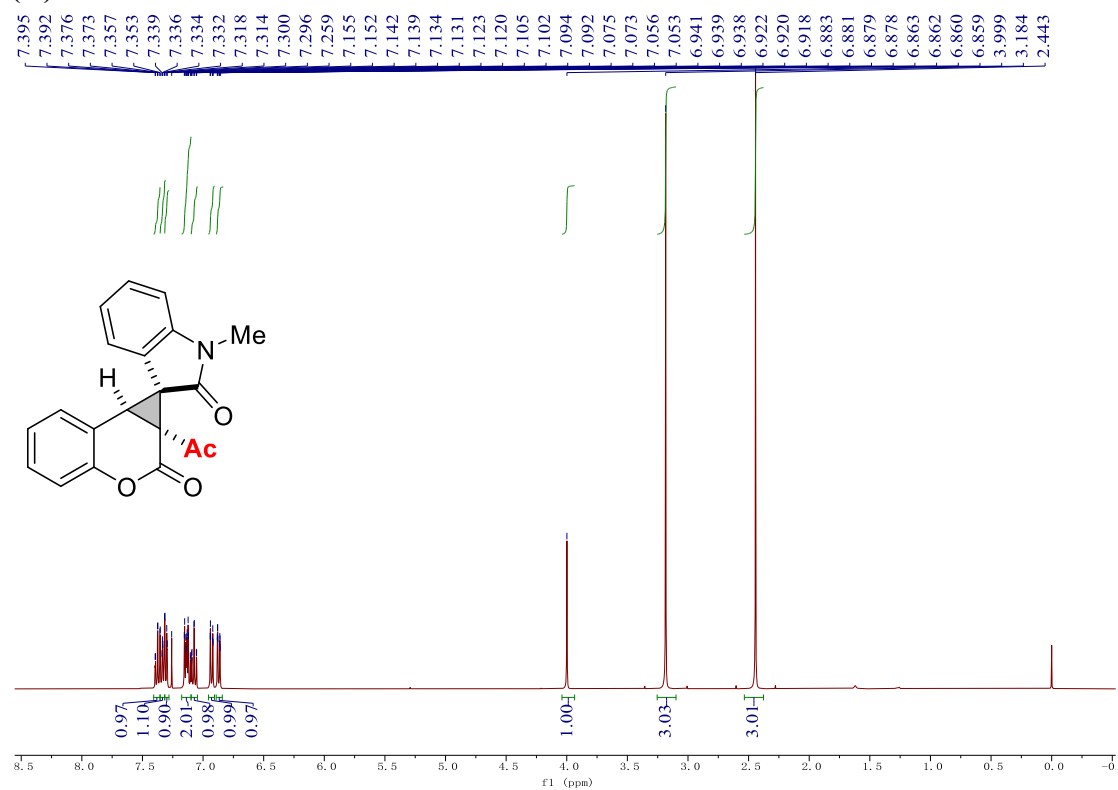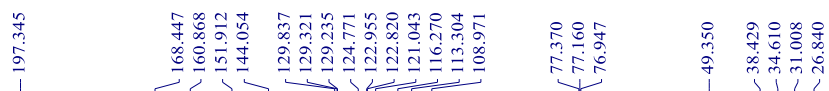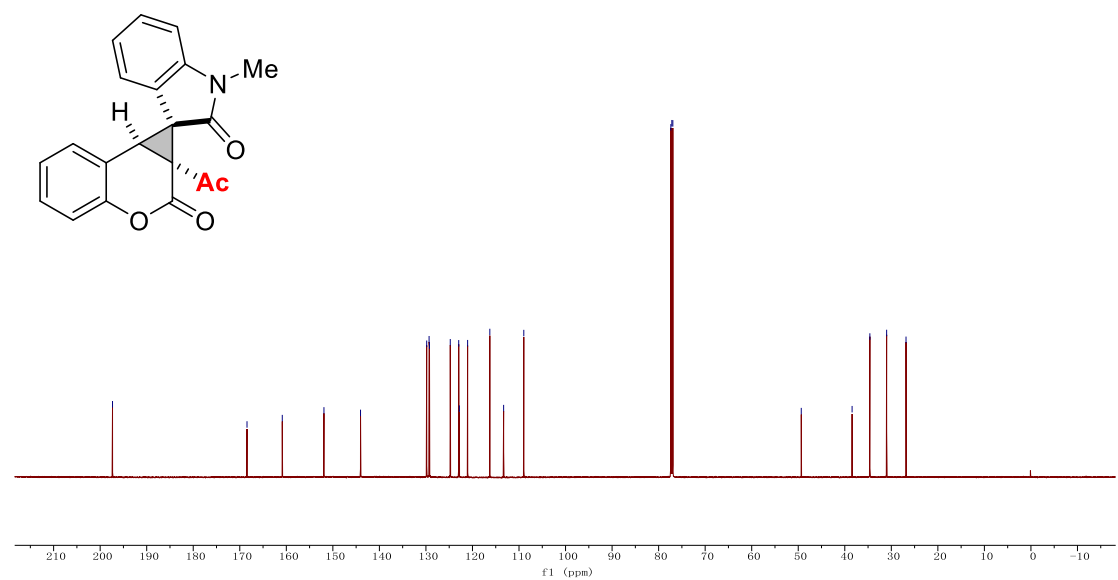

**1a-benzoyl-1'-methyl-1a,7b-dihydro-2H-spiro[cyclopropa[c]chromene-1,3'-indoline]-2,2'-dione (5g)**

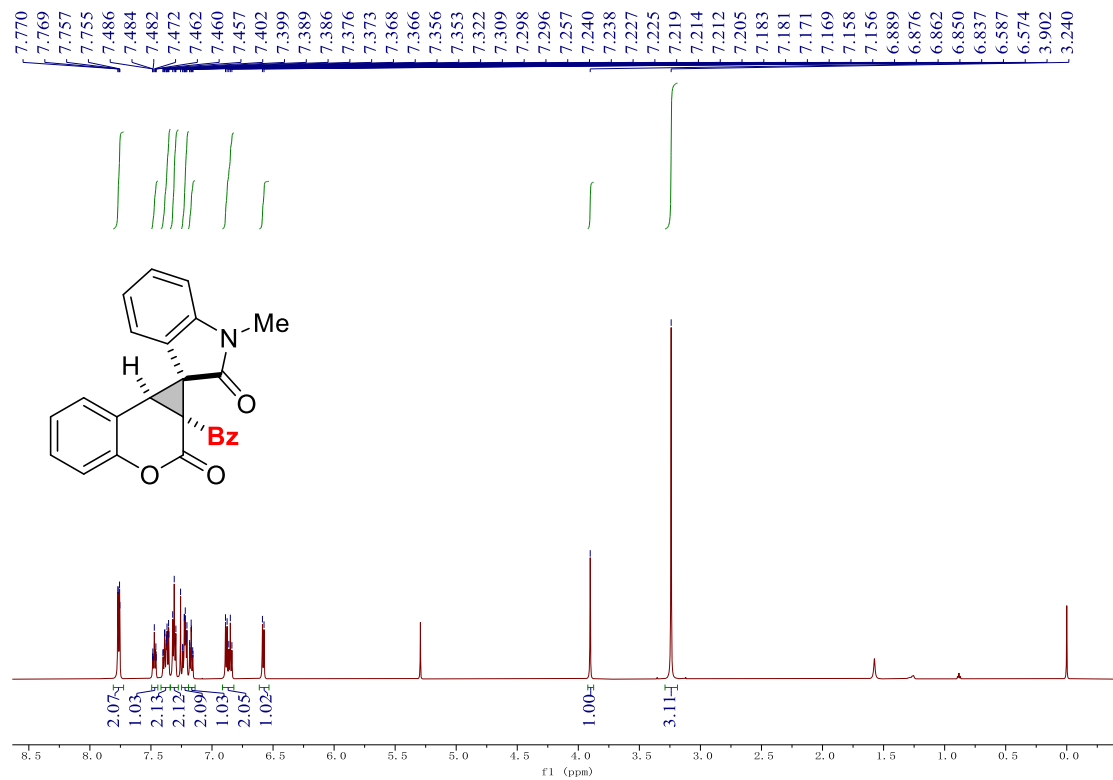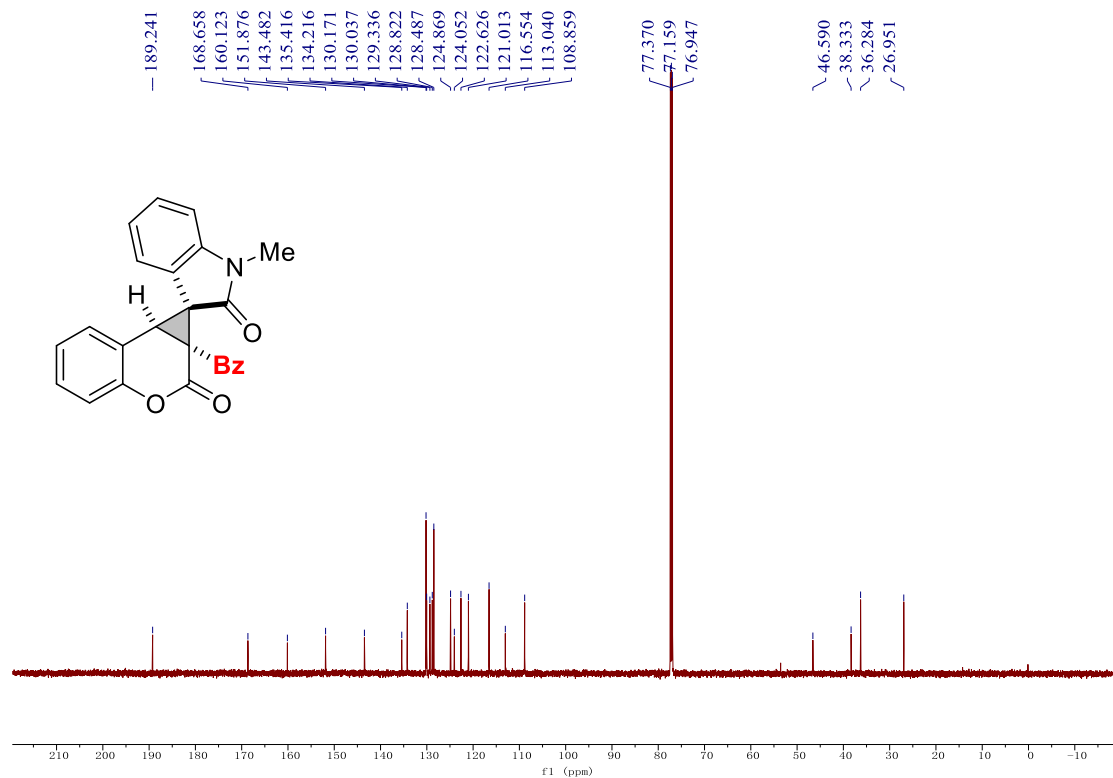

**tert-butyl 5'-bromo-1'-methyl-2,2'-dioxo-2*H*-spiro[cyclopropa[*c*]chromene-1,3'-indoline]-1a(7*bH*)-carboxylate (5h)**

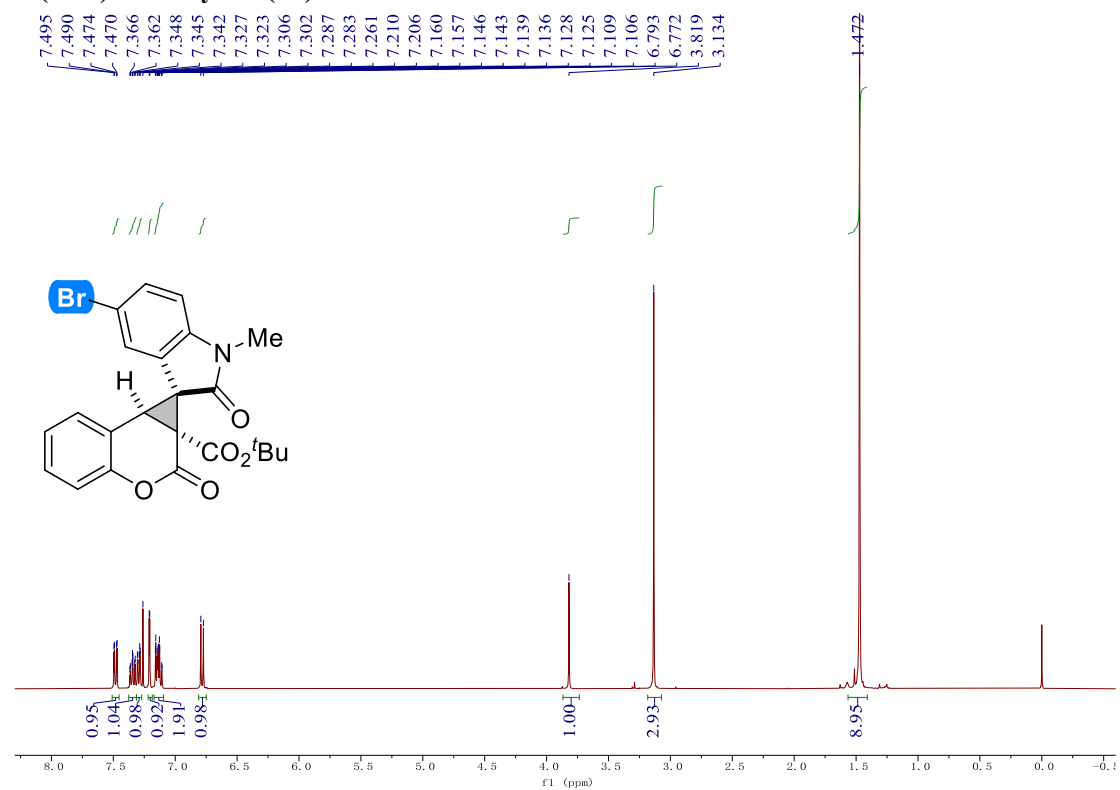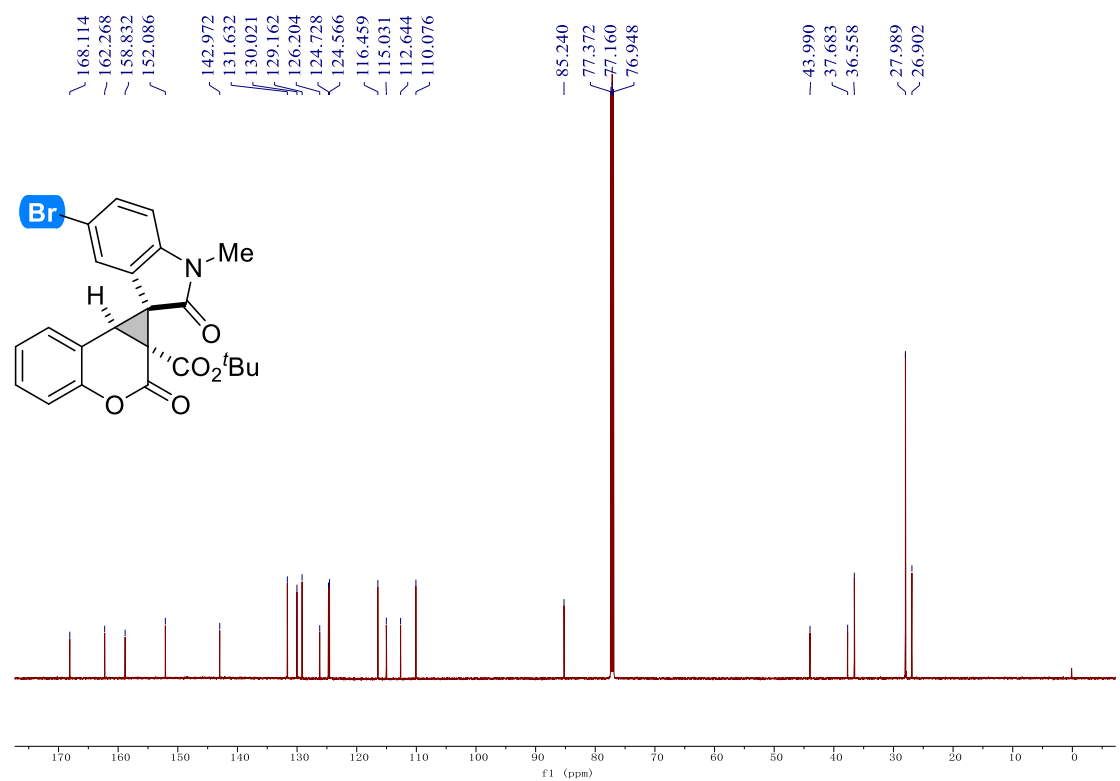

Supplement: d6ob00204h1.pdf [file d6ob00204h1.pdf]
